# Supplementary material
Source: publisher site journal article supplement (https://www.dovepress.com/article/272222)
Supplement: Supplementary file 1 [file get_supplementary_file.php]

# Supplementary materials

Supplemental Fig.1

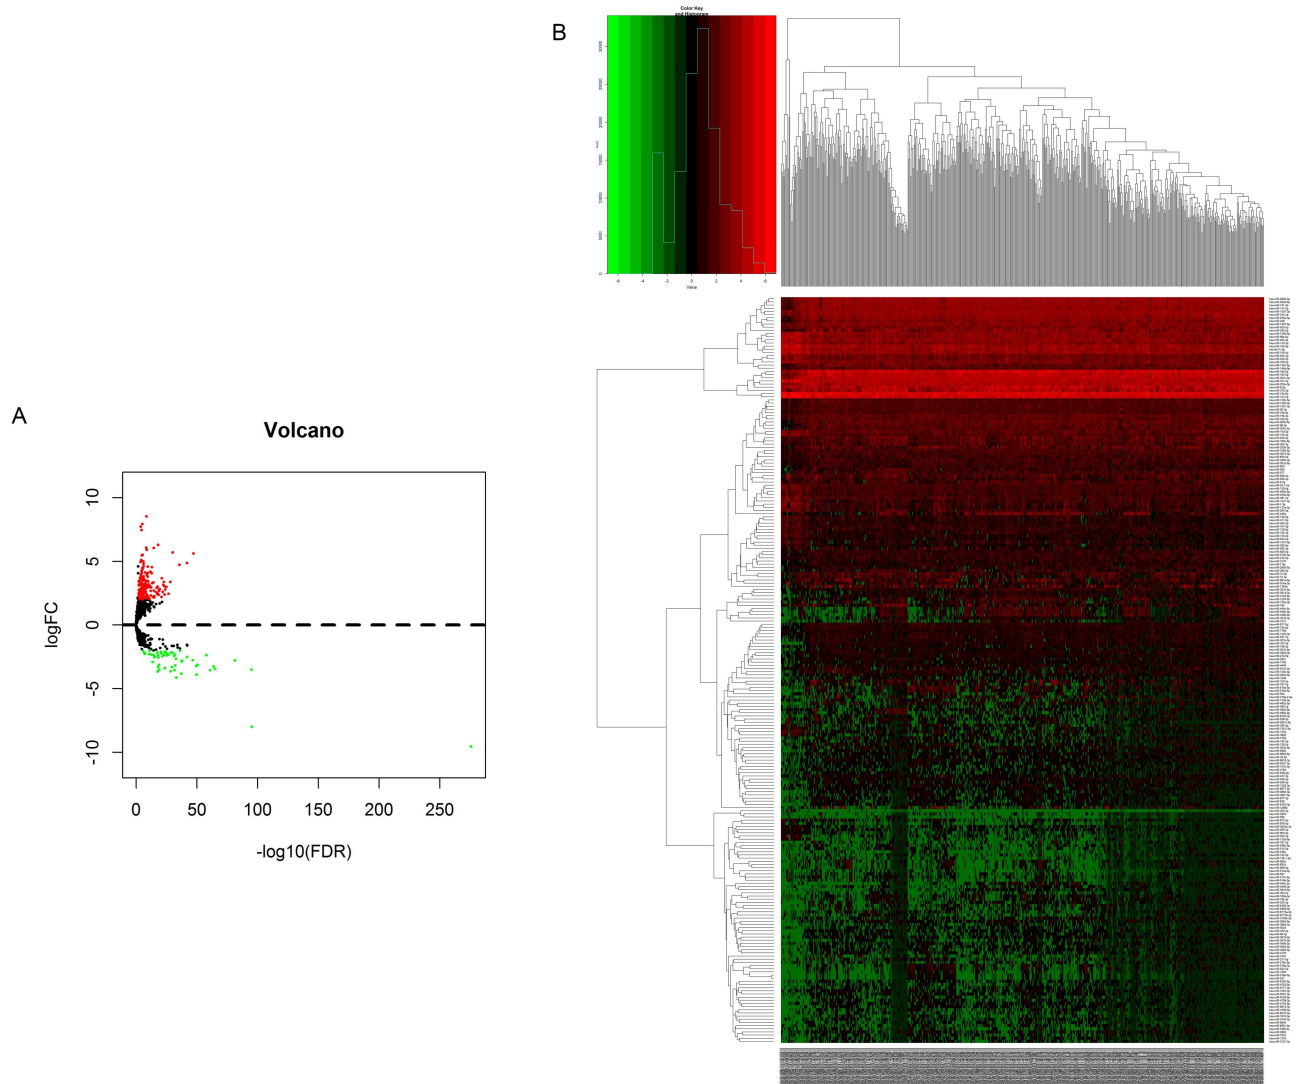

Supplemental Fig. 2

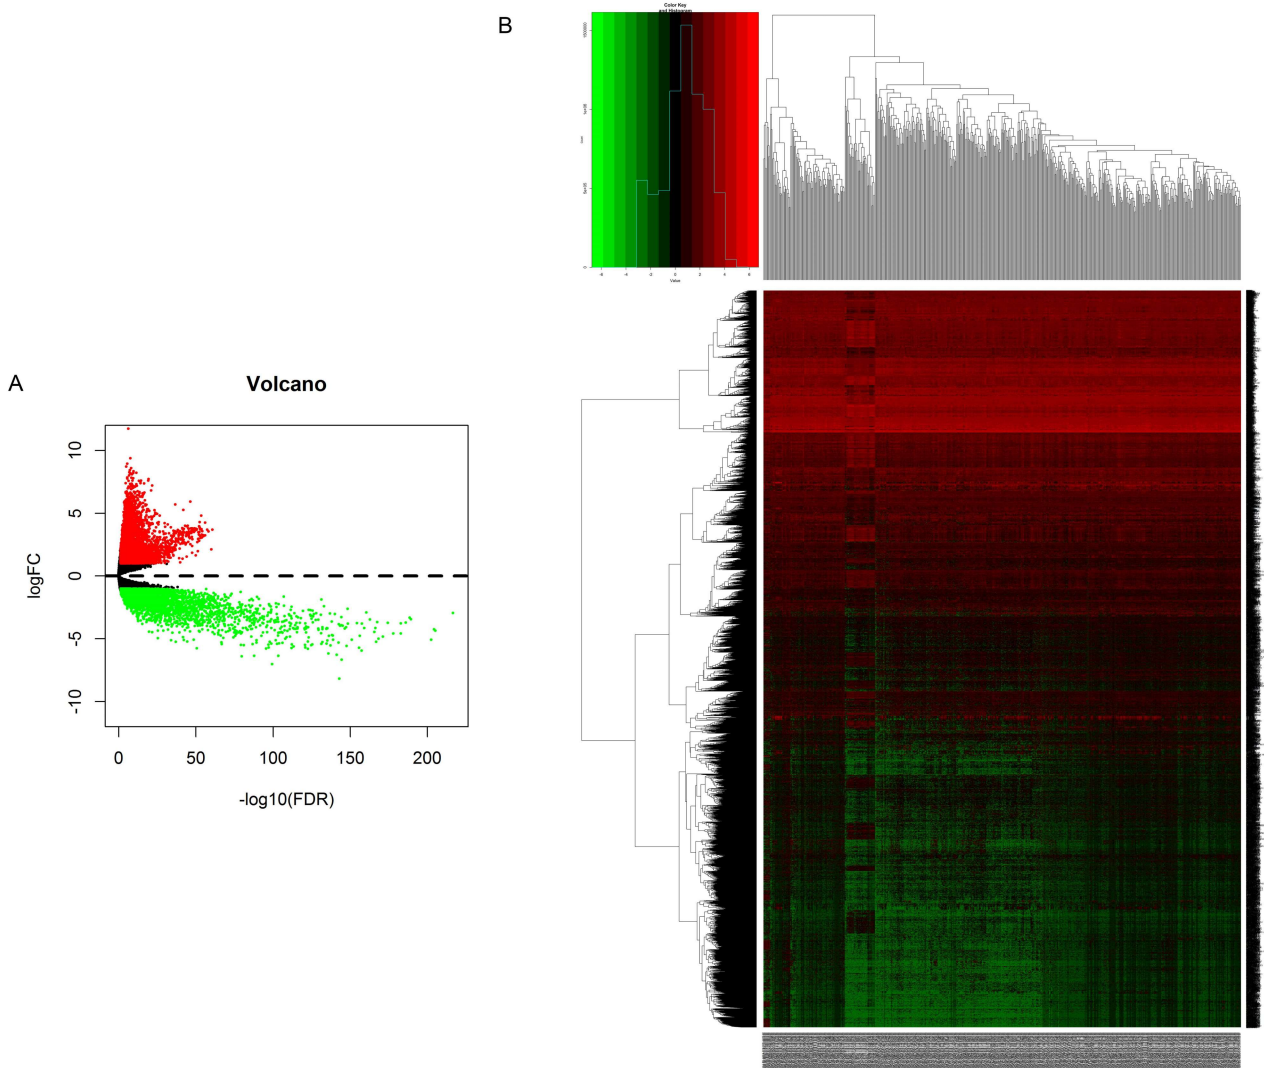

Supplemental Fig. 3

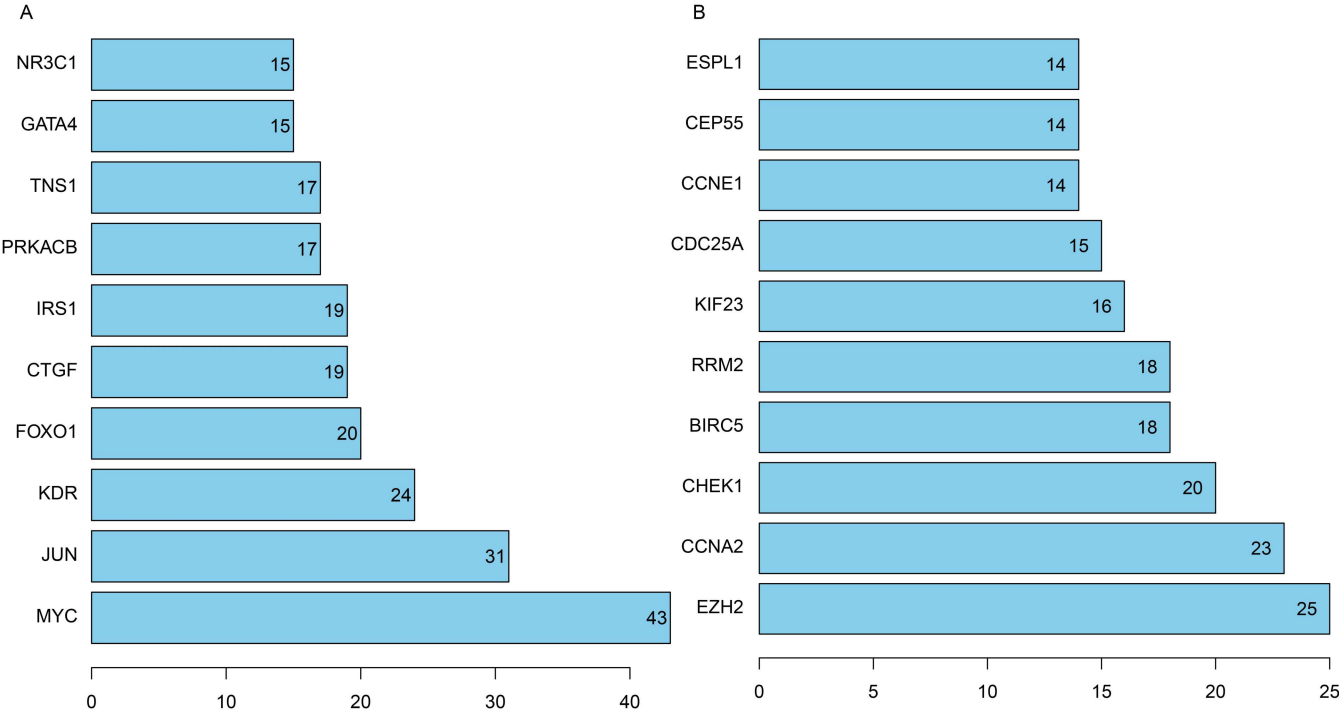



Supplemental Fig. 4

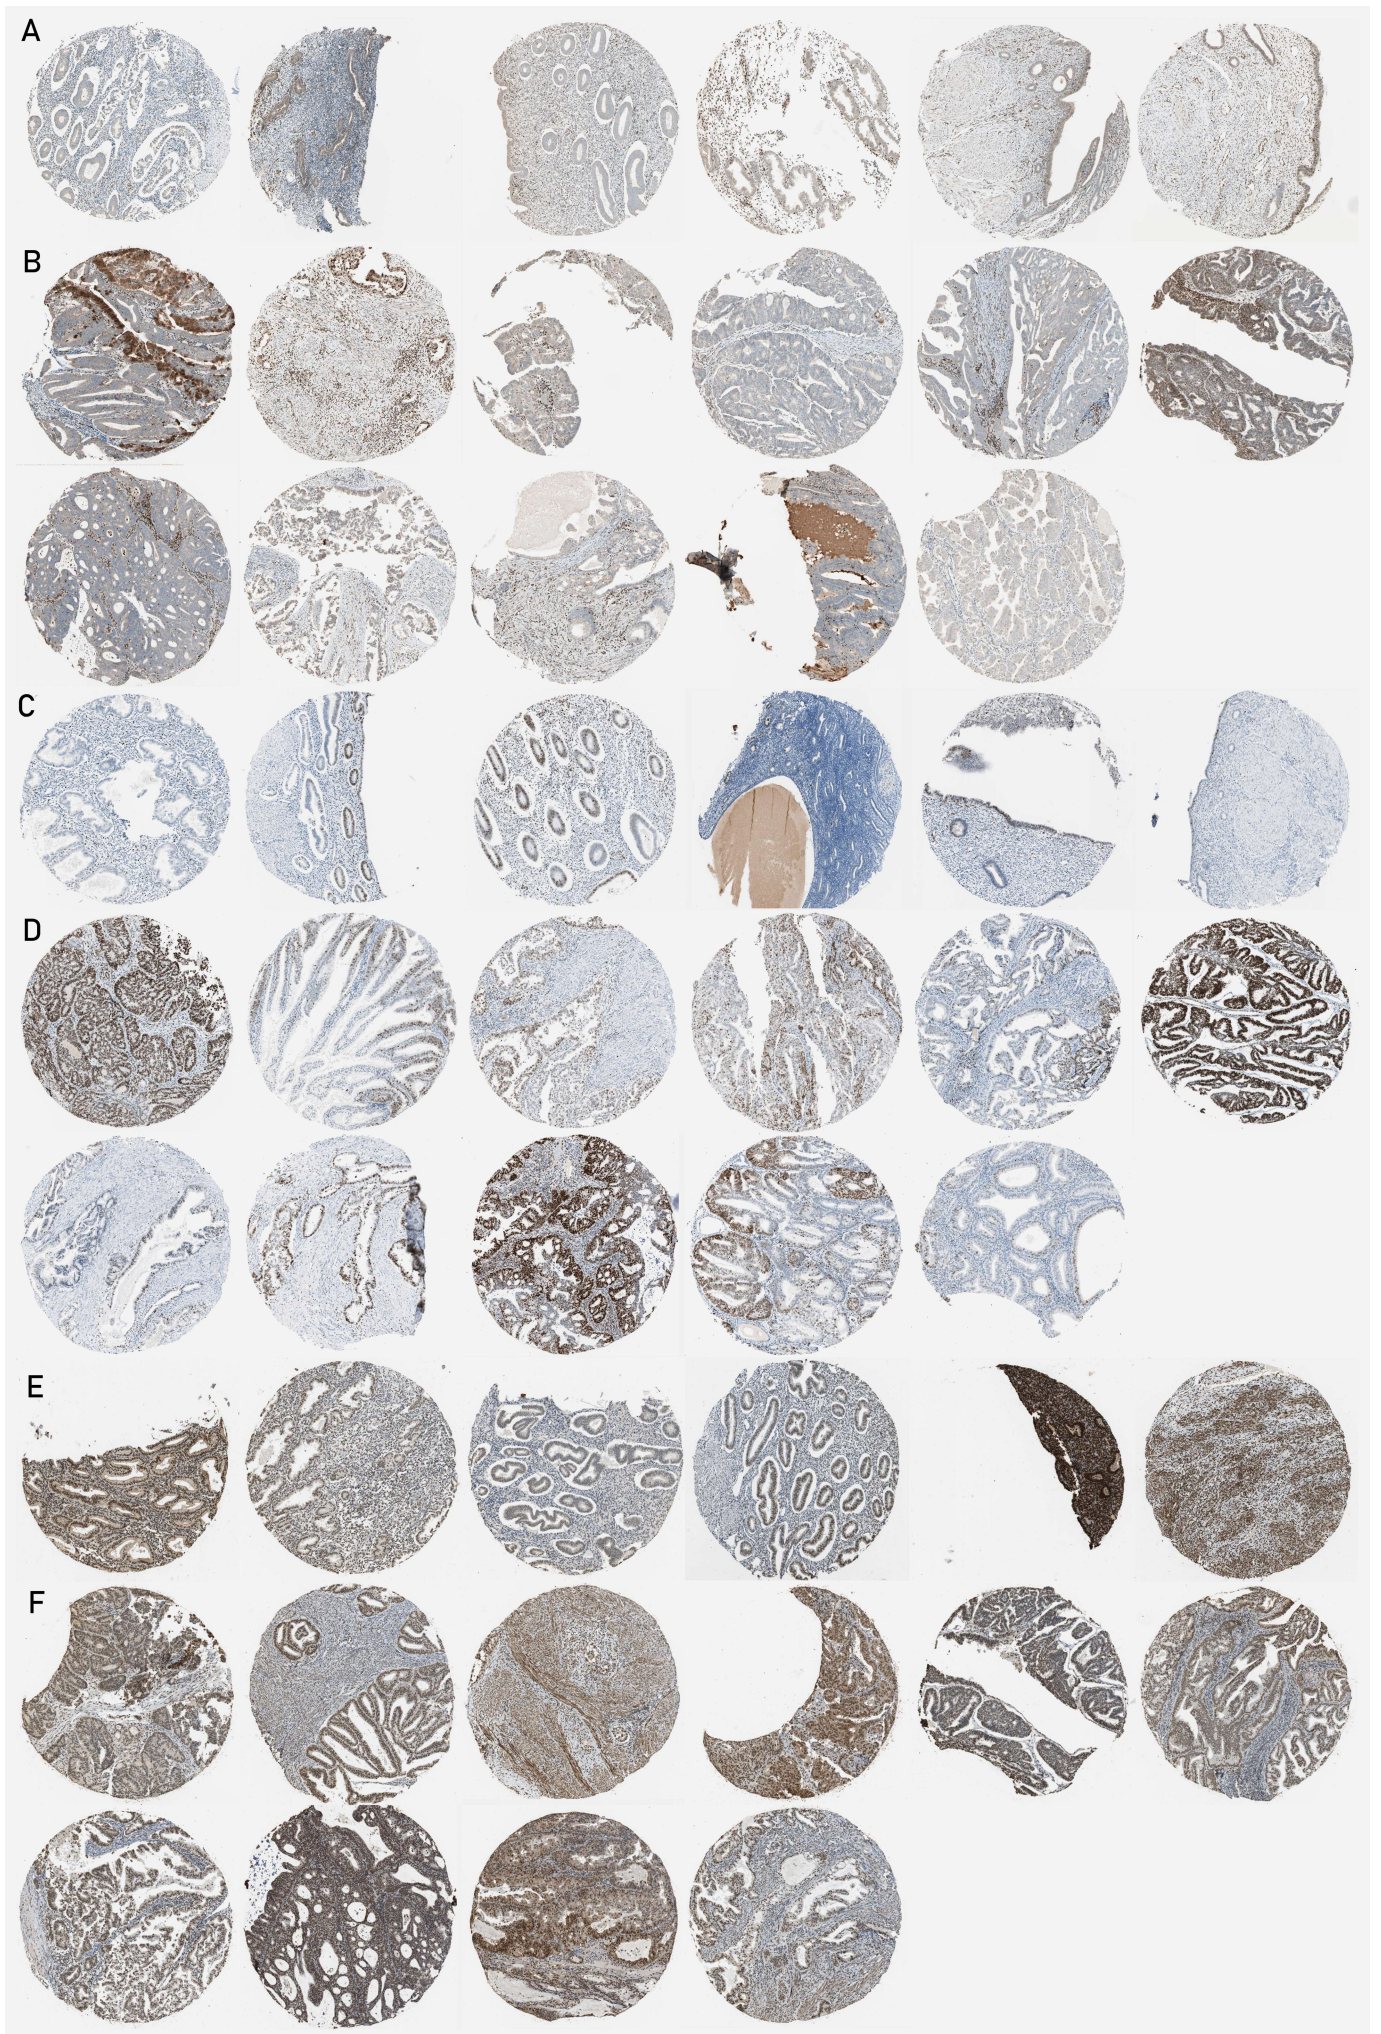



Supplemental Fig. 5

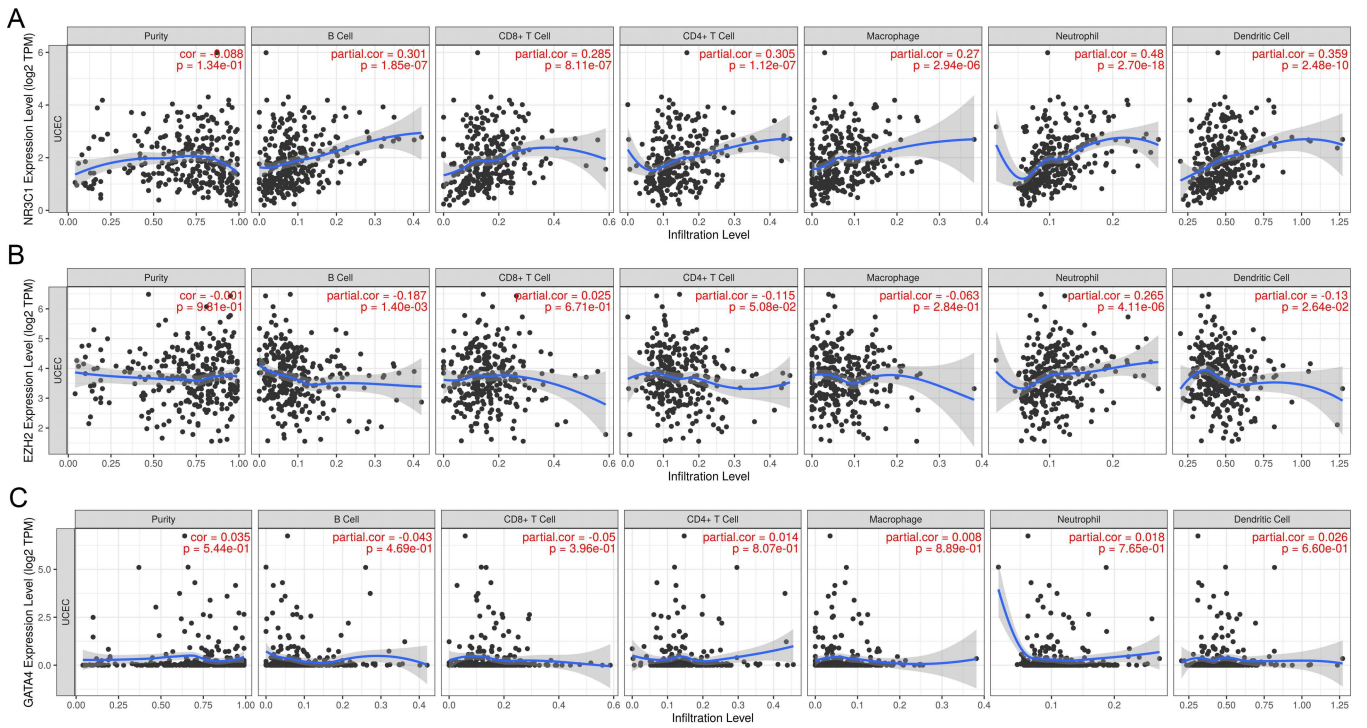

1 **Supplemental figure legends**

2

3 **Supplemental Fig. 1** (A) Volcano Plot of differentially expressed miRNAs.

4 Abscissa axis:  $\log_2$  (FC); Vertical axis:  $-\log_{10}$  (FDR); Green: downregulated

5 miRNAs; Red: upregulated miRNAs; Black: no significant differences in

6 miRNAs expression. (B) Heat map of differentially expressed miRNAs.

7 Green: downregulated miRNAs; Red: upregulated miRNAs. FDR: false

8 discovery rate; FC: fold change.

9

10 **Supplemental Fig. 2** (A) Volcano Plot of differentially expressed mRNAs.

11 Abscissa axis:  $\log_2$  (FC); Vertical axis:  $-\log_{10}$  (FDR); Green: downregulated

12 mRNAs; Red: upregulated mRNAs; Black: no significantly differences in

13 mRNA expression. (B) Heat map of differentially expressed mRNAs.

14 Green: downregulated mRNAs; Red: upregulated miRNAs.

15

16 **Supplemental Fig. 3** The top 10 hub genes of upregulated(A) and

17 downregulated(B) DE-miRNAs.

18

19 **Supplemental Fig. 4** IHC data from the Human Protein Atlas. High

20 expression of NR3C1, EZH2, and GATA4 in normal endometrial tissues

21 (Supplemental Fig. 4A, 4C, and 4E) than in EC tissues (Supplemental Fig.

22 4B, 4D, and 4F).

1

2 **Supplemental Fig. 5** The validation in TIMER 2.0 between the  
3 tumor-infiltrating immune cells and the three hub genes, NR3C1, EZH2,  
4 as well as GATA4. (A-C) shows the correlation between each  
5 tumor-infiltrating immune cell and three hub genes.

6

**Supplemental Table 1** Sequences of primers for qRT-PCR

| Name             | Sequence                                                      |
|------------------|---------------------------------------------------------------|
| Hsa-miR-18a-5p   |                                                               |
| Forward          | CGGGCTAAGGTGCATCTAGTG                                         |
| Reverse          | CCTGTTGTCTCCAGCCACAAAAGAGCACAATATTTTCAGGAGA<br>CAACAGGCTAACTG |
| Hsa-miR-449c -5p |                                                               |
| Forward          | CGGGCTAGGCAGTGTATTGCTAG                                       |
| Reverse          | CCTGTTGTCTCCAGCCACAAAAGAGCACAATATTTTCAGGAGA<br>CAACAGGACAGCCG |
| Hsa-miR-1224-5p  |                                                               |
| Forward          | CGGGCGTGAGGACTCGG                                             |
| Reverse          | CCTGTTGTCTCCAGCCACAAAAGAGCACAATATTTTCAGGAGA<br>CAACAGGCCACCTC |
| Hsa-miR-636      |                                                               |
| Forward          | CGGGCTGTGCTTGCTCGTCCC                                         |
| Reverse          | CCTGTTGTCTCCAGCCACAAAAGAGCACAATATTTTCAGGAGA<br>CAACAGGTGCGGGC |
| Hsa-miR-6715a-3p |                                                               |
| Forward          | CGGGCCCAAACCAGTCGTG                                           |
| Reverse          | CCTGTTGTCTCCAGCCACAAAAGAGCACAATATTTTCAGGAGA<br>CAACAGGCCACAGG |



|         |                         |
|---------|-------------------------|
| U6      |                         |
| Forward | CTCGCTTCGGCAGCACA       |
| Reverse | AACGCTTCACGAATTTGCGT    |
| CTGF    |                         |
| Forward | CAGCATGGACGTTTCGTCTG    |
| Reverse | AACCACGGTTTGGTCCTTGG    |
| NR3C1   |                         |
| Forward | ACAGCATCCCTTTCTCAACAG   |
| Reverse | AGATCCTTGGCACCTATTCCAAT |
| FOXO1   |                         |
| Forward | CGGCTTCGGCTCTTAGCAA     |
| Reverse | TCGTCATAATCTGTCCCTACACA |
| PRKACB  |                         |
| Forward | CCATGCACGGTTCTATGCAG    |
| Reverse | GTCTGTGACCTGGATATAGCCTT |
| MYC     |                         |
| Forward | GCCACGTCTCCACACATCAG    |
| Reverse | TCTTGGCAGCAGGATAGTCCTT  |
| TNS1    |                         |
| Forward | AGCGGAGACCTGACATCAC     |
| Reverse | CGGTTTCCCTTGTTGTGTAGAAC |
| GAPDH   |                         |

|         |                        |
|---------|------------------------|
| Forward | ATCAATGGAAATCCCATCACCA |
| Reverse | GACTCCACGACGTACTCAGCG  |

**Supplemental Table 2** Target genes for upregulated and downregulated miRNAs

| target-up miRNA   | Gene    | miRDB | miRTarBas | TargetScar | Sum |
|-------------------|---------|-------|-----------|------------|-----|
| hsa-miR-1248      | ZYG11B  | 1     | 1         | 1          | 3   |
| hsa-miR-940       | ZSCAN29 | 1     | 1         | 1          | 3   |
| hsa-miR-940       | ZNRF3   | 1     | 1         | 1          | 3   |
| hsa-miR-3619-5p   | ZNRF1   | 1     | 1         | 1          | 3   |
| hsa-miR-20b-5p    | ZNFX1   | 1     | 1         | 1          | 3   |
| hsa-miR-106a-5p   | ZNFX1   | 1     | 1         | 1          | 3   |
| hsa-miR-183-3p    | ZNF99   | 1     | 1         | 1          | 3   |
| hsa-miR-135b-3p   | ZNF99   | 1     | 1         | 1          | 3   |
| hsa-miR-219a-2-3p | ZNF99   | 1     | 1         | 1          | 3   |
| hsa-miR-548d-3p   | ZNF845  | 1     | 1         | 1          | 3   |
| hsa-miR-3614-5p   | ZNF831  | 1     | 1         | 1          | 3   |
| hsa-miR-892a      | ZNF805  | 1     | 1         | 1          | 3   |
| hsa-miR-31-5p     | ZNF805  | 1     | 1         | 1          | 3   |
| hsa-miR-301b-3p   | ZNF800  | 1     | 1         | 1          | 3   |
| hsa-miR-20b-5p    | ZNF800  | 1     | 1         | 1          | 3   |
| hsa-miR-130b-3p   | ZNF800  | 1     | 1         | 1          | 3   |
| hsa-miR-3662      | ZNF800  | 1     | 1         | 1          | 3   |
| hsa-miR-1229-3p   | ZNF781  | 1     | 1         | 1          | 3   |
| hsa-miR-1229-3p   | ZNF780A | 1     | 1         | 1          | 3   |
| hsa-miR-449b-3p   | ZNF76   | 1     | 1         | 1          | 3   |
| hsa-miR-130b-3p   | ZNF711  | 1     | 1         | 1          | 3   |
| hsa-miR-301b-3p   | ZNF711  | 1     | 1         | 1          | 3   |
| hsa-miR-4446-3p   | ZNF704  | 1     | 1         | 1          | 3   |
| hsa-miR-3662      | ZNF680  | 1     | 1         | 1          | 3   |
| hsa-miR-200a-5p   | ZNF675  | 1     | 1         | 1          | 3   |
| hsa-miR-449a      | ZNF644  | 1     | 1         | 1          | 3   |
| hsa-miR-18b-3p    | ZNF644  | 1     | 1         | 1          | 3   |
| hsa-miR-449b-5p   | ZNF644  | 1     | 1         | 1          | 3   |
| hsa-miR-3619-5p   | ZNF641  | 1     | 1         | 1          | 3   |
| hsa-miR-877-3p    | ZNF629  | 1     | 1         | 1          | 3   |
| hsa-miR-940       | ZNF609  | 1     | 1         | 1          | 3   |
| hsa-miR-3065-5p   | ZNF585B | 1     | 1         | 1          | 3   |
| hsa-miR-216b-5p   | ZNF566  | 1     | 1         | 1          | 3   |
| hsa-miR-3150b-3p  | ZNF561  | 1     | 1         | 1          | 3   |
| hsa-miR-449a      | ZNF551  | 1     | 1         | 1          | 3   |
| hsa-miR-106a-5p   | ZNF532  | 1     | 1         | 1          | 3   |
| hsa-miR-20b-5p    | ZNF532  | 1     | 1         | 1          | 3   |
| hsa-miR-548f-3p   | ZNF451  | 1     | 1         | 1          | 3   |
| hsa-miR-6499-3p   | ZNF449  | 1     | 1         | 1          | 3   |
| hsa-miR-9-5p      | ZNF407  | 1     | 1         | 1          | 3   |
| hsa-miR-526b-5p   | ZNF37A  | 1     | 1         | 1          | 3   |
| hsa-miR-18a-5p    | ZNF367  | 1     | 1         | 1          | 3   |
| hsa-miR-18b-5p    | ZNF367  | 1     | 1         | 1          | 3   |
| hsa-miR-3161      | ZNF367  | 1     | 1         | 1          | 3   |
| hsa-miR-7-5p      | ZNF365  | 1     | 1         | 1          | 3   |
| hsa-miR-1301-3p   | ZNF333  | 1     | 1         | 1          | 3   |
| hsa-miR-6815-3p   | ZNF331  | 1     | 1         | 1          | 3   |
| hsa-miR-1266-5p   | ZNF3    | 1     | 1         | 1          | 3   |
| hsa-miR-301a-5p   | ZNF286A | 1     | 1         | 1          | 3   |
| hsa-miR-301b-5p   | ZNF286A | 1     | 1         | 1          | 3   |
| hsa-miR-6499-3p   | ZNF281  | 1     | 1         | 1          | 3   |
| hsa-miR-20b-5p    | ZNF280B | 1     | 1         | 1          | 3   |
| hsa-miR-1224-5p   | ZNF275  | 1     | 1         | 1          | 3   |
| hsa-miR-7-5p      | ZNF275  | 1     | 1         | 1          | 3   |
| hsa-miR-522-3p    | ZNF275  | 1     | 1         | 1          | 3   |
| hsa-miR-18a-3p    | ZNF275  | 1     | 1         | 1          | 3   |

|                  |         |   |   |   |   |
|------------------|---------|---|---|---|---|
| hsa-miR-556-5p   | ZNF268  | 1 | 1 | 1 | 3 |
| hsa-miR-629-3p   | ZNF266  | 1 | 1 | 1 | 3 |
| hsa-miR-6715a-3p | ZNF264  | 1 | 1 | 1 | 3 |
| hsa-miR-6715b-3p | ZNF264  | 1 | 1 | 1 | 3 |
| hsa-miR-183-3p   | ZNF257  | 1 | 1 | 1 | 3 |
| hsa-miR-200a-5p  | ZNF254  | 1 | 1 | 1 | 3 |
| hsa-miR-130b-3p  | ZNF217  | 1 | 1 | 1 | 3 |
| hsa-miR-200c-3p  | ZNF217  | 1 | 1 | 1 | 3 |
| hsa-miR-891b     | ZNF207  | 1 | 1 | 1 | 3 |
| hsa-miR-106a-5p  | ZNF202  | 1 | 1 | 1 | 3 |
| hsa-miR-20b-5p   | ZNF202  | 1 | 1 | 1 | 3 |
| hsa-miR-1229-3p  | ZNF195  | 1 | 1 | 1 | 3 |
| hsa-miR-877-5p   | ZNF174  | 1 | 1 | 1 | 3 |
| hsa-miR-9-3p     | ZNF148  | 1 | 1 | 1 | 3 |
| hsa-miR-135b-3p  | ZNF138  | 1 | 1 | 1 | 3 |
| hsa-miR-183-3p   | ZNF138  | 1 | 1 | 1 | 3 |
| hsa-miR-512-3p   | ZNF12   | 1 | 1 | 1 | 3 |
| hsa-miR-1224-5p  | ZNF117  | 1 | 1 | 1 | 3 |
| hsa-miR-183-3p   | ZNF117  | 1 | 1 | 1 | 3 |
| hsa-miR-7-5p     | ZNF106  | 1 | 1 | 1 | 3 |
| hsa-miR-138-5p   | ZMYND11 | 1 | 1 | 1 | 3 |
| hsa-miR-3065-5p  | ZMYM6   | 1 | 1 | 1 | 3 |
| hsa-miR-518a-5p  | ZMAT3   | 1 | 1 | 1 | 3 |
| hsa-miR-526b-5p  | ZMAT3   | 1 | 1 | 1 | 3 |
| hsa-miR-130b-3p  | ZMAT3   | 1 | 1 | 1 | 3 |
| hsa-miR-301b-3p  | ZMAT3   | 1 | 1 | 1 | 3 |
| hsa-miR-200b-3p  | ZMAT3   | 1 | 1 | 1 | 3 |
| hsa-miR-200c-3p  | ZMAT3   | 1 | 1 | 1 | 3 |
| hsa-miR-215-5p   | ZMAT3   | 1 | 1 | 1 | 3 |
| hsa-miR-527      | ZMAT3   | 1 | 1 | 1 | 3 |
| hsa-miR-3662     | ZMAT3   | 1 | 1 | 1 | 3 |
| hsa-miR-429      | ZMAT3   | 1 | 1 | 1 | 3 |
| hsa-miR-1248     | ZMAT1   | 1 | 1 | 1 | 3 |
| hsa-miR-767-5p   | ZKSCAN2 | 1 | 1 | 1 | 3 |
| hsa-miR-1304-3p  | ZKSCAN1 | 1 | 1 | 1 | 3 |
| hsa-miR-106a-5p  | ZFYVE9  | 1 | 1 | 1 | 3 |
| hsa-miR-20b-5p   | ZFYVE9  | 1 | 1 | 1 | 3 |
| hsa-miR-301b-3p  | ZFYVE9  | 1 | 1 | 1 | 3 |
| hsa-miR-141-5p   | ZFYVE9  | 1 | 1 | 1 | 3 |
| hsa-miR-130b-3p  | ZFYVE9  | 1 | 1 | 1 | 3 |
| hsa-miR-526b-5p  | ZFYVE9  | 1 | 1 | 1 | 3 |
| hsa-miR-130b-3p  | ZFYVE26 | 1 | 1 | 1 | 3 |
| hsa-miR-301b-3p  | ZFYVE26 | 1 | 1 | 1 | 3 |
| hsa-miR-106a-5p  | ZFYVE26 | 1 | 1 | 1 | 3 |
| hsa-miR-20b-5p   | ZFYVE26 | 1 | 1 | 1 | 3 |
| hsa-miR-363-3p   | ZFYVE21 | 1 | 1 | 1 | 3 |
| hsa-miR-200b-3p  | ZFPM2   | 1 | 1 | 1 | 3 |
| hsa-miR-429      | ZFPM2   | 1 | 1 | 1 | 3 |
| hsa-miR-200c-3p  | ZFPM2   | 1 | 1 | 1 | 3 |
| hsa-miR-548f-3p  | ZFP36L1 | 1 | 1 | 1 | 3 |
| hsa-miR-4664-5p  | ZFP3    | 1 | 1 | 1 | 3 |
| hsa-miR-4449     | ZFHX3   | 1 | 1 | 1 | 3 |
| hsa-miR-211-5p   | ZFHX3   | 1 | 1 | 1 | 3 |
| hsa-miR-363-3p   | ZFC3H1  | 1 | 1 | 1 | 3 |
| hsa-miR-9-5p     | ZFAND1  | 1 | 1 | 1 | 3 |
| hsa-miR-200a-3p  | ZEB2    | 1 | 1 | 1 | 3 |
| hsa-miR-138-5p   | ZEB2    | 1 | 1 | 1 | 3 |
| hsa-miR-141-3p   | ZEB2    | 1 | 1 | 1 | 3 |



|                   |         |   |   |   |   |
|-------------------|---------|---|---|---|---|
| hsa-miR-429       | ZEB1    | 1 | 1 | 1 | 3 |
| hsa-miR-205-5p    | ZEB1    | 1 | 1 | 1 | 3 |
| hsa-miR-183-5p    | ZEB1    | 1 | 1 | 1 | 3 |
| hsa-miR-96-5p     | ZEB1    | 1 | 1 | 1 | 3 |
| hsa-miR-141-3p    | ZEB1    | 1 | 1 | 1 | 3 |
| hsa-miR-200c-3p   | ZEB1    | 1 | 1 | 1 | 3 |
| hsa-miR-200a-3p   | ZEB1    | 1 | 1 | 1 | 3 |
| hsa-miR-200b-3p   | ZEB1    | 1 | 1 | 1 | 3 |
| hsa-miR-216b-5p   | ZDHHC9  | 1 | 1 | 1 | 3 |
| hsa-miR-363-3p    | ZDHHC5  | 1 | 1 | 1 | 3 |
| hsa-miR-548y      | ZDHHC21 | 1 | 1 | 1 | 3 |
| hsa-miR-548j-5p   | ZDHHC21 | 1 | 1 | 1 | 3 |
| hsa-miR-215-5p    | ZDHHC2  | 1 | 1 | 1 | 3 |
| hsa-miR-3616-5p   | ZCCHC3  | 1 | 1 | 1 | 3 |
| hsa-miR-211-5p    | ZCCHC24 | 1 | 1 | 1 | 3 |
| hsa-miR-1224-5p   | ZCCHC14 | 1 | 1 | 1 | 3 |
| hsa-miR-130b-3p   | ZCCHC14 | 1 | 1 | 1 | 3 |
| hsa-miR-3065-5p   | ZC3HAV1 | 1 | 1 | 1 | 3 |
| hsa-miR-7-5p      | ZC3H4   | 1 | 1 | 1 | 3 |
| hsa-miR-940       | ZC3H4   | 1 | 1 | 1 | 3 |
| hsa-miR-106a-5p   | ZC3H12C | 1 | 1 | 1 | 3 |
| hsa-miR-20b-5p    | ZC3H12C | 1 | 1 | 1 | 3 |
| hsa-miR-31-5p     | ZC3H12C | 1 | 1 | 1 | 3 |
| hsa-miR-20b-5p    | ZBTB9   | 1 | 1 | 1 | 3 |
| hsa-miR-106a-5p   | ZBTB7A  | 1 | 1 | 1 | 3 |
| hsa-miR-4664-5p   | ZBTB7A  | 1 | 1 | 1 | 3 |
| hsa-miR-20b-5p    | ZBTB7A  | 1 | 1 | 1 | 3 |
| hsa-miR-18b-5p    | ZBTB47  | 1 | 1 | 1 | 3 |
| hsa-miR-6777-5p   | ZBTB47  | 1 | 1 | 1 | 3 |
| hsa-miR-18a-5p    | ZBTB47  | 1 | 1 | 1 | 3 |
| hsa-miR-106a-5p   | ZBTB47  | 1 | 1 | 1 | 3 |
| hsa-miR-3150b-3p  | ZBTB44  | 1 | 1 | 1 | 3 |
| hsa-miR-1226-3p   | ZBTB40  | 1 | 1 | 1 | 3 |
| hsa-miR-106a-5p   | ZBTB4   | 1 | 1 | 1 | 3 |
| hsa-miR-301b-3p   | ZBTB4   | 1 | 1 | 1 | 3 |
| hsa-miR-7974      | ZBTB4   | 1 | 1 | 1 | 3 |
| hsa-miR-20b-5p    | ZBTB4   | 1 | 1 | 1 | 3 |
| hsa-miR-130b-3p   | ZBTB4   | 1 | 1 | 1 | 3 |
| hsa-miR-527       | ZBTB4   | 1 | 1 | 1 | 3 |
| hsa-miR-518a-5p   | ZBTB4   | 1 | 1 | 1 | 3 |
| hsa-miR-4446-3p   | ZBTB39  | 1 | 1 | 1 | 3 |
| hsa-miR-141-3p    | ZBTB34  | 1 | 1 | 1 | 3 |
| hsa-miR-200a-3p   | ZBTB34  | 1 | 1 | 1 | 3 |
| hsa-miR-211-5p    | ZBTB22  | 1 | 1 | 1 | 3 |
| hsa-miR-7-5p      | ZBTB22  | 1 | 1 | 1 | 3 |
| hsa-miR-548y      | ZBTB20  | 1 | 1 | 1 | 3 |
| hsa-miR-548j-5p   | ZBTB20  | 1 | 1 | 1 | 3 |
| hsa-miR-20b-5p    | ZBTB18  | 1 | 1 | 1 | 3 |
| hsa-miR-130b-3p   | ZBTB18  | 1 | 1 | 1 | 3 |
| hsa-miR-1301-3p   | ZBTB18  | 1 | 1 | 1 | 3 |
| hsa-miR-301b-3p   | ZBTB18  | 1 | 1 | 1 | 3 |
| hsa-miR-106a-5p   | ZBTB18  | 1 | 1 | 1 | 3 |
| hsa-miR-3619-5p   | ZBTB10  | 1 | 1 | 1 | 3 |
| hsa-miR-9-5p      | ZBED3   | 1 | 1 | 1 | 3 |
| hsa-miR-130b-3p   | YY1     | 1 | 1 | 1 | 3 |
| hsa-miR-219a-2-3p | YY1     | 1 | 1 | 1 | 3 |
| hsa-miR-548d-3p   | YWHAZ   | 1 | 1 | 1 | 3 |
| hsa-miR-934       | YWHAZ   | 1 | 1 | 1 | 3 |

|                 |          |   |   |   |   |
|-----------------|----------|---|---|---|---|
| hsa-miR-892a    | YWHAZ    | 1 | 1 | 1 | 3 |
| hsa-miR-940     | YWHAZ    | 1 | 1 | 1 | 3 |
| hsa-miR-141-3p  | YWHAG    | 1 | 1 | 1 | 3 |
| hsa-miR-3662    | YWHAЕ    | 1 | 1 | 1 | 3 |
| hsa-miR-6891-5p | YWHAЕ    | 1 | 1 | 1 | 3 |
| hsa-miR-203a-5p | YWHAЕ    | 1 | 1 | 1 | 3 |
| hsa-miR-31-5p   | YWHAЕ    | 1 | 1 | 1 | 3 |
| hsa-miR-4724-5p | YTHDC1   | 1 | 1 | 1 | 3 |
| hsa-miR-3614-3p | YOD1     | 1 | 1 | 1 | 3 |
| hsa-miR-9-3p    | YOD1     | 1 | 1 | 1 | 3 |
| hsa-miR-106a-5p | YOD1     | 1 | 1 | 1 | 3 |
| hsa-miR-20b-5p  | YOD1     | 1 | 1 | 1 | 3 |
| hsa-miR-363-3p  | YIPF4    | 1 | 1 | 1 | 3 |
| hsa-miR-345-5p  | YEATS2   | 1 | 1 | 1 | 3 |
| hsa-miR-141-3p  | YAP1     | 1 | 1 | 1 | 3 |
| hsa-miR-200a-3p | YAP1     | 1 | 1 | 1 | 3 |
| hsa-miR-1301-3p | YAF2     | 1 | 1 | 1 | 3 |
| hsa-miR-18a-5p  | XYLT2    | 1 | 1 | 1 | 3 |
| hsa-miR-449c-5p | XRCC6    | 1 | 1 | 1 | 3 |
| hsa-miR-211-5p  | WWC3     | 1 | 1 | 1 | 3 |
| hsa-miR-215-5p  | WNK1     | 1 | 1 | 1 | 3 |
| hsa-miR-200c-3p | WIPF1    | 1 | 1 | 1 | 3 |
| hsa-miR-940     | WHAMM    | 1 | 1 | 1 | 3 |
| hsa-miR-106a-5p | WEE1     | 1 | 1 | 1 | 3 |
| hsa-miR-130b-3p | WEE1     | 1 | 1 | 1 | 3 |
| hsa-miR-877-3p  | WDR43    | 1 | 1 | 1 | 3 |
| hsa-miR-20b-5p  | WDR37    | 1 | 1 | 1 | 3 |
| hsa-miR-449b-3p | WDR37    | 1 | 1 | 1 | 3 |
| hsa-miR-548j-5p | WBP4     | 1 | 1 | 1 | 3 |
| hsa-miR-548y    | WBP4     | 1 | 1 | 1 | 3 |
| hsa-miR-877-5p  | WASL     | 1 | 1 | 1 | 3 |
| hsa-miR-130b-3p | WASL     | 1 | 1 | 1 | 3 |
| hsa-miR-363-3p  | WASL     | 1 | 1 | 1 | 3 |
| hsa-miR-301b-3p | WASL     | 1 | 1 | 1 | 3 |
| hsa-miR-3065-5p | WASF3    | 1 | 1 | 1 | 3 |
| hsa-miR-429     | WASF3    | 1 | 1 | 1 | 3 |
| hsa-miR-200b-3p | WASF3    | 1 | 1 | 1 | 3 |
| hsa-miR-940     | WASF2    | 1 | 1 | 1 | 3 |
| hsa-miR-629-3p  | WASF2    | 1 | 1 | 1 | 3 |
| hsa-miR-20b-5p  | WAC      | 1 | 1 | 1 | 3 |
| hsa-miR-106a-5p | WAC      | 1 | 1 | 1 | 3 |
| hsa-miR-363-3p  | VPS4B    | 1 | 1 | 1 | 3 |
| hsa-miR-4665-5p | VPS37D   | 1 | 1 | 1 | 3 |
| hsa-miR-449b-5p | VPS37B   | 1 | 1 | 1 | 3 |
| hsa-miR-449a    | VPS37B   | 1 | 1 | 1 | 3 |
| hsa-miR-130b-3p | VPS37A   | 1 | 1 | 1 | 3 |
| hsa-miR-301b-3p | VPS37A   | 1 | 1 | 1 | 3 |
| hsa-miR-940     | VPS33A   | 1 | 1 | 1 | 3 |
| hsa-miR-7-5p    | VPS26A   | 1 | 1 | 1 | 3 |
| hsa-miR-20b-5p  | VPS26A   | 1 | 1 | 1 | 3 |
| hsa-miR-20b-5p  | VPS13C   | 1 | 1 | 1 | 3 |
| hsa-miR-363-3p  | VMA21    | 1 | 1 | 1 | 3 |
| hsa-miR-18b-5p  | VMA21    | 1 | 1 | 1 | 3 |
| hsa-miR-18a-5p  | VMA21    | 1 | 1 | 1 | 3 |
| hsa-miR-548y    | VLDLR    | 1 | 1 | 1 | 3 |
| hsa-miR-548j-5p | VLDLR    | 1 | 1 | 1 | 3 |
| hsa-miR-548d-3p | VKORC1L1 | 1 | 1 | 1 | 3 |
| hsa-miR-6499-3p | VGLL4    | 1 | 1 | 1 | 3 |

|                  |        |   |   |   |   |
|------------------|--------|---|---|---|---|
| hsa-miR-1304-3p  | VEZT   | 1 | 1 | 1 | 3 |
| hsa-miR-141-5p   | VEGFA  | 1 | 1 | 1 | 3 |
| hsa-miR-200c-3p  | VEGFA  | 1 | 1 | 1 | 3 |
| hsa-miR-205-5p   | VEGFA  | 1 | 1 | 1 | 3 |
| hsa-miR-200b-3p  | VEGFA  | 1 | 1 | 1 | 3 |
| hsa-miR-548j-5p  | VDAC2  | 1 | 1 | 1 | 3 |
| hsa-miR-548y     | VDAC2  | 1 | 1 | 1 | 3 |
| hsa-miR-3619-5p  | VAV2   | 1 | 1 | 1 | 3 |
| hsa-miR-636      | VAT1   | 1 | 1 | 1 | 3 |
| hsa-miR-5001-3p  | VASH1  | 1 | 1 | 1 | 3 |
| hsa-miR-1276     | VANGL2 | 1 | 1 | 1 | 3 |
| hsa-miR-940      | VANGL1 | 1 | 1 | 1 | 3 |
| hsa-miR-210-3p   | VAMP4  | 1 | 1 | 1 | 3 |
| hsa-miR-20b-5p   | UXS1   | 1 | 1 | 1 | 3 |
| hsa-miR-940      | UTP15  | 1 | 1 | 1 | 3 |
| hsa-miR-200a-3p  | USP53  | 1 | 1 | 1 | 3 |
| hsa-miR-141-3p   | USP53  | 1 | 1 | 1 | 3 |
| hsa-miR-6815-3p  | USP46  | 1 | 1 | 1 | 3 |
| hsa-miR-3662     | USP45  | 1 | 1 | 1 | 3 |
| hsa-miR-1276     | USP44  | 1 | 1 | 1 | 3 |
| hsa-miR-106a-5p  | USP32  | 1 | 1 | 1 | 3 |
| hsa-miR-301b-3p  | USP32  | 1 | 1 | 1 | 3 |
| hsa-miR-130b-3p  | USP32  | 1 | 1 | 1 | 3 |
| hsa-miR-20b-5p   | USP32  | 1 | 1 | 1 | 3 |
| hsa-miR-20b-5p   | USP3   | 1 | 1 | 1 | 3 |
| hsa-miR-20b-5p   | USP28  | 1 | 1 | 1 | 3 |
| hsa-miR-363-3p   | USP28  | 1 | 1 | 1 | 3 |
| hsa-miR-200c-3p  | USP25  | 1 | 1 | 1 | 3 |
| hsa-miR-301b-3p  | USP13  | 1 | 1 | 1 | 3 |
| hsa-miR-130b-3p  | USP13  | 1 | 1 | 1 | 3 |
| hsa-miR-4664-5p  | USH1G  | 1 | 1 | 1 | 3 |
| hsa-miR-3150b-3p | USB1   | 1 | 1 | 1 | 3 |
| hsa-miR-130b-5p  | UQCRB  | 1 | 1 | 1 | 3 |
| hsa-miR-106a-5p  | UNK    | 1 | 1 | 1 | 3 |
| hsa-miR-636      | UNK    | 1 | 1 | 1 | 3 |
| hsa-miR-20b-5p   | UNK    | 1 | 1 | 1 | 3 |
| hsa-miR-888-5p   | UNC80  | 1 | 1 | 1 | 3 |
| hsa-miR-93-3p    | UNC5C  | 1 | 1 | 1 | 3 |
| hsa-miR-3150b-3p | UNC5B  | 1 | 1 | 1 | 3 |
| hsa-miR-20b-5p   | ULK1   | 1 | 1 | 1 | 3 |
| hsa-miR-106a-5p  | ULK1   | 1 | 1 | 1 | 3 |
| hsa-miR-182-5p   | ULBP2  | 1 | 1 | 1 | 3 |
| hsa-miR-9-5p     | UHMK1  | 1 | 1 | 1 | 3 |
| hsa-miR-940      | UGGT1  | 1 | 1 | 1 | 3 |
| hsa-miR-3664-3p  | UGGT1  | 1 | 1 | 1 | 3 |
| hsa-miR-18a-3p   | UBXN7  | 1 | 1 | 1 | 3 |
| hsa-miR-877-3p   | UBXN7  | 1 | 1 | 1 | 3 |
| hsa-miR-363-3p   | UBXN4  | 1 | 1 | 1 | 3 |
| hsa-miR-7-5p     | UBXN2B | 1 | 1 | 1 | 3 |
| hsa-miR-106a-5p  | UBXN2A | 1 | 1 | 1 | 3 |
| hsa-miR-20b-5p   | UBXN2A | 1 | 1 | 1 | 3 |
| hsa-miR-18a-5p   | UBTD2  | 1 | 1 | 1 | 3 |
| hsa-miR-7-5p     | UBQLN4 | 1 | 1 | 1 | 3 |
| hsa-miR-200c-3p  | UBQLN1 | 1 | 1 | 1 | 3 |
| hsa-miR-301b-3p  | UBN2   | 1 | 1 | 1 | 3 |
| hsa-miR-130b-3p  | UBN2   | 1 | 1 | 1 | 3 |
| hsa-miR-449a     | UBL4A  | 1 | 1 | 1 | 3 |
| hsa-miR-512-3p   | UBL3   | 1 | 1 | 1 | 3 |

|                 |         |   |   |   |   |
|-----------------|---------|---|---|---|---|
| hsa-miR-9-5p    | UBE4B   | 1 | 1 | 1 | 3 |
| hsa-miR-363-3p  | UBE2Z   | 1 | 1 | 1 | 3 |
| hsa-miR-138-5p  | UBE2V1  | 1 | 1 | 1 | 3 |
| hsa-miR-20b-5p  | UBE2Q2  | 1 | 1 | 1 | 3 |
| hsa-miR-4665-5p | UBE2N   | 1 | 1 | 1 | 3 |
| hsa-miR-3662    | UBE2K   | 1 | 1 | 1 | 3 |
| hsa-miR-200c-3p | UBE2I   | 1 | 1 | 1 | 3 |
| hsa-miR-6844    | UBE2H   | 1 | 1 | 1 | 3 |
| hsa-miR-301b-3p | UBE2D2  | 1 | 1 | 1 | 3 |
| hsa-miR-130b-3p | UBE2D2  | 1 | 1 | 1 | 3 |
| hsa-miR-527     | UBE2D2  | 1 | 1 | 1 | 3 |
| hsa-miR-518a-5p | UBE2D2  | 1 | 1 | 1 | 3 |
| hsa-miR-548d-3p | UBE2D1  | 1 | 1 | 1 | 3 |
| hsa-miR-527     | UBE2A   | 1 | 1 | 1 | 3 |
| hsa-miR-518a-5p | UBE2A   | 1 | 1 | 1 | 3 |
| hsa-miR-200a-3p | UBASH3B | 1 | 1 | 1 | 3 |
| hsa-miR-20b-5p  | U2SURP  | 1 | 1 | 1 | 3 |
| hsa-miR-3065-5p | U2SURP  | 1 | 1 | 1 | 3 |
| hsa-miR-106a-5p | U2SURP  | 1 | 1 | 1 | 3 |
| hsa-miR-548d-3p | U2SURP  | 1 | 1 | 1 | 3 |
| hsa-miR-3187-3p | U2AF2   | 1 | 1 | 1 | 3 |
| hsa-miR-3161    | TYRP1   | 1 | 1 | 1 | 3 |
| hsa-miR-20b-5p  | TXNIP   | 1 | 1 | 1 | 3 |
| hsa-miR-106a-5p | TXNIP   | 1 | 1 | 1 | 3 |
| hsa-miR-20b-5p  | TXLNA   | 1 | 1 | 1 | 3 |
| hsa-miR-18a-5p  | TWF1    | 1 | 1 | 1 | 3 |
| hsa-miR-20b-5p  | TWF1    | 1 | 1 | 1 | 3 |
| hsa-miR-18b-5p  | TWF1    | 1 | 1 | 1 | 3 |
| hsa-miR-363-3p  | TWF1    | 1 | 1 | 1 | 3 |
| hsa-miR-363-3p  | TULP4   | 1 | 1 | 1 | 3 |
| hsa-miR-200b-3p | TUBB2A  | 1 | 1 | 1 | 3 |
| hsa-miR-429     | TUBB2A  | 1 | 1 | 1 | 3 |
| hsa-miR-200c-3p | TUBB2A  | 1 | 1 | 1 | 3 |
| hsa-miR-940     | TUB     | 1 | 1 | 1 | 3 |
| hsa-miR-556-5p  | TTC33   | 1 | 1 | 1 | 3 |
| hsa-miR-3065-5p | TTC26   | 1 | 1 | 1 | 3 |
| hsa-miR-548f-3p | TTC26   | 1 | 1 | 1 | 3 |
| hsa-miR-548d-3p | TSPAN3  | 1 | 1 | 1 | 3 |
| hsa-miR-577     | TSNAX   | 1 | 1 | 1 | 3 |
| hsa-miR-449b-5p | TSN     | 1 | 1 | 1 | 3 |
| hsa-miR-449a    | TSN     | 1 | 1 | 1 | 3 |
| hsa-miR-96-5p   | TSKU    | 1 | 1 | 1 | 3 |
| hsa-miR-20b-5p  | TSG101  | 1 | 1 | 1 | 3 |
| hsa-miR-106a-5p | TSG101  | 1 | 1 | 1 | 3 |
| hsa-miR-203a-5p | TSC22D2 | 1 | 1 | 1 | 3 |
| hsa-miR-767-5p  | TRPS1   | 1 | 1 | 1 | 3 |
| hsa-miR-9-5p    | TRPM7   | 1 | 1 | 1 | 3 |
| hsa-miR-301b-3p | TRPC3   | 1 | 1 | 1 | 3 |
| hsa-miR-130b-3p | TRPC3   | 1 | 1 | 1 | 3 |
| hsa-miR-301b-3p | TROVE2  | 1 | 1 | 1 | 3 |
| hsa-miR-130b-3p | TROVE2  | 1 | 1 | 1 | 3 |
| hsa-miR-205-3p  | TROVE2  | 1 | 1 | 1 | 3 |
| hsa-miR-548f-3p | TRMT5   | 1 | 1 | 1 | 3 |
| hsa-miR-7-5p    | TRMT13  | 1 | 1 | 1 | 3 |
| hsa-miR-106a-5p | TRIP10  | 1 | 1 | 1 | 3 |
| hsa-miR-20b-5p  | TRIP10  | 1 | 1 | 1 | 3 |
| hsa-miR-526b-5p | TRIM66  | 1 | 1 | 1 | 3 |
| hsa-miR-934     | TRIM42  | 1 | 1 | 1 | 3 |



|                 |          |   |   |   |   |
|-----------------|----------|---|---|---|---|
| hsa-miR-877-3p  | TRIM39   | 1 | 1 | 1 | 3 |
| hsa-miR-20b-5p  | TRIM37   | 1 | 1 | 1 | 3 |
| hsa-miR-130b-3p | TRIM37   | 1 | 1 | 1 | 3 |
| hsa-miR-106a-5p | TRIM37   | 1 | 1 | 1 | 3 |
| hsa-miR-301b-3p | TRIM37   | 1 | 1 | 1 | 3 |
| hsa-miR-363-3p  | TRIM36   | 1 | 1 | 1 | 3 |
| hsa-miR-3923    | TRIM33   | 1 | 1 | 1 | 3 |
| hsa-miR-3619-5p | TRIM29   | 1 | 1 | 1 | 3 |
| hsa-miR-130b-3p | TRIM2    | 1 | 1 | 1 | 3 |
| hsa-miR-940     | TRIB3    | 1 | 1 | 1 | 3 |
| hsa-miR-96-5p   | TRIB3    | 1 | 1 | 1 | 3 |
| hsa-miR-200a-3p | TRAM1    | 1 | 1 | 1 | 3 |
| hsa-miR-138-5p  | TRAM1    | 1 | 1 | 1 | 3 |
| hsa-miR-141-3p  | TRAM1    | 1 | 1 | 1 | 3 |
| hsa-miR-146a-5p | TRAF6    | 1 | 1 | 1 | 3 |
| hsa-miR-3619-5p | TRAF1    | 1 | 1 | 1 | 3 |
| hsa-miR-940     | TRAF1    | 1 | 1 | 1 | 3 |
| hsa-miR-548j-5p | TRA2B    | 1 | 1 | 1 | 3 |
| hsa-miR-548y    | TRA2B    | 1 | 1 | 1 | 3 |
| hsa-miR-548d-3p | TRA2B    | 1 | 1 | 1 | 3 |
| hsa-miR-211-5p  | TPPP     | 1 | 1 | 1 | 3 |
| hsa-miR-363-3p  | TPPP     | 1 | 1 | 1 | 3 |
| hsa-miR-7-5p    | TPP1     | 1 | 1 | 1 | 3 |
| hsa-miR-363-5p  | TPM3     | 1 | 1 | 1 | 3 |
| hsa-miR-216b-5p | TPM3     | 1 | 1 | 1 | 3 |
| hsa-miR-1276    | TPM3     | 1 | 1 | 1 | 3 |
| hsa-miR-155-3p  | TPM1     | 1 | 1 | 1 | 3 |
| hsa-miR-7-5p    | TPGS2    | 1 | 1 | 1 | 3 |
| hsa-miR-429     | TPD52L1  | 1 | 1 | 1 | 3 |
| hsa-miR-200c-3p | TPD52L1  | 1 | 1 | 1 | 3 |
| hsa-miR-636     | TPD52    | 1 | 1 | 1 | 3 |
| hsa-miR-9-3p    | TPD52    | 1 | 1 | 1 | 3 |
| hsa-miR-449a    | TPCN2    | 1 | 1 | 1 | 3 |
| hsa-miR-138-5p  | TP53INP2 | 1 | 1 | 1 | 3 |
| hsa-miR-877-3p  | TP53INP2 | 1 | 1 | 1 | 3 |
| hsa-miR-182-5p  | TP53INP1 | 1 | 1 | 1 | 3 |
| hsa-miR-106a-5p | TP53INP1 | 1 | 1 | 1 | 3 |
| hsa-miR-20b-5p  | TP53INP1 | 1 | 1 | 1 | 3 |
| hsa-miR-3664-5p | TP53INP1 | 1 | 1 | 1 | 3 |
| hsa-miR-141-5p  | TOR3A    | 1 | 1 | 1 | 3 |
| hsa-miR-1283    | TOR1B    | 1 | 1 | 1 | 3 |
| hsa-miR-182-3p  | TOR1B    | 1 | 1 | 1 | 3 |
| hsa-miR-940     | TOR1AIP2 | 1 | 1 | 1 | 3 |
| hsa-miR-522-3p  | TOR1AIP1 | 1 | 1 | 1 | 3 |
| hsa-miR-20b-5p  | TOPORS   | 1 | 1 | 1 | 3 |
| hsa-miR-130b-3p | TOM1L2   | 1 | 1 | 1 | 3 |
| hsa-miR-6891-5p | TOB2     | 1 | 1 | 1 | 3 |
| hsa-miR-363-3p  | TOB1     | 1 | 1 | 1 | 3 |
| hsa-miR-1224-5p | TNS1     | 1 | 1 | 1 | 3 |
| hsa-miR-891b    | TNRC6B   | 1 | 1 | 1 | 3 |
| hsa-miR-130b-3p | TNRC6A   | 1 | 1 | 1 | 3 |
| hsa-miR-3170    | TNRC6A   | 1 | 1 | 1 | 3 |
| hsa-miR-122-5p  | TNRC6A   | 1 | 1 | 1 | 3 |
| hsa-miR-301b-3p | TNRC6A   | 1 | 1 | 1 | 3 |
| hsa-miR-7702    | TNPO1    | 1 | 1 | 1 | 3 |
| hsa-miR-512-3p  | TNKS2    | 1 | 1 | 1 | 3 |
| hsa-miR-141-3p  | TNKS2    | 1 | 1 | 1 | 3 |
| hsa-miR-20b-5p  | TNKS2    | 1 | 1 | 1 | 3 |

|                   |          |   |   |   |   |
|-------------------|----------|---|---|---|---|
| hsa-miR-106a-5p   | TNKS2    | 1 | 1 | 1 | 3 |
| hsa-miR-200a-3p   | TNKS2    | 1 | 1 | 1 | 3 |
| hsa-miR-3127-3p   | TNFSF8   | 1 | 1 | 1 | 3 |
| hsa-miR-20b-5p    | TNFRSF21 | 1 | 1 | 1 | 3 |
| hsa-miR-106a-5p   | TNFRSF21 | 1 | 1 | 1 | 3 |
| hsa-miR-3614-3p   | TNFAIP8  | 1 | 1 | 1 | 3 |
| hsa-miR-940       | TNFAIP2  | 1 | 1 | 1 | 3 |
| hsa-miR-20b-5p    | TNFAIP1  | 1 | 1 | 1 | 3 |
| hsa-miR-215-5p    | TMTC3    | 1 | 1 | 1 | 3 |
| hsa-miR-211-5p    | TMTC2    | 1 | 1 | 1 | 3 |
| hsa-miR-526b-5p   | TMPRSS15 | 1 | 1 | 1 | 3 |
| hsa-miR-215-5p    | TMPO     | 1 | 1 | 1 | 3 |
| hsa-miR-363-3p    | TMF1     | 1 | 1 | 1 | 3 |
| hsa-miR-577       | TMEM98   | 1 | 1 | 1 | 3 |
| hsa-miR-7-5p      | TMEM97   | 1 | 1 | 1 | 3 |
| hsa-miR-629-3p    | TMEM87B  | 1 | 1 | 1 | 3 |
| hsa-miR-6854-5p   | TMEM81   | 1 | 1 | 1 | 3 |
| hsa-miR-7-5p      | TMEM69   | 1 | 1 | 1 | 3 |
| hsa-miR-106a-5p   | TMEM64   | 1 | 1 | 1 | 3 |
| hsa-miR-548d-3p   | TMEM64   | 1 | 1 | 1 | 3 |
| hsa-miR-20b-5p    | TMEM64   | 1 | 1 | 1 | 3 |
| hsa-miR-3161      | TMEM47   | 1 | 1 | 1 | 3 |
| hsa-miR-7-5p      | TMEM43   | 1 | 1 | 1 | 3 |
| hsa-miR-548y      | TMEM41B  | 1 | 1 | 1 | 3 |
| hsa-miR-548j-5p   | TMEM41B  | 1 | 1 | 1 | 3 |
| hsa-miR-1224-5p   | TMEM30B  | 1 | 1 | 1 | 3 |
| hsa-miR-636       | TMEM25   | 1 | 1 | 1 | 3 |
| hsa-miR-3619-5p   | TMEM248  | 1 | 1 | 1 | 3 |
| hsa-miR-548f-3p   | TMEM245  | 1 | 1 | 1 | 3 |
| hsa-miR-20b-5p    | TMEM245  | 1 | 1 | 1 | 3 |
| hsa-miR-18a-5p    | TMEM2    | 1 | 1 | 1 | 3 |
| hsa-miR-18b-5p    | TMEM2    | 1 | 1 | 1 | 3 |
| hsa-miR-3189-3p   | TMEM178f | 1 | 1 | 1 | 3 |
| hsa-miR-96-5p     | TMEM170f | 1 | 1 | 1 | 3 |
| hsa-miR-1248      | TMEM170f | 1 | 1 | 1 | 3 |
| hsa-miR-6499-3p   | TMEM167j | 1 | 1 | 1 | 3 |
| hsa-miR-20b-5p    | TMEM167j | 1 | 1 | 1 | 3 |
| hsa-miR-449c-5p   | TMEM167j | 1 | 1 | 1 | 3 |
| hsa-miR-548d-3p   | TMEM158  | 1 | 1 | 1 | 3 |
| hsa-miR-1248      | TMEM138  | 1 | 1 | 1 | 3 |
| hsa-miR-106a-5p   | TMEM127  | 1 | 1 | 1 | 3 |
| hsa-miR-20b-5p    | TMEM127  | 1 | 1 | 1 | 3 |
| hsa-miR-449b-3p   | TMEM127  | 1 | 1 | 1 | 3 |
| hsa-miR-20b-5p    | TMEM123  | 1 | 1 | 1 | 3 |
| hsa-miR-3619-5p   | TMED9    | 1 | 1 | 1 | 3 |
| hsa-miR-183-5p    | TMED7    | 1 | 1 | 1 | 3 |
| hsa-miR-449b-3p   | TMED3    | 1 | 1 | 1 | 3 |
| hsa-miR-219a-2-3p | TMED2    | 1 | 1 | 1 | 3 |
| hsa-miR-215-5p    | TMED10   | 1 | 1 | 1 | 3 |
| hsa-miR-20b-5p    | TMBIM6   | 1 | 1 | 1 | 3 |
| hsa-miR-216b-5p   | TM9SF3   | 1 | 1 | 1 | 3 |
| hsa-miR-7-5p      | TLR4     | 1 | 1 | 1 | 3 |
| hsa-miR-93-3p     | TLK2     | 1 | 1 | 1 | 3 |
| hsa-miR-105-5p    | TJP1     | 1 | 1 | 1 | 3 |
| hsa-miR-141-3p    | TIAM1    | 1 | 1 | 1 | 3 |
| hsa-miR-425-5p    | THRB     | 1 | 1 | 1 | 3 |
| hsa-miR-15b-3p    | THRB     | 1 | 1 | 1 | 3 |
| hsa-miR-130b-3p   | THOP1    | 1 | 1 | 1 | 3 |

|                   |          |   |   |   |   |
|-------------------|----------|---|---|---|---|
| hsa-miR-3065-5p   | THBS1    | 1 | 1 | 1 | 3 |
| hsa-miR-182-5p    | THBS1    | 1 | 1 | 1 | 3 |
| hsa-miR-200a-5p   | THAP5    | 1 | 1 | 1 | 3 |
| hsa-miR-527       | TGOLN2   | 1 | 1 | 1 | 3 |
| hsa-miR-6854-5p   | TGOLN2   | 1 | 1 | 1 | 3 |
| hsa-miR-518a-5p   | TGOLN2   | 1 | 1 | 1 | 3 |
| hsa-miR-548d-3p   | TGIF2    | 1 | 1 | 1 | 3 |
| hsa-miR-122-5p    | TGFBRAP1 | 1 | 1 | 1 | 3 |
| hsa-miR-211-5p    | TGFBR2   | 1 | 1 | 1 | 3 |
| hsa-miR-20b-5p    | TGFBR2   | 1 | 1 | 1 | 3 |
| hsa-miR-106a-5p   | TGFBR2   | 1 | 1 | 1 | 3 |
| hsa-miR-301b-3p   | TGFBR2   | 1 | 1 | 1 | 3 |
| hsa-miR-130b-3p   | TGFBR2   | 1 | 1 | 1 | 3 |
| hsa-miR-9-5p      | TGFBR2   | 1 | 1 | 1 | 3 |
| hsa-miR-1283      | TGFBR1   | 1 | 1 | 1 | 3 |
| hsa-miR-135b-5p   | TGFBR1   | 1 | 1 | 1 | 3 |
| hsa-miR-9-5p      | TGFBI    | 1 | 1 | 1 | 3 |
| hsa-miR-141-3p    | TGFB2    | 1 | 1 | 1 | 3 |
| hsa-miR-130b-5p   | TFRC     | 1 | 1 | 1 | 3 |
| hsa-miR-141-3p    | TFDP2    | 1 | 1 | 1 | 3 |
| hsa-miR-3619-5p   | TFAP2C   | 1 | 1 | 1 | 3 |
| hsa-miR-629-3p    | TFAP2A   | 1 | 1 | 1 | 3 |
| hsa-miR-203b-3p   | TFAM     | 1 | 1 | 1 | 3 |
| hsa-miR-3150b-3p  | TEX261   | 1 | 1 | 1 | 3 |
| hsa-miR-6891-5p   | TEX261   | 1 | 1 | 1 | 3 |
| hsa-miR-629-3p    | TET3     | 1 | 1 | 1 | 3 |
| hsa-miR-20b-5p    | TET3     | 1 | 1 | 1 | 3 |
| hsa-miR-9-5p      | TESK2    | 1 | 1 | 1 | 3 |
| hsa-miR-548f-3p   | TERF2IP  | 1 | 1 | 1 | 3 |
| hsa-miR-3664-5p   | TERF1    | 1 | 1 | 1 | 3 |
| hsa-miR-363-3p    | TEF      | 1 | 1 | 1 | 3 |
| hsa-miR-93-3p     | TECPR2   | 1 | 1 | 1 | 3 |
| hsa-miR-215-5p    | TCF7     | 1 | 1 | 1 | 3 |
| hsa-miR-130b-3p   | TCF4     | 1 | 1 | 1 | 3 |
| hsa-miR-211-5p    | TCF12    | 1 | 1 | 1 | 3 |
| hsa-miR-182-5p    | TCEAL7   | 1 | 1 | 1 | 3 |
| hsa-miR-31-5p     | TBXA2R   | 1 | 1 | 1 | 3 |
| hsa-miR-9-5p      | TBPL1    | 1 | 1 | 1 | 3 |
| hsa-miR-18b-5p    | TBPL1    | 1 | 1 | 1 | 3 |
| hsa-miR-3619-5p   | TBPL1    | 1 | 1 | 1 | 3 |
| hsa-miR-18a-5p    | TBPL1    | 1 | 1 | 1 | 3 |
| hsa-miR-767-5p    | TBL1XR1  | 1 | 1 | 1 | 3 |
| hsa-miR-548f-3p   | TBL1XR1  | 1 | 1 | 1 | 3 |
| hsa-miR-7705      | TBL1XR1  | 1 | 1 | 1 | 3 |
| hsa-miR-219a-2-3p | TBK1     | 1 | 1 | 1 | 3 |
| hsa-miR-200c-3p   | TBK1     | 1 | 1 | 1 | 3 |
| hsa-miR-200b-3p   | TBK1     | 1 | 1 | 1 | 3 |
| hsa-miR-429       | TBK1     | 1 | 1 | 1 | 3 |
| hsa-miR-940       | TBC1D9B  | 1 | 1 | 1 | 3 |
| hsa-miR-363-3p    | TBC1D8   | 1 | 1 | 1 | 3 |
| hsa-miR-888-5p    | TBC1D15  | 1 | 1 | 1 | 3 |
| hsa-miR-93-3p     | TARDBP   | 1 | 1 | 1 | 3 |
| hsa-miR-18a-5p    | TAOK1    | 1 | 1 | 1 | 3 |
| hsa-miR-4665-5p   | TAOK1    | 1 | 1 | 1 | 3 |
| hsa-miR-18b-5p    | TAOK1    | 1 | 1 | 1 | 3 |
| hsa-miR-20b-5p    | TANC1    | 1 | 1 | 1 | 3 |
| hsa-miR-449b-3p   | TAGLN2   | 1 | 1 | 1 | 3 |
| hsa-miR-6844      | TAF2     | 1 | 1 | 1 | 3 |

|                 |          |   |   |   |   |
|-----------------|----------|---|---|---|---|
| hsa-miR-20b-5p  | TADA2B   | 1 | 1 | 1 | 3 |
| hsa-miR-940     | SYT15    | 1 | 1 | 1 | 3 |
| hsa-miR-3065-5p | SYPL1    | 1 | 1 | 1 | 3 |
| hsa-miR-522-3p  | SYNM     | 1 | 1 | 1 | 3 |
| hsa-miR-3662    | SYNM     | 1 | 1 | 1 | 3 |
| hsa-miR-6844    | SYNJ2BP  | 1 | 1 | 1 | 3 |
| hsa-miR-211-5p  | SYNJ2BP  | 1 | 1 | 1 | 3 |
| hsa-miR-425-5p  | SYNCRIP  | 1 | 1 | 1 | 3 |
| hsa-miR-200c-5p | SYNCRIP  | 1 | 1 | 1 | 3 |
| hsa-miR-31-5p   | SYDE2    | 1 | 1 | 1 | 3 |
| hsa-miR-3065-5p | SYDE2    | 1 | 1 | 1 | 3 |
| hsa-miR-130b-3p | SYBU     | 1 | 1 | 1 | 3 |
| hsa-miR-9-5p    | SYAP1    | 1 | 1 | 1 | 3 |
| hsa-miR-1266-5p | SV2B     | 1 | 1 | 1 | 3 |
| hsa-miR-200b-3p | SUZ12    | 1 | 1 | 1 | 3 |
| hsa-miR-548d-3p | SUZ12    | 1 | 1 | 1 | 3 |
| hsa-miR-200c-3p | SUZ12    | 1 | 1 | 1 | 3 |
| hsa-miR-3934-3p | SUSD2    | 1 | 1 | 1 | 3 |
| hsa-miR-93-3p   | SUFU     | 1 | 1 | 1 | 3 |
| hsa-miR-106a-5p | SUCO     | 1 | 1 | 1 | 3 |
| hsa-miR-183-5p  | SUCO     | 1 | 1 | 1 | 3 |
| hsa-miR-20b-5p  | SUCO     | 1 | 1 | 1 | 3 |
| hsa-miR-215-5p  | STX7     | 1 | 1 | 1 | 3 |
| hsa-miR-301b-3p | STX6     | 1 | 1 | 1 | 3 |
| hsa-miR-20b-5p  | STX6     | 1 | 1 | 1 | 3 |
| hsa-miR-130b-3p | STX6     | 1 | 1 | 1 | 3 |
| hsa-miR-210-5p  | STX17    | 1 | 1 | 1 | 3 |
| hsa-miR-629-3p  | STMN1    | 1 | 1 | 1 | 3 |
| hsa-miR-940     | STK40    | 1 | 1 | 1 | 3 |
| hsa-miR-3934-3p | STK40    | 1 | 1 | 1 | 3 |
| hsa-miR-31-5p   | STK40    | 1 | 1 | 1 | 3 |
| hsa-miR-4724-5p | STK4     | 1 | 1 | 1 | 3 |
| hsa-miR-3934-3p | STK4     | 1 | 1 | 1 | 3 |
| hsa-miR-18a-5p  | STK4     | 1 | 1 | 1 | 3 |
| hsa-miR-205-5p  | STK38L   | 1 | 1 | 1 | 3 |
| hsa-miR-9-5p    | STK3     | 1 | 1 | 1 | 3 |
| hsa-miR-96-5p   | STK17B   | 1 | 1 | 1 | 3 |
| hsa-miR-20b-5p  | STK17B   | 1 | 1 | 1 | 3 |
| hsa-miR-940     | STEAP2   | 1 | 1 | 1 | 3 |
| hsa-miR-629-3p  | STC2     | 1 | 1 | 1 | 3 |
| hsa-miR-891a-5p | STC2     | 1 | 1 | 1 | 3 |
| hsa-miR-141-3p  | STAT4    | 1 | 1 | 1 | 3 |
| hsa-miR-20b-5p  | STAT3    | 1 | 1 | 1 | 3 |
| hsa-miR-106a-5p | STAT3    | 1 | 1 | 1 | 3 |
| hsa-miR-3176    | STARD7   | 1 | 1 | 1 | 3 |
| hsa-miR-1276    | STARD3NL | 1 | 1 | 1 | 3 |
| hsa-miR-548f-3p | STARD3NL | 1 | 1 | 1 | 3 |
| hsa-miR-940     | STARD3   | 1 | 1 | 1 | 3 |
| hsa-miR-301b-3p | STARD13  | 1 | 1 | 1 | 3 |
| hsa-miR-183-3p  | STARD13  | 1 | 1 | 1 | 3 |
| hsa-miR-130b-3p | STARD13  | 1 | 1 | 1 | 3 |
| hsa-miR-6499-3p | ST3GAL5  | 1 | 1 | 1 | 3 |
| hsa-miR-526b-5p | ST13     | 1 | 1 | 1 | 3 |
| hsa-miR-449a    | SSX5     | 1 | 1 | 1 | 3 |
| hsa-miR-20b-5p  | SSX2IP   | 1 | 1 | 1 | 3 |
| hsa-miR-211-5p  | SSRP1    | 1 | 1 | 1 | 3 |
| hsa-miR-3189-3p | SSRP1    | 1 | 1 | 1 | 3 |
| hsa-miR-940     | SSR1     | 1 | 1 | 1 | 3 |



|                  |          |   |   |   |   |
|------------------|----------|---|---|---|---|
| hsa-miR-6891-5p  | SSPN     | 1 | 1 | 1 | 3 |
| hsa-miR-363-3p   | SSFA2    | 1 | 1 | 1 | 3 |
| hsa-miR-4745-3p  | SRSF2    | 1 | 1 | 1 | 3 |
| hsa-miR-183-5p   | SRSF2    | 1 | 1 | 1 | 3 |
| hsa-miR-1304-3p  | SRSF2    | 1 | 1 | 1 | 3 |
| hsa-miR-183-3p   | SRSF1    | 1 | 1 | 1 | 3 |
| hsa-miR-6715b-3p | SRP9     | 1 | 1 | 1 | 3 |
| hsa-miR-3662     | SRGAP2   | 1 | 1 | 1 | 3 |
| hsa-miR-3187-3p  | SREK1IP1 | 1 | 1 | 1 | 3 |
| hsa-miR-3664-3p  | SRCIN1   | 1 | 1 | 1 | 3 |
| hsa-miR-877-3p   | SRCIN1   | 1 | 1 | 1 | 3 |
| hsa-miR-20b-5p   | SQSTM1   | 1 | 1 | 1 | 3 |
| hsa-miR-205-5p   | SQLE     | 1 | 1 | 1 | 3 |
| hsa-miR-7-5p     | SPTY2D1  | 1 | 1 | 1 | 3 |
| hsa-miR-7-5p     | SPTSSB   | 1 | 1 | 1 | 3 |
| hsa-miR-210-5p   | SPTLC2   | 1 | 1 | 1 | 3 |
| hsa-miR-18a-3p   | SPTBN2   | 1 | 1 | 1 | 3 |
| hsa-miR-363-3p   | SPRYD4   | 1 | 1 | 1 | 3 |
| hsa-miR-20b-5p   | SPRED1   | 1 | 1 | 1 | 3 |
| hsa-miR-106a-5p  | SPRED1   | 1 | 1 | 1 | 3 |
| hsa-miR-138-1-3p | SPRED1   | 1 | 1 | 1 | 3 |
| hsa-miR-425-5p   | SPPL2A   | 1 | 1 | 1 | 3 |
| hsa-miR-20b-5p   | SPOPL    | 1 | 1 | 1 | 3 |
| hsa-miR-130b-3p  | SPOPL    | 1 | 1 | 1 | 3 |
| hsa-miR-211-5p   | SPOP     | 1 | 1 | 1 | 3 |
| hsa-miR-301b-3p  | SPG20    | 1 | 1 | 1 | 3 |
| hsa-miR-130b-3p  | SPG20    | 1 | 1 | 1 | 3 |
| hsa-miR-548f-3p  | SPATS2L  | 1 | 1 | 1 | 3 |
| hsa-miR-130b-3p  | SPATA2   | 1 | 1 | 1 | 3 |
| hsa-miR-4724-5p  | SPATA2   | 1 | 1 | 1 | 3 |
| hsa-miR-7-5p     | SPATA2   | 1 | 1 | 1 | 3 |
| hsa-miR-629-3p   | SPATA2   | 1 | 1 | 1 | 3 |
| hsa-miR-3065-5p  | SPATA13  | 1 | 1 | 1 | 3 |
| hsa-miR-9-5p     | SPAG9    | 1 | 1 | 1 | 3 |
| hsa-miR-3176     | SP4      | 1 | 1 | 1 | 3 |
| hsa-miR-211-5p   | SP1      | 1 | 1 | 1 | 3 |
| hsa-miR-31-5p    | SP1      | 1 | 1 | 1 | 3 |
| hsa-miR-20b-5p   | SOX4     | 1 | 1 | 1 | 3 |
| hsa-miR-138-5p   | SOX4     | 1 | 1 | 1 | 3 |
| hsa-miR-106a-5p  | SOX4     | 1 | 1 | 1 | 3 |
| hsa-miR-130b-3p  | SOX4     | 1 | 1 | 1 | 3 |
| hsa-miR-301b-3p  | SOX4     | 1 | 1 | 1 | 3 |
| hsa-miR-363-3p   | SOX4     | 1 | 1 | 1 | 3 |
| hsa-miR-363-3p   | SOX11    | 1 | 1 | 1 | 3 |
| hsa-miR-3065-5p  | SOX1     | 1 | 1 | 1 | 3 |
| hsa-miR-1283     | SOD2     | 1 | 1 | 1 | 3 |
| hsa-miR-431-5p   | SOCS6    | 1 | 1 | 1 | 3 |
| hsa-miR-216b-5p  | SOCS6    | 1 | 1 | 1 | 3 |
| hsa-miR-9-5p     | SOCS5    | 1 | 1 | 1 | 3 |
| hsa-miR-203b-3p  | SOCS5    | 1 | 1 | 1 | 3 |
| hsa-miR-3619-5p  | SOCS5    | 1 | 1 | 1 | 3 |
| hsa-miR-548d-3p  | SOAT1    | 1 | 1 | 1 | 3 |
| hsa-miR-96-5p    | SNX7     | 1 | 1 | 1 | 3 |
| hsa-miR-9-5p     | SNX7     | 1 | 1 | 1 | 3 |
| hsa-miR-518a-5p  | SNX5     | 1 | 1 | 1 | 3 |
| hsa-miR-141-5p   | SNX5     | 1 | 1 | 1 | 3 |
| hsa-miR-527      | SNX5     | 1 | 1 | 1 | 3 |
| hsa-miR-3662     | SNX19    | 1 | 1 | 1 | 3 |

|                 |          |   |   |   |   |
|-----------------|----------|---|---|---|---|
| hsa-miR-96-5p   | SNX16    | 1 | 1 | 1 | 3 |
| hsa-miR-1226-3p | SNX13    | 1 | 1 | 1 | 3 |
| hsa-miR-3616-3p | SNX12    | 1 | 1 | 1 | 3 |
| hsa-miR-20b-5p  | SNTB2    | 1 | 1 | 1 | 3 |
| hsa-miR-3065-5p | SNRK     | 1 | 1 | 1 | 3 |
| hsa-miR-7-5p    | SNCA     | 1 | 1 | 1 | 3 |
| hsa-miR-431-5p  | SNAP29   | 1 | 1 | 1 | 3 |
| hsa-miR-7-5p    | SNAP29   | 1 | 1 | 1 | 3 |
| hsa-miR-93-3p   | SMURF2   | 1 | 1 | 1 | 3 |
| hsa-miR-363-3p  | SMU1     | 1 | 1 | 1 | 3 |
| hsa-miR-130b-3p | SMOC1    | 1 | 1 | 1 | 3 |
| hsa-miR-301b-3p | SMOC1    | 1 | 1 | 1 | 3 |
| hsa-miR-20b-5p  | SMOC1    | 1 | 1 | 1 | 3 |
| hsa-miR-106a-5p | SMOC1    | 1 | 1 | 1 | 3 |
| hsa-miR-141-5p  | SMIM17   | 1 | 1 | 1 | 3 |
| hsa-miR-7974    | SMG1     | 1 | 1 | 1 | 3 |
| hsa-miR-96-3p   | SMC2     | 1 | 1 | 1 | 3 |
| hsa-miR-940     | SMARCD1  | 1 | 1 | 1 | 3 |
| hsa-miR-7-5p    | SMARCD1  | 1 | 1 | 1 | 3 |
| hsa-miR-548f-3p | SMARCAD  | 1 | 1 | 1 | 3 |
| hsa-miR-135b-5p | SMAD5    | 1 | 1 | 1 | 3 |
| hsa-miR-548y    | SMAD5    | 1 | 1 | 1 | 3 |
| hsa-miR-548j-5p | SMAD5    | 1 | 1 | 1 | 3 |
| hsa-miR-20b-5p  | SMAD5    | 1 | 1 | 1 | 3 |
| hsa-miR-449b-5p | SMAD4    | 1 | 1 | 1 | 3 |
| hsa-miR-449a    | SMAD4    | 1 | 1 | 1 | 3 |
| hsa-miR-216b-5p | SMAD1    | 1 | 1 | 1 | 3 |
| hsa-miR-363-3p  | SLX4     | 1 | 1 | 1 | 3 |
| hsa-miR-130b-3p | SLMAP    | 1 | 1 | 1 | 3 |
| hsa-miR-20b-5p  | SLK      | 1 | 1 | 1 | 3 |
| hsa-miR-122-5p  | SLC9A1   | 1 | 1 | 1 | 3 |
| hsa-miR-489-3p  | SLC7A11  | 1 | 1 | 1 | 3 |
| hsa-miR-122-5p  | SLC7A1   | 1 | 1 | 1 | 3 |
| hsa-miR-3616-3p | SLC6A9   | 1 | 1 | 1 | 3 |
| hsa-miR-7-5p    | SLC6A9   | 1 | 1 | 1 | 3 |
| hsa-miR-3662    | SLC6A8   | 1 | 1 | 1 | 3 |
| hsa-miR-122-5p  | SLC52A2  | 1 | 1 | 1 | 3 |
| hsa-miR-18a-3p  | SLC46A1  | 1 | 1 | 1 | 3 |
| hsa-miR-130b-3p | SLC44A1  | 1 | 1 | 1 | 3 |
| hsa-miR-1283    | SLC44A1  | 1 | 1 | 1 | 3 |
| hsa-miR-211-5p  | SLC43A1  | 1 | 1 | 1 | 3 |
| hsa-miR-211-5p  | SLC39A9  | 1 | 1 | 1 | 3 |
| hsa-miR-1226-3p | SLC39A9  | 1 | 1 | 1 | 3 |
| hsa-miR-522-3p  | SLC39A9  | 1 | 1 | 1 | 3 |
| hsa-miR-9-5p    | SLC39A14 | 1 | 1 | 1 | 3 |
| hsa-miR-96-5p   | SLC39A1  | 1 | 1 | 1 | 3 |
| hsa-miR-1269a   | SLC38A2  | 1 | 1 | 1 | 3 |
| hsa-miR-767-5p  | SLC36A1  | 1 | 1 | 1 | 3 |
| hsa-miR-4724-5p | SLC35G2  | 1 | 1 | 1 | 3 |
| hsa-miR-512-3p  | SLC35F6  | 1 | 1 | 1 | 3 |
| hsa-miR-940     | SLC35F6  | 1 | 1 | 1 | 3 |
| hsa-miR-940     | SLC35E2  | 1 | 1 | 1 | 3 |
| hsa-miR-141-3p  | SLC35D1  | 1 | 1 | 1 | 3 |
| hsa-miR-200a-3p | SLC35D1  | 1 | 1 | 1 | 3 |
| hsa-miR-130b-3p | SLC35D1  | 1 | 1 | 1 | 3 |
| hsa-miR-3664-5p | SLC35B4  | 1 | 1 | 1 | 3 |
| hsa-miR-9-5p    | SLC35B3  | 1 | 1 | 1 | 3 |
| hsa-miR-31-3p   | SLC30A5  | 1 | 1 | 1 | 3 |

|                   |          |   |   |   |   |
|-------------------|----------|---|---|---|---|
| hsa-miR-449c-5p   | SLC29A1  | 1 | 1 | 1 | 3 |
| hsa-miR-3150b-3p  | SLC26A9  | 1 | 1 | 1 | 3 |
| hsa-miR-130b-5p   | SLC26A7  | 1 | 1 | 1 | 3 |
| hsa-miR-940       | SLC25A45 | 1 | 1 | 1 | 3 |
| hsa-miR-363-3p    | SLC25A36 | 1 | 1 | 1 | 3 |
| hsa-miR-363-3p    | SLC25A32 | 1 | 1 | 1 | 3 |
| hsa-miR-96-5p     | SLC25A25 | 1 | 1 | 1 | 3 |
| hsa-miR-7-5p      | SLC25A15 | 1 | 1 | 1 | 3 |
| hsa-miR-211-5p    | SLC22A6  | 1 | 1 | 1 | 3 |
| hsa-miR-20b-5p    | SLC22A23 | 1 | 1 | 1 | 3 |
| hsa-miR-106a-5p   | SLC22A23 | 1 | 1 | 1 | 3 |
| hsa-miR-96-5p     | SLC1A1   | 1 | 1 | 1 | 3 |
| hsa-miR-940       | SLC17A5  | 1 | 1 | 1 | 3 |
| hsa-miR-20b-5p    | SLC16A9  | 1 | 1 | 1 | 3 |
| hsa-miR-5684      | SLC16A9  | 1 | 1 | 1 | 3 |
| hsa-miR-891b      | SLC16A6  | 1 | 1 | 1 | 3 |
| hsa-miR-6815-3p   | SLC16A1  | 1 | 1 | 1 | 3 |
| hsa-miR-425-5p    | SLC16A1  | 1 | 1 | 1 | 3 |
| hsa-miR-301b-3p   | SLC12A7  | 1 | 1 | 1 | 3 |
| hsa-miR-130b-3p   | SLC12A7  | 1 | 1 | 1 | 3 |
| hsa-miR-363-3p    | SLC12A5  | 1 | 1 | 1 | 3 |
| hsa-miR-577       | SLC10A7  | 1 | 1 | 1 | 3 |
| hsa-miR-20b-5p    | SLAIN2   | 1 | 1 | 1 | 3 |
| hsa-miR-130b-3p   | SLAIN1   | 1 | 1 | 1 | 3 |
| hsa-miR-1301-3p   | SKIL     | 1 | 1 | 1 | 3 |
| hsa-miR-548f-3p   | SKIL     | 1 | 1 | 1 | 3 |
| hsa-miR-548j-5p   | SIX4     | 1 | 1 | 1 | 3 |
| hsa-miR-548y      | SIX4     | 1 | 1 | 1 | 3 |
| hsa-miR-130b-3p   | SIX4     | 1 | 1 | 1 | 3 |
| hsa-miR-138-5p    | SIRT1    | 1 | 1 | 1 | 3 |
| hsa-miR-9-5p      | SIRT1    | 1 | 1 | 1 | 3 |
| hsa-miR-4763-5p   | SIN3B    | 1 | 1 | 1 | 3 |
| hsa-miR-96-5p     | SIN3B    | 1 | 1 | 1 | 3 |
| hsa-miR-210-3p    | SIN3A    | 1 | 1 | 1 | 3 |
| hsa-miR-1229-3p   | SIK2     | 1 | 1 | 1 | 3 |
| hsa-miR-548y      | SIK1     | 1 | 1 | 1 | 3 |
| hsa-miR-20b-5p    | SIK1     | 1 | 1 | 1 | 3 |
| hsa-miR-548j-5p   | SIK1     | 1 | 1 | 1 | 3 |
| hsa-miR-130b-3p   | SIK1     | 1 | 1 | 1 | 3 |
| hsa-miR-106a-5p   | SIK1     | 1 | 1 | 1 | 3 |
| hsa-miR-301b-3p   | SIK1     | 1 | 1 | 1 | 3 |
| hsa-miR-20b-5p    | SHOC2    | 1 | 1 | 1 | 3 |
| hsa-miR-219a-2-3p | SHOC2    | 1 | 1 | 1 | 3 |
| hsa-miR-106a-5p   | SHOC2    | 1 | 1 | 1 | 3 |
| hsa-miR-203b-3p   | SHOC2    | 1 | 1 | 1 | 3 |
| hsa-miR-3662      | SHISA9   | 1 | 1 | 1 | 3 |
| hsa-miR-205-5p    | SHISA6   | 1 | 1 | 1 | 3 |
| hsa-miR-200c-3p   | SHCBP1   | 1 | 1 | 1 | 3 |
| hsa-miR-429       | SHCBP1   | 1 | 1 | 1 | 3 |
| hsa-miR-3662      | SH3TC2   | 1 | 1 | 1 | 3 |
| hsa-miR-3189-3p   | SH3PXD2A | 1 | 1 | 1 | 3 |
| hsa-miR-211-5p    | SH3PXD2A | 1 | 1 | 1 | 3 |
| hsa-miR-767-5p    | SH3GLB1  | 1 | 1 | 1 | 3 |
| hsa-miR-183-5p    | SH3D19   | 1 | 1 | 1 | 3 |
| hsa-miR-210-3p    | SH3BGRL  | 1 | 1 | 1 | 3 |
| hsa-miR-548y      | SH3BGRL  | 1 | 1 | 1 | 3 |
| hsa-miR-106a-5p   | SGTB     | 1 | 1 | 1 | 3 |
| hsa-miR-3187-3p   | SGTB     | 1 | 1 | 1 | 3 |

|                 |           |   |   |   |   |
|-----------------|-----------|---|---|---|---|
| hsa-miR-629-3p  | SGTB      | 1 | 1 | 1 | 3 |
| hsa-miR-20b-5p  | SGTB      | 1 | 1 | 1 | 3 |
| hsa-miR-211-5p  | SGPL1     | 1 | 1 | 1 | 3 |
| hsa-miR-1226-3p | SGPL1     | 1 | 1 | 1 | 3 |
| hsa-miR-3662    | SGK1      | 1 | 1 | 1 | 3 |
| hsa-miR-767-5p  | SFT2D3    | 1 | 1 | 1 | 3 |
| hsa-miR-141-3p  | SFPQ      | 1 | 1 | 1 | 3 |
| hsa-miR-449a    | SF3B3     | 1 | 1 | 1 | 3 |
| hsa-miR-577     | SF1       | 1 | 1 | 1 | 3 |
| hsa-miR-3934-5p | SETX      | 1 | 1 | 1 | 3 |
| hsa-miR-1229-3p | SETD7     | 1 | 1 | 1 | 3 |
| hsa-miR-4665-5p | SETD1B    | 1 | 1 | 1 | 3 |
| hsa-miR-6891-5p | SET       | 1 | 1 | 1 | 3 |
| hsa-miR-3662    | SET       | 1 | 1 | 1 | 3 |
| hsa-miR-130b-3p | SESTD1    | 1 | 1 | 1 | 3 |
| hsa-miR-20b-5p  | SESN3     | 1 | 1 | 1 | 3 |
| hsa-miR-205-3p  | SESN3     | 1 | 1 | 1 | 3 |
| hsa-miR-106a-5p | SESN3     | 1 | 1 | 1 | 3 |
| hsa-miR-363-3p  | SESN3     | 1 | 1 | 1 | 3 |
| hsa-miR-182-5p  | SESN2     | 1 | 1 | 1 | 3 |
| hsa-miR-210-3p  | SERTM1    | 1 | 1 | 1 | 3 |
| hsa-miR-577     | SERTAD3   | 1 | 1 | 1 | 3 |
| hsa-miR-363-3p  | SERTAD3   | 1 | 1 | 1 | 3 |
| hsa-miR-7-5p    | SERP1     | 1 | 1 | 1 | 3 |
| hsa-miR-9-5p    | SERINC5   | 1 | 1 | 1 | 3 |
| hsa-miR-211-5p  | SERINC3   | 1 | 1 | 1 | 3 |
| hsa-miR-130b-3p | SERINC3   | 1 | 1 | 1 | 3 |
| hsa-miR-301b-3p | SERINC3   | 1 | 1 | 1 | 3 |
| hsa-miR-548d-3p | SERBP1    | 1 | 1 | 1 | 3 |
| hsa-miR-3176    | SERAC1    | 1 | 1 | 1 | 3 |
| hsa-miR-20b-5p  | SEMA7A    | 1 | 1 | 1 | 3 |
| hsa-miR-106a-5p | SEMA7A    | 1 | 1 | 1 | 3 |
| hsa-miR-18a-3p  | SEMA4G    | 1 | 1 | 1 | 3 |
| hsa-miR-215-5p  | SEMA4D    | 1 | 1 | 1 | 3 |
| hsa-miR-138-5p  | SEMA4C    | 1 | 1 | 1 | 3 |
| hsa-miR-20b-5p  | SEMA4B    | 1 | 1 | 1 | 3 |
| hsa-miR-31-5p   | SELE      | 1 | 1 | 1 | 3 |
| hsa-miR-130b-3p | SEL1L3    | 1 | 1 | 1 | 3 |
| hsa-miR-301b-3p | SECISBP2L | 1 | 1 | 1 | 3 |
| hsa-miR-130b-3p | SECISBP2L | 1 | 1 | 1 | 3 |
| hsa-miR-200b-3p | SEC24A    | 1 | 1 | 1 | 3 |
| hsa-miR-429     | SEC24A    | 1 | 1 | 1 | 3 |
| hsa-miR-9-3p    | SEC24A    | 1 | 1 | 1 | 3 |
| hsa-miR-200c-3p | SEC24A    | 1 | 1 | 1 | 3 |
| hsa-miR-9-5p    | SEC23IP   | 1 | 1 | 1 | 3 |
| hsa-miR-200c-3p | SEC23A    | 1 | 1 | 1 | 3 |
| hsa-miR-200b-3p | SEC23A    | 1 | 1 | 1 | 3 |
| hsa-miR-429     | SEC23A    | 1 | 1 | 1 | 3 |
| hsa-miR-888-5p  | SEC22C    | 1 | 1 | 1 | 3 |
| hsa-miR-4664-5p | SEC22C    | 1 | 1 | 1 | 3 |
| hsa-miR-767-3p  | SEC14L4   | 1 | 1 | 1 | 3 |
| hsa-miR-6891-5p | SDK1      | 1 | 1 | 1 | 3 |
| hsa-miR-556-5p  | SDHD      | 1 | 1 | 1 | 3 |
| hsa-miR-7-5p    | SDHC      | 1 | 1 | 1 | 3 |
| hsa-miR-130b-5p | SDHAF2    | 1 | 1 | 1 | 3 |
| hsa-miR-7-5p    | SDE2      | 1 | 1 | 1 | 3 |
| hsa-miR-7974    | SDC4      | 1 | 1 | 1 | 3 |
| hsa-miR-548d-3p | SDC4      | 1 | 1 | 1 | 3 |

|                 |        |   |   |   |   |
|-----------------|--------|---|---|---|---|
| hsa-miR-548f-3p | SCML2  | 1 | 1 | 1 | 3 |
| hsa-miR-877-3p  | SCML2  | 1 | 1 | 1 | 3 |
| hsa-miR-200a-3p | SCD5   | 1 | 1 | 1 | 3 |
| hsa-miR-141-3p  | SCD5   | 1 | 1 | 1 | 3 |
| hsa-miR-6891-5p | SCD    | 1 | 1 | 1 | 3 |
| hsa-miR-1269a   | SCD    | 1 | 1 | 1 | 3 |
| hsa-miR-96-5p   | SCARB1 | 1 | 1 | 1 | 3 |
| hsa-miR-20b-5p  | SCAMP5 | 1 | 1 | 1 | 3 |
| hsa-miR-3619-5p | SCAMP4 | 1 | 1 | 1 | 3 |
| hsa-miR-940     | SCAMP2 | 1 | 1 | 1 | 3 |
| hsa-miR-1301-3p | SCAMP2 | 1 | 1 | 1 | 3 |
| hsa-miR-6854-5p | SCAMP2 | 1 | 1 | 1 | 3 |
| hsa-miR-106a-5p | SCAMP2 | 1 | 1 | 1 | 3 |
| hsa-miR-20b-5p  | SCAMP2 | 1 | 1 | 1 | 3 |
| hsa-miR-526b-5p | SCAMP1 | 1 | 1 | 1 | 3 |
| hsa-miR-449a    | SATB2  | 1 | 1 | 1 | 3 |
| hsa-miR-449b-5p | SATB2  | 1 | 1 | 1 | 3 |
| hsa-miR-556-5p  | SAR1B  | 1 | 1 | 1 | 3 |
| hsa-miR-449b-5p | SAR1A  | 1 | 1 | 1 | 3 |
| hsa-miR-449a    | SAR1A  | 1 | 1 | 1 | 3 |
| hsa-miR-18b-5p  | SAR1A  | 1 | 1 | 1 | 3 |
| hsa-miR-18a-5p  | SAR1A  | 1 | 1 | 1 | 3 |
| hsa-miR-888-5p  | SAMD8  | 1 | 1 | 1 | 3 |
| hsa-miR-130b-3p | SAMD8  | 1 | 1 | 1 | 3 |
| hsa-miR-548j-5p | SAMD8  | 1 | 1 | 1 | 3 |
| hsa-miR-548y    | SAMD8  | 1 | 1 | 1 | 3 |
| hsa-miR-301b-3p | SAMD8  | 1 | 1 | 1 | 3 |
| hsa-miR-211-5p  | SAMD5  | 1 | 1 | 1 | 3 |
| hsa-miR-940     | SAMD4B | 1 | 1 | 1 | 3 |
| hsa-miR-20b-5p  | SAMD12 | 1 | 1 | 1 | 3 |
| hsa-miR-106a-5p | SAMD12 | 1 | 1 | 1 | 3 |
| hsa-miR-20b-5p  | SALL3  | 1 | 1 | 1 | 3 |
| hsa-miR-301b-3p | SALL3  | 1 | 1 | 1 | 3 |
| hsa-miR-130b-3p | SALL3  | 1 | 1 | 1 | 3 |
| hsa-miR-106a-5p | SALL3  | 1 | 1 | 1 | 3 |
| hsa-miR-20b-5p  | SACS   | 1 | 1 | 1 | 3 |
| hsa-miR-363-3p  | S1PR1  | 1 | 1 | 1 | 3 |
| hsa-miR-138-5p  | S100A1 | 1 | 1 | 1 | 3 |
| hsa-miR-7-5p    | RYK    | 1 | 1 | 1 | 3 |
| hsa-miR-130b-3p | RUNX3  | 1 | 1 | 1 | 3 |
| hsa-miR-106a-5p | RUNX3  | 1 | 1 | 1 | 3 |
| hsa-miR-20b-5p  | RUNX3  | 1 | 1 | 1 | 3 |
| hsa-miR-20b-5p  | RUNDC1 | 1 | 1 | 1 | 3 |
| hsa-miR-767-5p  | RUFY2  | 1 | 1 | 1 | 3 |
| hsa-miR-106a-5p | RUFY2  | 1 | 1 | 1 | 3 |
| hsa-miR-20b-5p  | RUFY2  | 1 | 1 | 1 | 3 |
| hsa-miR-205-5p  | RTN3   | 1 | 1 | 1 | 3 |
| hsa-miR-6793-5p | RSRC2  | 1 | 1 | 1 | 3 |
| hsa-miR-548d-3p | RSRC1  | 1 | 1 | 1 | 3 |
| hsa-miR-141-5p  | RSPH4A | 1 | 1 | 1 | 3 |
| hsa-miR-3170    | RSL1D1 | 1 | 1 | 1 | 3 |
| hsa-miR-363-3p  | RSBN1  | 1 | 1 | 1 | 3 |
| hsa-miR-548j-5p | RSBN1  | 1 | 1 | 1 | 3 |
| hsa-miR-548y    | RSBN1  | 1 | 1 | 1 | 3 |
| hsa-miR-363-3p  | RRN3   | 1 | 1 | 1 | 3 |
| hsa-miR-20b-5p  | RRM2   | 1 | 1 | 1 | 3 |
| hsa-miR-106a-5p | RRM2   | 1 | 1 | 1 | 3 |
| hsa-miR-7-5p    | RRAS2  | 1 | 1 | 1 | 3 |

|                  |           |   |   |   |   |
|------------------|-----------|---|---|---|---|
| hsa-miR-3161     | RRAS2     | 1 | 1 | 1 | 3 |
| hsa-miR-130b-3p  | RRAGD     | 1 | 1 | 1 | 3 |
| hsa-miR-106a-5p  | RRAGD     | 1 | 1 | 1 | 3 |
| hsa-miR-20b-5p   | RRAGD     | 1 | 1 | 1 | 3 |
| hsa-miR-301b-3p  | RRAGD     | 1 | 1 | 1 | 3 |
| hsa-miR-3161     | RPS6KB1   | 1 | 1 | 1 | 3 |
| hsa-miR-130b-3p  | RPS6KA5   | 1 | 1 | 1 | 3 |
| hsa-miR-106a-5p  | RPS6KA5   | 1 | 1 | 1 | 3 |
| hsa-miR-20b-5p   | RPS6KA5   | 1 | 1 | 1 | 3 |
| hsa-miR-301b-3p  | RPS6KA5   | 1 | 1 | 1 | 3 |
| hsa-miR-526b-5p  | RPS6KA3   | 1 | 1 | 1 | 3 |
| hsa-miR-636      | RPS6KA3   | 1 | 1 | 1 | 3 |
| hsa-miR-205-3p   | RPP14     | 1 | 1 | 1 | 3 |
| hsa-miR-512-3p   | RPL17-C18 | 1 | 1 | 1 | 3 |
| hsa-miR-7-5p     | RPL15     | 1 | 1 | 1 | 3 |
| hsa-miR-3150b-3p | RPH3A     | 1 | 1 | 1 | 3 |
| hsa-miR-215-5p   | RPAP2     | 1 | 1 | 1 | 3 |
| hsa-miR-20b-5p   | RPA2      | 1 | 1 | 1 | 3 |
| hsa-miR-130b-3p  | RPA2      | 1 | 1 | 1 | 3 |
| hsa-miR-18a-5p   | RORA      | 1 | 1 | 1 | 3 |
| hsa-miR-106a-5p  | RORA      | 1 | 1 | 1 | 3 |
| hsa-miR-3662     | RORA      | 1 | 1 | 1 | 3 |
| hsa-miR-20b-5p   | RORA      | 1 | 1 | 1 | 3 |
| hsa-miR-18b-5p   | RORA      | 1 | 1 | 1 | 3 |
| hsa-miR-200c-3p  | ROCK2     | 1 | 1 | 1 | 3 |
| hsa-miR-200b-3p  | ROCK2     | 1 | 1 | 1 | 3 |
| hsa-miR-138-5p   | ROCK2     | 1 | 1 | 1 | 3 |
| hsa-miR-888-5p   | RNPS1     | 1 | 1 | 1 | 3 |
| hsa-miR-1283     | RNPS1     | 1 | 1 | 1 | 3 |
| hsa-miR-940      | RNF41     | 1 | 1 | 1 | 3 |
| hsa-miR-93-3p    | RNF4      | 1 | 1 | 1 | 3 |
| hsa-miR-363-3p   | RNF4      | 1 | 1 | 1 | 3 |
| hsa-miR-3662     | RNF219    | 1 | 1 | 1 | 3 |
| hsa-miR-3934-3p  | RNF216    | 1 | 1 | 1 | 3 |
| hsa-miR-200b-3p  | RNF2      | 1 | 1 | 1 | 3 |
| hsa-miR-200c-3p  | RNF2      | 1 | 1 | 1 | 3 |
| hsa-miR-548d-3p  | RNF2      | 1 | 1 | 1 | 3 |
| hsa-miR-425-5p   | RNF168    | 1 | 1 | 1 | 3 |
| hsa-miR-3150b-3p | RNF157    | 1 | 1 | 1 | 3 |
| hsa-miR-130b-3p  | RNF145    | 1 | 1 | 1 | 3 |
| hsa-miR-577      | RNF138    | 1 | 1 | 1 | 3 |
| hsa-miR-767-5p   | RNF138    | 1 | 1 | 1 | 3 |
| hsa-miR-7-5p     | RNF114    | 1 | 1 | 1 | 3 |
| hsa-miR-3662     | RNF111    | 1 | 1 | 1 | 3 |
| hsa-miR-200b-3p  | RND3      | 1 | 1 | 1 | 3 |
| hsa-miR-200c-3p  | RND3      | 1 | 1 | 1 | 3 |
| hsa-miR-548d-3p  | RMND5A    | 1 | 1 | 1 | 3 |
| hsa-miR-138-5p   | RMND5A    | 1 | 1 | 1 | 3 |
| hsa-miR-6715a-3p | RLIM      | 1 | 1 | 1 | 3 |
| hsa-miR-3662     | RLIM      | 1 | 1 | 1 | 3 |
| hsa-miR-301b-3p  | RLIM      | 1 | 1 | 1 | 3 |
| hsa-miR-106a-5p  | RLIM      | 1 | 1 | 1 | 3 |
| hsa-miR-20b-5p   | RLIM      | 1 | 1 | 1 | 3 |
| hsa-miR-130b-3p  | RLIM      | 1 | 1 | 1 | 3 |
| hsa-miR-215-5p   | RIC8B     | 1 | 1 | 1 | 3 |
| hsa-miR-138-5p   | RHOC      | 1 | 1 | 1 | 3 |
| hsa-miR-512-3p   | RHOC      | 1 | 1 | 1 | 3 |
| hsa-miR-20b-5p   | RHOC      | 1 | 1 | 1 | 3 |

|                  |         |   |   |   |   |
|------------------|---------|---|---|---|---|
| hsa-miR-106a-5p  | RHOC    | 1 | 1 | 1 | 3 |
| hsa-miR-135a-3p  | RHOBTB3 | 1 | 1 | 1 | 3 |
| hsa-miR-31-5p    | RHOBTB1 | 1 | 1 | 1 | 3 |
| hsa-miR-527      | RHOB    | 1 | 1 | 1 | 3 |
| hsa-miR-518a-5p  | RHOB    | 1 | 1 | 1 | 3 |
| hsa-miR-4446-3p  | RHOA    | 1 | 1 | 1 | 3 |
| hsa-miR-6877-5p  | RHOA    | 1 | 1 | 1 | 3 |
| hsa-miR-3187-3p  | RHOA    | 1 | 1 | 1 | 3 |
| hsa-miR-577      | RHOA    | 1 | 1 | 1 | 3 |
| hsa-miR-200c-3p  | RHOA    | 1 | 1 | 1 | 3 |
| hsa-miR-877-3p   | RGS6    | 1 | 1 | 1 | 3 |
| hsa-miR-130b-5p  | RGS6    | 1 | 1 | 1 | 3 |
| hsa-miR-106a-5p  | RGMB    | 1 | 1 | 1 | 3 |
| hsa-miR-20b-5p   | RGMB    | 1 | 1 | 1 | 3 |
| hsa-miR-130b-3p  | RFX7    | 1 | 1 | 1 | 3 |
| hsa-miR-301b-3p  | RFX7    | 1 | 1 | 1 | 3 |
| hsa-miR-205-5p   | RFX7    | 1 | 1 | 1 | 3 |
| hsa-miR-363-3p   | REV3L   | 1 | 1 | 1 | 3 |
| hsa-miR-96-5p    | REV1    | 1 | 1 | 1 | 3 |
| hsa-miR-106a-5p  | REST    | 1 | 1 | 1 | 3 |
| hsa-miR-20b-5p   | REST    | 1 | 1 | 1 | 3 |
| hsa-miR-105-5p   | REST    | 1 | 1 | 1 | 3 |
| hsa-miR-4758-3p  | RELT    | 1 | 1 | 1 | 3 |
| hsa-miR-138-5p   | RELN    | 1 | 1 | 1 | 3 |
| hsa-miR-7-5p     | RELA    | 1 | 1 | 1 | 3 |
| hsa-miR-3664-5p  | REEP5   | 1 | 1 | 1 | 3 |
| hsa-miR-20b-5p   | REEP3   | 1 | 1 | 1 | 3 |
| hsa-miR-106a-5p  | REEP3   | 1 | 1 | 1 | 3 |
| hsa-miR-182-5p   | RECK    | 1 | 1 | 1 | 3 |
| hsa-miR-940      | RECK    | 1 | 1 | 1 | 3 |
| hsa-miR-183-5p   | RCN2    | 1 | 1 | 1 | 3 |
| hsa-miR-877-5p   | RC3H1   | 1 | 1 | 1 | 3 |
| hsa-miR-548d-3p  | RBPJ    | 1 | 1 | 1 | 3 |
| hsa-miR-877-3p   | RBMS3   | 1 | 1 | 1 | 3 |
| hsa-miR-7-5p     | RBMS3   | 1 | 1 | 1 | 3 |
| hsa-miR-6499-3p  | RBMS2   | 1 | 1 | 1 | 3 |
| hsa-miR-122-5p   | RBM43   | 1 | 1 | 1 | 3 |
| hsa-miR-138-1-3p | RBM41   | 1 | 1 | 1 | 3 |
| hsa-miR-96-3p    | RBM27   | 1 | 1 | 1 | 3 |
| hsa-miR-301b-3p  | RBM20   | 1 | 1 | 1 | 3 |
| hsa-miR-130b-3p  | RBM20   | 1 | 1 | 1 | 3 |
| hsa-miR-20b-5p   | RBM20   | 1 | 1 | 1 | 3 |
| hsa-miR-1266-5p  | RBM12B  | 1 | 1 | 1 | 3 |
| hsa-miR-106a-5p  | RBL2    | 1 | 1 | 1 | 3 |
| hsa-miR-526b-5p  | RBL1    | 1 | 1 | 1 | 3 |
| hsa-miR-122-5p   | RBL1    | 1 | 1 | 1 | 3 |
| hsa-miR-940      | RBL1    | 1 | 1 | 1 | 3 |
| hsa-miR-3662     | RBL1    | 1 | 1 | 1 | 3 |
| hsa-miR-3923     | RBFOX2  | 1 | 1 | 1 | 3 |
| hsa-miR-20b-5p   | RBBP7   | 1 | 1 | 1 | 3 |
| hsa-miR-215-5p   | RB1     | 1 | 1 | 1 | 3 |
| hsa-miR-106a-5p  | RB1     | 1 | 1 | 1 | 3 |
| hsa-miR-20b-5p   | RB1     | 1 | 1 | 1 | 3 |
| hsa-miR-3614-5p  | RB1     | 1 | 1 | 1 | 3 |
| hsa-miR-200c-3p  | RASSF8  | 1 | 1 | 1 | 3 |
| hsa-miR-429      | RASSF8  | 1 | 1 | 1 | 3 |
| hsa-miR-200b-3p  | RASSF8  | 1 | 1 | 1 | 3 |
| hsa-miR-363-5p   | RASL10B | 1 | 1 | 1 | 3 |

|                  |          |   |   |   |   |
|------------------|----------|---|---|---|---|
| hsa-miR-31-5p    | RASA1    | 1 | 1 | 1 | 3 |
| hsa-miR-182-5p   | RARG     | 1 | 1 | 1 | 3 |
| hsa-miR-138-5p   | RARA     | 1 | 1 | 1 | 3 |
| hsa-miR-940      | RARA     | 1 | 1 | 1 | 3 |
| hsa-miR-548f-3p  | RAPH1    | 1 | 1 | 1 | 3 |
| hsa-miR-548d-3p  | RAPH1    | 1 | 1 | 1 | 3 |
| hsa-miR-940      | RAPGEF6  | 1 | 1 | 1 | 3 |
| hsa-miR-629-3p   | RAPGEF6  | 1 | 1 | 1 | 3 |
| hsa-miR-20b-5p   | RAPGEF4  | 1 | 1 | 1 | 3 |
| hsa-miR-3187-3p  | RAP2C    | 1 | 1 | 1 | 3 |
| hsa-miR-130b-3p  | RAP2C    | 1 | 1 | 1 | 3 |
| hsa-miR-106a-5p  | RAP2C    | 1 | 1 | 1 | 3 |
| hsa-miR-20b-5p   | RAP2C    | 1 | 1 | 1 | 3 |
| hsa-miR-6715a-3p | RAP1A    | 1 | 1 | 1 | 3 |
| hsa-miR-636      | RAP1A    | 1 | 1 | 1 | 3 |
| hsa-miR-3662     | RANBP1   | 1 | 1 | 1 | 3 |
| hsa-miR-130b-5p  | RALGPS2  | 1 | 1 | 1 | 3 |
| hsa-miR-183-5p   | RALGDS   | 1 | 1 | 1 | 3 |
| hsa-miR-1283     | RAG1     | 1 | 1 | 1 | 3 |
| hsa-miR-7-5p     | RAF1     | 1 | 1 | 1 | 3 |
| hsa-miR-6781-3p  | RAD54L2  | 1 | 1 | 1 | 3 |
| hsa-miR-4724-5p  | RAD51AP1 | 1 | 1 | 1 | 3 |
| hsa-miR-96-3p    | RAD23B   | 1 | 1 | 1 | 3 |
| hsa-miR-106a-5p  | RAD23B   | 1 | 1 | 1 | 3 |
| hsa-miR-301b-3p  | RACGAP1  | 1 | 1 | 1 | 3 |
| hsa-miR-130b-3p  | RACGAP1  | 1 | 1 | 1 | 3 |
| hsa-miR-20b-5p   | RABEP1   | 1 | 1 | 1 | 3 |
| hsa-miR-200a-3p  | RAB8B    | 1 | 1 | 1 | 3 |
| hsa-miR-518a-5p  | RAB8B    | 1 | 1 | 1 | 3 |
| hsa-miR-548y     | RAB8B    | 1 | 1 | 1 | 3 |
| hsa-miR-527      | RAB8B    | 1 | 1 | 1 | 3 |
| hsa-miR-141-3p   | RAB8B    | 1 | 1 | 1 | 3 |
| hsa-miR-548j-5p  | RAB8B    | 1 | 1 | 1 | 3 |
| hsa-miR-18b-5p   | RAB5C    | 1 | 1 | 1 | 3 |
| hsa-miR-183-3p   | RAB5C    | 1 | 1 | 1 | 3 |
| hsa-miR-18a-5p   | RAB5C    | 1 | 1 | 1 | 3 |
| hsa-miR-483-3p   | RAB5B    | 1 | 1 | 1 | 3 |
| hsa-miR-20b-5p   | RAB5B    | 1 | 1 | 1 | 3 |
| hsa-miR-106a-5p  | RAB5B    | 1 | 1 | 1 | 3 |
| hsa-miR-130b-3p  | RAB5A    | 1 | 1 | 1 | 3 |
| hsa-miR-4763-5p  | RAB37    | 1 | 1 | 1 | 3 |
| hsa-miR-130b-3p  | RAB34    | 1 | 1 | 1 | 3 |
| hsa-miR-9-5p     | RAB34    | 1 | 1 | 1 | 3 |
| hsa-miR-301b-3p  | RAB34    | 1 | 1 | 1 | 3 |
| hsa-miR-548d-3p  | RAB33B   | 1 | 1 | 1 | 3 |
| hsa-miR-425-5p   | RAB31    | 1 | 1 | 1 | 3 |
| hsa-miR-3176     | RAB30    | 1 | 1 | 1 | 3 |
| hsa-miR-518a-5p  | RAB23    | 1 | 1 | 1 | 3 |
| hsa-miR-527      | RAB23    | 1 | 1 | 1 | 3 |
| hsa-miR-211-5p   | RAB22A   | 1 | 1 | 1 | 3 |
| hsa-miR-106a-5p  | RAB22A   | 1 | 1 | 1 | 3 |
| hsa-miR-20b-5p   | RAB22A   | 1 | 1 | 1 | 3 |
| hsa-miR-200b-3p  | RAB21    | 1 | 1 | 1 | 3 |
| hsa-miR-3065-5p  | RAB1A    | 1 | 1 | 1 | 3 |
| hsa-miR-449b-3p  | RAB1A    | 1 | 1 | 1 | 3 |
| hsa-miR-4665-5p  | RAB15    | 1 | 1 | 1 | 3 |
| hsa-miR-301b-3p  | RAB14    | 1 | 1 | 1 | 3 |
| hsa-miR-527      | RAB14    | 1 | 1 | 1 | 3 |



|                  |           |   |   |   |   |
|------------------|-----------|---|---|---|---|
| hsa-miR-518a-5p  | RAB14     | 1 | 1 | 1 | 3 |
| hsa-miR-130b-3p  | RAB14     | 1 | 1 | 1 | 3 |
| hsa-miR-7-5p     | RAB11FIP5 | 1 | 1 | 1 | 3 |
| hsa-miR-4665-5p  | RAB11FIP4 | 1 | 1 | 1 | 3 |
| hsa-miR-20b-5p   | RAB11FIP1 | 1 | 1 | 1 | 3 |
| hsa-miR-205-5p   | RAB11FIP1 | 1 | 1 | 1 | 3 |
| hsa-miR-106a-5p  | RAB11FIP1 | 1 | 1 | 1 | 3 |
| hsa-miR-20b-5p   | RAB10     | 1 | 1 | 1 | 3 |
| hsa-miR-3923     | RAB10     | 1 | 1 | 1 | 3 |
| hsa-miR-106a-5p  | RAB10     | 1 | 1 | 1 | 3 |
| hsa-miR-211-5p   | RAB10     | 1 | 1 | 1 | 3 |
| hsa-miR-522-3p   | QSER1     | 1 | 1 | 1 | 3 |
| hsa-miR-135a-3p  | QSER1     | 1 | 1 | 1 | 3 |
| hsa-miR-20b-5p   | PXK       | 1 | 1 | 1 | 3 |
| hsa-miR-130b-3p  | PXK       | 1 | 1 | 1 | 3 |
| hsa-miR-301b-3p  | PXK       | 1 | 1 | 1 | 3 |
| hsa-miR-106a-5p  | PXK       | 1 | 1 | 1 | 3 |
| hsa-miR-9-5p     | PXDN      | 1 | 1 | 1 | 3 |
| hsa-miR-3200-3p  | PURA      | 1 | 1 | 1 | 3 |
| hsa-miR-106a-3p  | PURA      | 1 | 1 | 1 | 3 |
| hsa-miR-3616-3p  | PUM2      | 1 | 1 | 1 | 3 |
| hsa-miR-200c-3p  | PTPRZ1    | 1 | 1 | 1 | 3 |
| hsa-miR-211-5p   | PTPRT     | 1 | 1 | 1 | 3 |
| hsa-miR-205-5p   | PTPRM     | 1 | 1 | 1 | 3 |
| hsa-miR-1283     | PTPRK     | 1 | 1 | 1 | 3 |
| hsa-miR-205-5p   | PTPRJ     | 1 | 1 | 1 | 3 |
| hsa-miR-592      | PTPRJ     | 1 | 1 | 1 | 3 |
| hsa-miR-301b-3p  | PTPRG     | 1 | 1 | 1 | 3 |
| hsa-miR-130b-3p  | PTPRG     | 1 | 1 | 1 | 3 |
| hsa-miR-200a-3p  | PTPRD     | 1 | 1 | 1 | 3 |
| hsa-miR-141-3p   | PTPRD     | 1 | 1 | 1 | 3 |
| hsa-miR-106a-5p  | PTPN4     | 1 | 1 | 1 | 3 |
| hsa-miR-20b-5p   | PTPN4     | 1 | 1 | 1 | 3 |
| hsa-miR-301b-3p  | PTPN4     | 1 | 1 | 1 | 3 |
| hsa-miR-512-3p   | PTPN4     | 1 | 1 | 1 | 3 |
| hsa-miR-130b-3p  | PTPN4     | 1 | 1 | 1 | 3 |
| hsa-miR-200c-3p  | PTPN13    | 1 | 1 | 1 | 3 |
| hsa-miR-20b-5p   | PTPDC1    | 1 | 1 | 1 | 3 |
| hsa-miR-106a-5p  | PTPDC1    | 1 | 1 | 1 | 3 |
| hsa-miR-3065-5p  | PTP4A2    | 1 | 1 | 1 | 3 |
| hsa-miR-548j-5p  | PTP4A1    | 1 | 1 | 1 | 3 |
| hsa-miR-767-5p   | PTP4A1    | 1 | 1 | 1 | 3 |
| hsa-miR-130b-3p  | PTP4A1    | 1 | 1 | 1 | 3 |
| hsa-miR-548y     | PTP4A1    | 1 | 1 | 1 | 3 |
| hsa-miR-940      | PTK2B     | 1 | 1 | 1 | 3 |
| hsa-miR-7-5p     | PTK2      | 1 | 1 | 1 | 3 |
| hsa-miR-138-5p   | PTK2      | 1 | 1 | 1 | 3 |
| hsa-miR-3170     | PTGR2     | 1 | 1 | 1 | 3 |
| hsa-miR-877-3p   | PTGFRN    | 1 | 1 | 1 | 3 |
| hsa-miR-106a-5p  | PTGFRN    | 1 | 1 | 1 | 3 |
| hsa-miR-20b-5p   | PTGFRN    | 1 | 1 | 1 | 3 |
| hsa-miR-130b-3p  | PTEN      | 1 | 1 | 1 | 3 |
| hsa-miR-6715b-3p | PTBP3     | 1 | 1 | 1 | 3 |
| hsa-miR-363-3p   | PTAR1     | 1 | 1 | 1 | 3 |
| hsa-miR-7-5p     | PSME3     | 1 | 1 | 1 | 3 |
| hsa-miR-940      | PSMD11    | 1 | 1 | 1 | 3 |
| hsa-miR-6720-3p  | PSMB2     | 1 | 1 | 1 | 3 |
| hsa-miR-200c-3p  | PSD3      | 1 | 1 | 1 | 3 |

|                  |         |   |   |   |   |
|------------------|---------|---|---|---|---|
| hsa-miR-1266-5p  | PSD3    | 1 | 1 | 1 | 3 |
| hsa-miR-429      | PSD3    | 1 | 1 | 1 | 3 |
| hsa-miR-130b-3p  | PSAP    | 1 | 1 | 1 | 3 |
| hsa-miR-301b-3p  | PRUNE2  | 1 | 1 | 1 | 3 |
| hsa-miR-527      | PRUNE2  | 1 | 1 | 1 | 3 |
| hsa-miR-130b-3p  | PRUNE2  | 1 | 1 | 1 | 3 |
| hsa-miR-518a-5p  | PRUNE2  | 1 | 1 | 1 | 3 |
| hsa-miR-940      | PRSS45  | 1 | 1 | 1 | 3 |
| hsa-miR-9-5p     | PRRX1   | 1 | 1 | 1 | 3 |
| hsa-miR-429      | PRRG4   | 1 | 1 | 1 | 3 |
| hsa-miR-200b-3p  | PRRG4   | 1 | 1 | 1 | 3 |
| hsa-miR-200c-3p  | PRRG4   | 1 | 1 | 1 | 3 |
| hsa-miR-3150b-3p | PRRC2B  | 1 | 1 | 1 | 3 |
| hsa-miR-548j-5p  | PRRC1   | 1 | 1 | 1 | 3 |
| hsa-miR-548y     | PRRC1   | 1 | 1 | 1 | 3 |
| hsa-miR-183-5p   | PRRC1   | 1 | 1 | 1 | 3 |
| hsa-miR-20b-5p   | PRR14L  | 1 | 1 | 1 | 3 |
| hsa-miR-6781-3p  | PRR11   | 1 | 1 | 1 | 3 |
| hsa-miR-93-3p    | PRPF8   | 1 | 1 | 1 | 3 |
| hsa-miR-940      | PRPF4B  | 1 | 1 | 1 | 3 |
| hsa-miR-105-5p   | PRPF40A | 1 | 1 | 1 | 3 |
| hsa-miR-96-5p    | PROK2   | 1 | 1 | 1 | 3 |
| hsa-miR-211-5p   | PRLR    | 1 | 1 | 1 | 3 |
| hsa-miR-105-5p   | PRKX    | 1 | 1 | 1 | 3 |
| hsa-miR-122-5p   | PRKRA   | 1 | 1 | 1 | 3 |
| hsa-miR-215-5p   | PRKD3   | 1 | 1 | 1 | 3 |
| hsa-miR-31-5p    | PRKCE   | 1 | 1 | 1 | 3 |
| hsa-miR-205-5p   | PRKCE   | 1 | 1 | 1 | 3 |
| hsa-miR-96-5p    | PRKCE   | 1 | 1 | 1 | 3 |
| hsa-miR-96-5p    | PRKAR1A | 1 | 1 | 1 | 3 |
| hsa-miR-636      | PRKACB  | 1 | 1 | 1 | 3 |
| hsa-miR-182-5p   | PRKAA2  | 1 | 1 | 1 | 3 |
| hsa-miR-301b-3p  | PRKAA1  | 1 | 1 | 1 | 3 |
| hsa-miR-130b-3p  | PRKAA1  | 1 | 1 | 1 | 3 |
| hsa-miR-141-3p   | PRELID2 | 1 | 1 | 1 | 3 |
| hsa-miR-200a-3p  | PRELID2 | 1 | 1 | 1 | 3 |
| hsa-miR-4446-3p  | PRELID1 | 1 | 1 | 1 | 3 |
| hsa-miR-7-5p     | PRDM6   | 1 | 1 | 1 | 3 |
| hsa-miR-211-5p   | PRDM2   | 1 | 1 | 1 | 3 |
| hsa-miR-6854-5p  | PRDM2   | 1 | 1 | 1 | 3 |
| hsa-miR-96-5p    | PRDM16  | 1 | 1 | 1 | 3 |
| hsa-miR-9-5p     | PRDM1   | 1 | 1 | 1 | 3 |
| hsa-miR-301b-3p  | PPP6R3  | 1 | 1 | 1 | 3 |
| hsa-miR-130b-3p  | PPP6R3  | 1 | 1 | 1 | 3 |
| hsa-miR-20b-5p   | PPP6R3  | 1 | 1 | 1 | 3 |
| hsa-miR-106a-5p  | PPP6R3  | 1 | 1 | 1 | 3 |
| hsa-miR-130b-3p  | PPP6R2  | 1 | 1 | 1 | 3 |
| hsa-miR-301b-3p  | PPP6R1  | 1 | 1 | 1 | 3 |
| hsa-miR-130b-3p  | PPP6R1  | 1 | 1 | 1 | 3 |
| hsa-miR-20b-5p   | PPP6C   | 1 | 1 | 1 | 3 |
| hsa-miR-3127-3p  | PPP3R1  | 1 | 1 | 1 | 3 |
| hsa-miR-548d-3p  | PPP3R1  | 1 | 1 | 1 | 3 |
| hsa-miR-20b-5p   | PPP3R1  | 1 | 1 | 1 | 3 |
| hsa-miR-211-5p   | PPP3R1  | 1 | 1 | 1 | 3 |
| hsa-miR-3664-3p  | PPP2R5E | 1 | 1 | 1 | 3 |
| hsa-miR-31-5p    | PPP2R2A | 1 | 1 | 1 | 3 |
| hsa-miR-183-5p   | PPP2CB  | 1 | 1 | 1 | 3 |
| hsa-miR-216b-5p  | PPP2CB  | 1 | 1 | 1 | 3 |

|                  |          |   |   |   |   |
|------------------|----------|---|---|---|---|
| hsa-miR-96-5p    | PPP1R9B  | 1 | 1 | 1 | 3 |
| hsa-miR-20b-5p   | PPP1R3B  | 1 | 1 | 1 | 3 |
| hsa-miR-3150b-3p | PPP1R3B  | 1 | 1 | 1 | 3 |
| hsa-miR-363-3p   | PPP1R37  | 1 | 1 | 1 | 3 |
| hsa-miR-7974     | PPP1R26  | 1 | 1 | 1 | 3 |
| hsa-miR-767-3p   | PPP1R1C  | 1 | 1 | 1 | 3 |
| hsa-miR-6891-5p  | PPP1R1C  | 1 | 1 | 1 | 3 |
| hsa-miR-20b-5p   | PPP1R15B | 1 | 1 | 1 | 3 |
| hsa-miR-200a-3p  | PPP1R15B | 1 | 1 | 1 | 3 |
| hsa-miR-141-3p   | PPP1R15B | 1 | 1 | 1 | 3 |
| hsa-miR-940      | PPP1R15B | 1 | 1 | 1 | 3 |
| hsa-miR-130b-3p  | PPP1R15B | 1 | 1 | 1 | 3 |
| hsa-miR-301b-3p  | PPP1R15B | 1 | 1 | 1 | 3 |
| hsa-miR-106a-5p  | PPP1R15B | 1 | 1 | 1 | 3 |
| hsa-miR-3616-3p  | PPP1R12A | 1 | 1 | 1 | 3 |
| hsa-miR-3662     | PPP1R12A | 1 | 1 | 1 | 3 |
| hsa-miR-1304-3p  | PPM1K    | 1 | 1 | 1 | 3 |
| hsa-miR-7-5p     | PPIF     | 1 | 1 | 1 | 3 |
| hsa-miR-130b-3p  | PPARG    | 1 | 1 | 1 | 3 |
| hsa-miR-211-5p   | POU3F2   | 1 | 1 | 1 | 3 |
| hsa-miR-210-3p   | POU2AF1  | 1 | 1 | 1 | 3 |
| hsa-miR-20b-5p   | POLR3G   | 1 | 1 | 1 | 3 |
| hsa-miR-20b-5p   | POLQ     | 1 | 1 | 1 | 3 |
| hsa-miR-7-5p     | POLE4    | 1 | 1 | 1 | 3 |
| hsa-miR-449b-5p  | PODXL    | 1 | 1 | 1 | 3 |
| hsa-miR-449a     | PODXL    | 1 | 1 | 1 | 3 |
| hsa-miR-3619-5p  | PNPLA6   | 1 | 1 | 1 | 3 |
| hsa-miR-3662     | PNN      | 1 | 1 | 1 | 3 |
| hsa-miR-425-5p   | PNMAL1   | 1 | 1 | 1 | 3 |
| hsa-miR-3662     | PNISR    | 1 | 1 | 1 | 3 |
| hsa-miR-3651     | PMAIP1   | 1 | 1 | 1 | 3 |
| hsa-miR-200b-3p  | PMAIP1   | 1 | 1 | 1 | 3 |
| hsa-miR-200c-3p  | PMAIP1   | 1 | 1 | 1 | 3 |
| hsa-miR-429      | PMAIP1   | 1 | 1 | 1 | 3 |
| hsa-miR-888-5p   | PMAIP1   | 1 | 1 | 1 | 3 |
| hsa-miR-105-5p   | PLXNC1   | 1 | 1 | 1 | 3 |
| hsa-miR-93-3p    | PLXNA4   | 1 | 1 | 1 | 3 |
| hsa-miR-20b-5p   | PLXNA1   | 1 | 1 | 1 | 3 |
| hsa-miR-599      | PLXDC2   | 1 | 1 | 1 | 3 |
| hsa-miR-20b-5p   | PLS1     | 1 | 1 | 1 | 3 |
| hsa-miR-106a-5p  | PLS1     | 1 | 1 | 1 | 3 |
| hsa-miR-130b-5p  | PLP1     | 1 | 1 | 1 | 3 |
| hsa-miR-3187-3p  | PLK2     | 1 | 1 | 1 | 3 |
| hsa-miR-6777-5p  | PLIN1    | 1 | 1 | 1 | 3 |
| hsa-miR-20b-5p   | PLEKHO2  | 1 | 1 | 1 | 3 |
| hsa-miR-31-3p    | PLEKHB2  | 1 | 1 | 1 | 3 |
| hsa-miR-182-5p   | PLEKHA8  | 1 | 1 | 1 | 3 |
| hsa-miR-363-3p   | PLEKHA1  | 1 | 1 | 1 | 3 |
| hsa-miR-7-5p     | PLEC     | 1 | 1 | 1 | 3 |
| hsa-miR-940      | PLCXD1   | 1 | 1 | 1 | 3 |
| hsa-miR-6844     | PLCL1    | 1 | 1 | 1 | 3 |
| hsa-miR-548y     | PLAGL2   | 1 | 1 | 1 | 3 |
| hsa-miR-892a     | PLAGL2   | 1 | 1 | 1 | 3 |
| hsa-miR-548j-5p  | PLAGL2   | 1 | 1 | 1 | 3 |
| hsa-miR-1269a    | PLAGL2   | 1 | 1 | 1 | 3 |
| hsa-miR-767-5p   | PLAG1    | 1 | 1 | 1 | 3 |
| hsa-miR-6891-5p  | PLA2G2F  | 1 | 1 | 1 | 3 |
| hsa-miR-215-5p   | PKP4     | 1 | 1 | 1 | 3 |

|                 |         |   |   |   |   |
|-----------------|---------|---|---|---|---|
| hsa-miR-4665-5p | PKNOX2  | 1 | 1 | 1 | 3 |
| hsa-miR-940     | PKNOX1  | 1 | 1 | 1 | 3 |
| hsa-miR-20b-5p  | PKNOX1  | 1 | 1 | 1 | 3 |
| hsa-miR-106a-5p | PKNOX1  | 1 | 1 | 1 | 3 |
| hsa-miR-3616-5p | PKN2    | 1 | 1 | 1 | 3 |
| hsa-miR-4665-5p | PKM     | 1 | 1 | 1 | 3 |
| hsa-miR-122-5p  | PKM     | 1 | 1 | 1 | 3 |
| hsa-miR-200c-3p | PKD1    | 1 | 1 | 1 | 3 |
| hsa-miR-431-5p  | PITPNA  | 1 | 1 | 1 | 3 |
| hsa-miR-106a-5p | PITPNA  | 1 | 1 | 1 | 3 |
| hsa-miR-20b-5p  | PITPNA  | 1 | 1 | 1 | 3 |
| hsa-miR-20b-5p  | PIP4K2C | 1 | 1 | 1 | 3 |
| hsa-miR-877-3p  | PIP4K2B | 1 | 1 | 1 | 3 |
| hsa-miR-122-5p  | PIP4K2A | 1 | 1 | 1 | 3 |
| hsa-miR-20b-5p  | PIP4K2A | 1 | 1 | 1 | 3 |
| hsa-miR-200c-3p | PIN1    | 1 | 1 | 1 | 3 |
| hsa-miR-200b-3p | PIN1    | 1 | 1 | 1 | 3 |
| hsa-miR-940     | PIM2    | 1 | 1 | 1 | 3 |
| hsa-miR-3619-5p | PIM1    | 1 | 1 | 1 | 3 |
| hsa-miR-7-5p    | PIK3CD  | 1 | 1 | 1 | 3 |
| hsa-miR-940     | PIGR    | 1 | 1 | 1 | 3 |
| hsa-miR-9-5p    | PIGM    | 1 | 1 | 1 | 3 |
| hsa-miR-1304-3p | PIGG    | 1 | 1 | 1 | 3 |
| hsa-miR-4746-5p | PIGA    | 1 | 1 | 1 | 3 |
| hsa-miR-301b-3p | PIGA    | 1 | 1 | 1 | 3 |
| hsa-miR-130b-3p | PIGA    | 1 | 1 | 1 | 3 |
| hsa-miR-9-5p    | PI4K2A  | 1 | 1 | 1 | 3 |
| hsa-miR-3616-3p | PHYHIP  | 1 | 1 | 1 | 3 |
| hsa-miR-20b-5p  | PHTF2   | 1 | 1 | 1 | 3 |
| hsa-miR-106a-5p | PHTF2   | 1 | 1 | 1 | 3 |
| hsa-miR-363-3p  | PHLPP2  | 1 | 1 | 1 | 3 |
| hsa-miR-141-3p  | PHLPP2  | 1 | 1 | 1 | 3 |
| hsa-miR-141-3p  | PHLPP1  | 1 | 1 | 1 | 3 |
| hsa-miR-518a-5p | PHLDA3  | 1 | 1 | 1 | 3 |
| hsa-miR-4665-5p | PHLDA3  | 1 | 1 | 1 | 3 |
| hsa-miR-527     | PHLDA3  | 1 | 1 | 1 | 3 |
| hsa-miR-3616-5p | PHIP    | 1 | 1 | 1 | 3 |
| hsa-miR-6499-3p | PHGDH   | 1 | 1 | 1 | 3 |
| hsa-miR-20b-5p  | PHF6    | 1 | 1 | 1 | 3 |
| hsa-miR-130b-3p | PHF3    | 1 | 1 | 1 | 3 |
| hsa-miR-1301-3p | PHF19   | 1 | 1 | 1 | 3 |
| hsa-miR-548d-3p | PHF19   | 1 | 1 | 1 | 3 |
| hsa-miR-122-5p  | PHF14   | 1 | 1 | 1 | 3 |
| hsa-miR-3176    | PHF13   | 1 | 1 | 1 | 3 |
| hsa-miR-211-5p  | PHF13   | 1 | 1 | 1 | 3 |
| hsa-miR-548f-3p | PHF12   | 1 | 1 | 1 | 3 |
| hsa-miR-301b-3p | PHF12   | 1 | 1 | 1 | 3 |
| hsa-miR-130b-3p | PHF12   | 1 | 1 | 1 | 3 |
| hsa-miR-205-5p  | PHC2    | 1 | 1 | 1 | 3 |
| hsa-miR-522-3p  | PHAX    | 1 | 1 | 1 | 3 |
| hsa-miR-577     | PGRMC1  | 1 | 1 | 1 | 3 |
| hsa-miR-20b-5p  | PGM2L1  | 1 | 1 | 1 | 3 |
| hsa-miR-3614-5p | PGGT1B  | 1 | 1 | 1 | 3 |
| hsa-miR-4664-5p | PFN1    | 1 | 1 | 1 | 3 |
| hsa-miR-20b-5p  | PFKP    | 1 | 1 | 1 | 3 |
| hsa-miR-512-3p  | PFKP    | 1 | 1 | 1 | 3 |
| hsa-miR-106a-5p | PFKP    | 1 | 1 | 1 | 3 |
| hsa-miR-940     | PFAS    | 1 | 1 | 1 | 3 |

|                  |        |   |   |   |   |
|------------------|--------|---|---|---|---|
| hsa-miR-940      | PEX26  | 1 | 1 | 1 | 3 |
| hsa-miR-629-3p   | PERP   | 1 | 1 | 1 | 3 |
| hsa-miR-363-3p   | PER2   | 1 | 1 | 1 | 3 |
| hsa-miR-3187-3p  | PER2   | 1 | 1 | 1 | 3 |
| hsa-miR-6715a-3p | PER2   | 1 | 1 | 1 | 3 |
| hsa-miR-767-5p   | PEG10  | 1 | 1 | 1 | 3 |
| hsa-miR-548y     | PEG10  | 1 | 1 | 1 | 3 |
| hsa-miR-548j-5p  | PEG10  | 1 | 1 | 1 | 3 |
| hsa-miR-363-3p   | PDPN   | 1 | 1 | 1 | 3 |
| hsa-miR-940      | PDPN   | 1 | 1 | 1 | 3 |
| hsa-miR-6844     | PDPK1  | 1 | 1 | 1 | 3 |
| hsa-miR-429      | PDPK1  | 1 | 1 | 1 | 3 |
| hsa-miR-200c-3p  | PDPK1  | 1 | 1 | 1 | 3 |
| hsa-miR-200b-3p  | PDPK1  | 1 | 1 | 1 | 3 |
| hsa-miR-3065-5p  | PDP2   | 1 | 1 | 1 | 3 |
| hsa-miR-205-3p   | PDLIM5 | 1 | 1 | 1 | 3 |
| hsa-miR-93-3p    | PDIK1L | 1 | 1 | 1 | 3 |
| hsa-miR-3662     | PDIK1L | 1 | 1 | 1 | 3 |
| hsa-miR-1226-3p  | PDIK1L | 1 | 1 | 1 | 3 |
| hsa-miR-130b-3p  | PDGFRA | 1 | 1 | 1 | 3 |
| hsa-miR-6715b-3p | PDE7B  | 1 | 1 | 1 | 3 |
| hsa-miR-940      | PDE7B  | 1 | 1 | 1 | 3 |
| hsa-miR-6715a-3p | PDE7B  | 1 | 1 | 1 | 3 |
| hsa-miR-210-5p   | PDE7A  | 1 | 1 | 1 | 3 |
| hsa-miR-18b-5p   | PDE4D  | 1 | 1 | 1 | 3 |
| hsa-miR-7-5p     | PDE4D  | 1 | 1 | 1 | 3 |
| hsa-miR-548d-3p  | PDE4D  | 1 | 1 | 1 | 3 |
| hsa-miR-18a-5p   | PDE4D  | 1 | 1 | 1 | 3 |
| hsa-miR-130b-3p  | PDE3B  | 1 | 1 | 1 | 3 |
| hsa-miR-130b-5p  | PDE3A  | 1 | 1 | 1 | 3 |
| hsa-miR-183-5p   | PDCD6  | 1 | 1 | 1 | 3 |
| hsa-miR-183-5p   | PDCD4  | 1 | 1 | 1 | 3 |
| hsa-miR-3187-3p  | PCSK6  | 1 | 1 | 1 | 3 |
| hsa-miR-9-3p     | PCMTD1 | 1 | 1 | 1 | 3 |
| hsa-miR-548j-5p  | PCMTD1 | 1 | 1 | 1 | 3 |
| hsa-miR-363-3p   | PCMTD1 | 1 | 1 | 1 | 3 |
| hsa-miR-548y     | PCMTD1 | 1 | 1 | 1 | 3 |
| hsa-miR-1283     | PCMTD1 | 1 | 1 | 1 | 3 |
| hsa-miR-3065-5p  | PCMTD1 | 1 | 1 | 1 | 3 |
| hsa-miR-940      | PCCB   | 1 | 1 | 1 | 3 |
| hsa-miR-3691-5p  | PCBP2  | 1 | 1 | 1 | 3 |
| hsa-miR-4724-5p  | PCBP1  | 1 | 1 | 1 | 3 |
| hsa-miR-363-3p   | PAX9   | 1 | 1 | 1 | 3 |
| hsa-miR-7-5p     | PAX6   | 1 | 1 | 1 | 3 |
| hsa-miR-577      | PARP1  | 1 | 1 | 1 | 3 |
| hsa-miR-7-5p     | PARP1  | 1 | 1 | 1 | 3 |
| hsa-miR-31-5p    | PARP1  | 1 | 1 | 1 | 3 |
| hsa-miR-18b-5p   | PARD6B | 1 | 1 | 1 | 3 |
| hsa-miR-200b-3p  | PARD6B | 1 | 1 | 1 | 3 |
| hsa-miR-429      | PARD6B | 1 | 1 | 1 | 3 |
| hsa-miR-18a-5p   | PARD6B | 1 | 1 | 1 | 3 |
| hsa-miR-200c-3p  | PARD6B | 1 | 1 | 1 | 3 |
| hsa-miR-20b-5p   | PARD6B | 1 | 1 | 1 | 3 |
| hsa-miR-940      | PAPD7  | 1 | 1 | 1 | 3 |
| hsa-miR-363-3p   | PAPD7  | 1 | 1 | 1 | 3 |
| hsa-miR-1266-5p  | PAPD7  | 1 | 1 | 1 | 3 |
| hsa-miR-301b-3p  | PAPD4  | 1 | 1 | 1 | 3 |
| hsa-miR-20b-5p   | PANK3  | 1 | 1 | 1 | 3 |

|                 |          |   |   |   |   |
|-----------------|----------|---|---|---|---|
| hsa-miR-3074-5p | PAG1     | 1 | 1 | 1 | 3 |
| hsa-miR-548y    | PAFAH1B2 | 1 | 1 | 1 | 3 |
| hsa-miR-518a-5p | PAFAH1B2 | 1 | 1 | 1 | 3 |
| hsa-miR-527     | PAFAH1B2 | 1 | 1 | 1 | 3 |
| hsa-miR-7705    | PAFAH1B2 | 1 | 1 | 1 | 3 |
| hsa-miR-3662    | PAFAH1B2 | 1 | 1 | 1 | 3 |
| hsa-miR-548j-5p | PAFAH1B2 | 1 | 1 | 1 | 3 |
| hsa-miR-20b-5p  | PAFAH1B1 | 1 | 1 | 1 | 3 |
| hsa-miR-4665-5p | PADI1    | 1 | 1 | 1 | 3 |
| hsa-miR-940     | PACS2    | 1 | 1 | 1 | 3 |
| hsa-miR-215-5p  | PABPC4   | 1 | 1 | 1 | 3 |
| hsa-miR-9-5p    | P4HA2    | 1 | 1 | 1 | 3 |
| hsa-miR-122-5p  | P4HA1    | 1 | 1 | 1 | 3 |
| hsa-miR-200b-3p | OXR1     | 1 | 1 | 1 | 3 |
| hsa-miR-20b-5p  | OXR1     | 1 | 1 | 1 | 3 |
| hsa-miR-3662    | OTUD4    | 1 | 1 | 1 | 3 |
| hsa-miR-130b-3p | OTUD4    | 1 | 1 | 1 | 3 |
| hsa-miR-767-5p  | OTUD4    | 1 | 1 | 1 | 3 |
| hsa-miR-130b-3p | OTUD3    | 1 | 1 | 1 | 3 |
| hsa-miR-20b-5p  | OSTM1    | 1 | 1 | 1 | 3 |
| hsa-miR-106a-5p | OSTM1    | 1 | 1 | 1 | 3 |
| hsa-miR-636     | OSBPL8   | 1 | 1 | 1 | 3 |
| hsa-miR-6499-3p | OSBPL3   | 1 | 1 | 1 | 3 |
| hsa-miR-7-5p    | OSBPL11  | 1 | 1 | 1 | 3 |
| hsa-miR-20b-5p  | ORMDL3   | 1 | 1 | 1 | 3 |
| hsa-miR-4446-3p | ORC5     | 1 | 1 | 1 | 3 |
| hsa-miR-940     | ORC4     | 1 | 1 | 1 | 3 |
| hsa-miR-122-5p  | ORC2     | 1 | 1 | 1 | 3 |
| hsa-miR-5001-3p | ORAI2    | 1 | 1 | 1 | 3 |
| hsa-miR-9-5p    | OPTN     | 1 | 1 | 1 | 3 |
| hsa-miR-1269a   | OPHN1    | 1 | 1 | 1 | 3 |
| hsa-miR-9-5p    | ONECUT2  | 1 | 1 | 1 | 3 |
| hsa-miR-106a-3p | OMD      | 1 | 1 | 1 | 3 |
| hsa-miR-141-3p  | OGT      | 1 | 1 | 1 | 3 |
| hsa-miR-200a-3p | OGT      | 1 | 1 | 1 | 3 |
| hsa-miR-3616-3p | OGT      | 1 | 1 | 1 | 3 |
| hsa-miR-106a-3p | ODF4     | 1 | 1 | 1 | 3 |
| hsa-miR-425-5p  | OCRL     | 1 | 1 | 1 | 3 |
| hsa-miR-20b-5p  | OCRL     | 1 | 1 | 1 | 3 |
| hsa-miR-522-3p  | NYAP2    | 1 | 1 | 1 | 3 |
| hsa-miR-7-5p    | NXT2     | 1 | 1 | 1 | 3 |
| hsa-miR-130b-3p | NUS1     | 1 | 1 | 1 | 3 |
| hsa-miR-301b-3p | NUS1     | 1 | 1 | 1 | 3 |
| hsa-miR-527     | NUS1     | 1 | 1 | 1 | 3 |
| hsa-miR-518a-5p | NUS1     | 1 | 1 | 1 | 3 |
| hsa-miR-18a-3p  | NUP98    | 1 | 1 | 1 | 3 |
| hsa-miR-3187-3p | NUP98    | 1 | 1 | 1 | 3 |
| hsa-miR-205-3p  | NUP54    | 1 | 1 | 1 | 3 |
| hsa-miR-141-5p  | NUP50    | 1 | 1 | 1 | 3 |
| hsa-miR-363-3p  | NUP43    | 1 | 1 | 1 | 3 |
| hsa-miR-20b-5p  | NUP35    | 1 | 1 | 1 | 3 |
| hsa-miR-146a-5p | NUMB     | 1 | 1 | 1 | 3 |
| hsa-miR-31-5p   | NUMB     | 1 | 1 | 1 | 3 |
| hsa-miR-363-3p  | NUFIP2   | 1 | 1 | 1 | 3 |
| hsa-miR-3619-5p | NUFIP2   | 1 | 1 | 1 | 3 |
| hsa-miR-429     | NUFIP2   | 1 | 1 | 1 | 3 |
| hsa-miR-200c-3p | NUFIP2   | 1 | 1 | 1 | 3 |
| hsa-miR-135b-5p | NUFIP2   | 1 | 1 | 1 | 3 |

|                  |        |   |   |   |   |
|------------------|--------|---|---|---|---|
| hsa-miR-7974     | NUFIP2 | 1 | 1 | 1 | 3 |
| hsa-miR-3065-5p  | NUFIP2 | 1 | 1 | 1 | 3 |
| hsa-miR-182-5p   | NUFIP2 | 1 | 1 | 1 | 3 |
| hsa-miR-183-5p   | NUFIP2 | 1 | 1 | 1 | 3 |
| hsa-miR-200b-3p  | NUFIP2 | 1 | 1 | 1 | 3 |
| hsa-miR-6891-5p  | NUFIP2 | 1 | 1 | 1 | 3 |
| hsa-miR-636      | NUFIP2 | 1 | 1 | 1 | 3 |
| hsa-miR-3662     | NUDT12 | 1 | 1 | 1 | 3 |
| hsa-miR-556-3p   | NUAK1  | 1 | 1 | 1 | 3 |
| hsa-miR-211-5p   | NUAK1  | 1 | 1 | 1 | 3 |
| hsa-miR-200c-3p  | NTRK2  | 1 | 1 | 1 | 3 |
| hsa-miR-200c-3p  | NTF3   | 1 | 1 | 1 | 3 |
| hsa-miR-122-5p   | NT5C3A | 1 | 1 | 1 | 3 |
| hsa-miR-3691-5p  | NRXN1  | 1 | 1 | 1 | 3 |
| hsa-miR-20b-5p   | NRIP3  | 1 | 1 | 1 | 3 |
| hsa-miR-106a-5p  | NRIP3  | 1 | 1 | 1 | 3 |
| hsa-miR-1229-3p  | NRIP1  | 1 | 1 | 1 | 3 |
| hsa-miR-7-5p     | NREP   | 1 | 1 | 1 | 3 |
| hsa-miR-20b-5p   | NRBP1  | 1 | 1 | 1 | 3 |
| hsa-miR-200b-3p  | NRBP1  | 1 | 1 | 1 | 3 |
| hsa-miR-106a-5p  | NRBP1  | 1 | 1 | 1 | 3 |
| hsa-miR-200c-3p  | NRBP1  | 1 | 1 | 1 | 3 |
| hsa-miR-429      | NRBP1  | 1 | 1 | 1 | 3 |
| hsa-miR-526b-5p  | NRBF2  | 1 | 1 | 1 | 3 |
| hsa-miR-301b-3p  | NRBF2  | 1 | 1 | 1 | 3 |
| hsa-miR-130b-3p  | NRBF2  | 1 | 1 | 1 | 3 |
| hsa-miR-425-5p   | NRAS   | 1 | 1 | 1 | 3 |
| hsa-miR-3664-5p  | NR6A1  | 1 | 1 | 1 | 3 |
| hsa-miR-18a-5p   | NR3C1  | 1 | 1 | 1 | 3 |
| hsa-miR-182-5p   | NR3C1  | 1 | 1 | 1 | 3 |
| hsa-miR-183-5p   | NR3C1  | 1 | 1 | 1 | 3 |
| hsa-miR-548d-3p  | NR2F2  | 1 | 1 | 1 | 3 |
| hsa-miR-3161     | NR2C2  | 1 | 1 | 1 | 3 |
| hsa-miR-106a-5p  | NR2C2  | 1 | 1 | 1 | 3 |
| hsa-miR-20b-5p   | NR2C2  | 1 | 1 | 1 | 3 |
| hsa-miR-556-3p   | NR2C2  | 1 | 1 | 1 | 3 |
| hsa-miR-7-5p     | NR1H2  | 1 | 1 | 1 | 3 |
| hsa-miR-9-3p     | NQO2   | 1 | 1 | 1 | 3 |
| hsa-miR-1301-3p  | NPTXR  | 1 | 1 | 1 | 3 |
| hsa-miR-3150b-3p | NPTXR  | 1 | 1 | 1 | 3 |
| hsa-miR-211-5p   | NPTX1  | 1 | 1 | 1 | 3 |
| hsa-miR-182-5p   | NPTX1  | 1 | 1 | 1 | 3 |
| hsa-miR-205-3p   | NPTN   | 1 | 1 | 1 | 3 |
| hsa-miR-3662     | NPTN   | 1 | 1 | 1 | 3 |
| hsa-miR-449b-3p  | NPPC   | 1 | 1 | 1 | 3 |
| hsa-miR-122-5p   | NPEPPS | 1 | 1 | 1 | 3 |
| hsa-miR-20b-5p   | NPAT   | 1 | 1 | 1 | 3 |
| hsa-miR-106a-5p  | NPAT   | 1 | 1 | 1 | 3 |
| hsa-miR-18a-3p   | NOTCH4 | 1 | 1 | 1 | 3 |
| hsa-miR-1248     | NOTCH2 | 1 | 1 | 1 | 3 |
| hsa-miR-205-5p   | NOTCH2 | 1 | 1 | 1 | 3 |
| hsa-miR-130b-5p  | NOTCH2 | 1 | 1 | 1 | 3 |
| hsa-miR-200c-3p  | NOTCH1 | 1 | 1 | 1 | 3 |
| hsa-miR-449a     | NOTCH1 | 1 | 1 | 1 | 3 |
| hsa-miR-200b-3p  | NOTCH1 | 1 | 1 | 1 | 3 |
| hsa-miR-1248     | NONO   | 1 | 1 | 1 | 3 |
| hsa-miR-1304-3p  | NOM1   | 1 | 1 | 1 | 3 |
| hsa-miR-31-5p    | NOL9   | 1 | 1 | 1 | 3 |

|                  |         |   |   |   |   |
|------------------|---------|---|---|---|---|
| hsa-miR-1276     | NOL11   | 1 | 1 | 1 | 3 |
| hsa-miR-200c-3p  | NOG     | 1 | 1 | 1 | 3 |
| hsa-miR-215-5p   | NOD2    | 1 | 1 | 1 | 3 |
| hsa-miR-130b-5p  | NLGN4X  | 1 | 1 | 1 | 3 |
| hsa-miR-4745-3p  | NKX2-5  | 1 | 1 | 1 | 3 |
| hsa-miR-106a-5p  | NKIRAS1 | 1 | 1 | 1 | 3 |
| hsa-miR-20b-5p   | NKIRAS1 | 1 | 1 | 1 | 3 |
| hsa-miR-301b-3p  | NIPA1   | 1 | 1 | 1 | 3 |
| hsa-miR-130b-3p  | NIPA1   | 1 | 1 | 1 | 3 |
| hsa-miR-205-3p   | NIN     | 1 | 1 | 1 | 3 |
| hsa-miR-20b-5p   | NIN     | 1 | 1 | 1 | 3 |
| hsa-miR-106a-5p  | NIN     | 1 | 1 | 1 | 3 |
| hsa-miR-9-5p     | NIN     | 1 | 1 | 1 | 3 |
| hsa-miR-548f-3p  | NHSL1   | 1 | 1 | 1 | 3 |
| hsa-miR-96-5p    | NHLRC3  | 1 | 1 | 1 | 3 |
| hsa-miR-20b-5p   | NHLRC3  | 1 | 1 | 1 | 3 |
| hsa-miR-940      | NHLRC2  | 1 | 1 | 1 | 3 |
| hsa-miR-122-5p   | NFX1    | 1 | 1 | 1 | 3 |
| hsa-miR-9-5p     | NFKB1   | 1 | 1 | 1 | 3 |
| hsa-miR-6777-5p  | NFIC    | 1 | 1 | 1 | 3 |
| hsa-miR-3150b-3p | NFIC    | 1 | 1 | 1 | 3 |
| hsa-miR-363-5p   | NFIC    | 1 | 1 | 1 | 3 |
| hsa-miR-130b-3p  | NFIB    | 1 | 1 | 1 | 3 |
| hsa-miR-512-3p   | NFIB    | 1 | 1 | 1 | 3 |
| hsa-miR-9-5p     | NFATC3  | 1 | 1 | 1 | 3 |
| hsa-miR-106a-5p  | NFAT5   | 1 | 1 | 1 | 3 |
| hsa-miR-20b-5p   | NFAT5   | 1 | 1 | 1 | 3 |
| hsa-miR-205-5p   | NFAT5   | 1 | 1 | 1 | 3 |
| hsa-miR-4446-3p  | NFASC   | 1 | 1 | 1 | 3 |
| hsa-miR-940      | NF2     | 1 | 1 | 1 | 3 |
| hsa-miR-31-5p    | NF2     | 1 | 1 | 1 | 3 |
| hsa-miR-20b-5p   | NETO2   | 1 | 1 | 1 | 3 |
| hsa-miR-3662     | NETO2   | 1 | 1 | 1 | 3 |
| hsa-miR-522-3p   | NETO2   | 1 | 1 | 1 | 3 |
| hsa-miR-106a-5p  | NETO2   | 1 | 1 | 1 | 3 |
| hsa-miR-877-3p   | NEK9    | 1 | 1 | 1 | 3 |
| hsa-miR-548j-5p  | NEK7    | 1 | 1 | 1 | 3 |
| hsa-miR-548y     | NEK7    | 1 | 1 | 1 | 3 |
| hsa-miR-6793-5p  | NEK7    | 1 | 1 | 1 | 3 |
| hsa-miR-1248     | NEGR1   | 1 | 1 | 1 | 3 |
| hsa-miR-18a-5p   | NEDD9   | 1 | 1 | 1 | 3 |
| hsa-miR-205-5p   | NDUFA4  | 1 | 1 | 1 | 3 |
| hsa-miR-7-5p     | NDFIP2  | 1 | 1 | 1 | 3 |
| hsa-miR-130b-3p  | NDEL1   | 1 | 1 | 1 | 3 |
| hsa-miR-4664-5p  | NCOA3   | 1 | 1 | 1 | 3 |
| hsa-miR-3664-5p  | NCOA3   | 1 | 1 | 1 | 3 |
| hsa-miR-215-5p   | NCOA3   | 1 | 1 | 1 | 3 |
| hsa-miR-20b-5p   | NCOA3   | 1 | 1 | 1 | 3 |
| hsa-miR-3150b-3p | NCOA3   | 1 | 1 | 1 | 3 |
| hsa-miR-200b-3p  | NCOA2   | 1 | 1 | 1 | 3 |
| hsa-miR-429      | NCOA2   | 1 | 1 | 1 | 3 |
| hsa-miR-200c-3p  | NCOA2   | 1 | 1 | 1 | 3 |
| hsa-miR-6728-5p  | NCL     | 1 | 1 | 1 | 3 |
| hsa-miR-522-3p   | NCL     | 1 | 1 | 1 | 3 |
| hsa-miR-130b-3p  | NCKAP5  | 1 | 1 | 1 | 3 |
| hsa-miR-3065-5p  | NCAM2   | 1 | 1 | 1 | 3 |
| hsa-miR-548d-3p  | NAV2    | 1 | 1 | 1 | 3 |
| hsa-miR-3619-5p  | NAP1L4  | 1 | 1 | 1 | 3 |



|                  |          |   |   |   |   |
|------------------|----------|---|---|---|---|
| hsa-miR-20b-5p   | NAGK     | 1 | 1 | 1 | 3 |
| hsa-miR-106a-5p  | NAGK     | 1 | 1 | 1 | 3 |
| hsa-miR-20b-5p   | NACC2    | 1 | 1 | 1 | 3 |
| hsa-miR-106a-5p  | NACC2    | 1 | 1 | 1 | 3 |
| hsa-miR-3189-3p  | NACC2    | 1 | 1 | 1 | 3 |
| hsa-miR-210-5p   | NACC2    | 1 | 1 | 1 | 3 |
| hsa-miR-6715a-3p | NACA2    | 1 | 1 | 1 | 3 |
| hsa-miR-6715b-3p | NACA2    | 1 | 1 | 1 | 3 |
| hsa-miR-106a-5p  | NABP1    | 1 | 1 | 1 | 3 |
| hsa-miR-20b-5p   | NABP1    | 1 | 1 | 1 | 3 |
| hsa-miR-301b-3p  | NAA50    | 1 | 1 | 1 | 3 |
| hsa-miR-130b-3p  | NAA50    | 1 | 1 | 1 | 3 |
| hsa-miR-130b-3p  | NAA30    | 1 | 1 | 1 | 3 |
| hsa-miR-183-3p   | N4BP2    | 1 | 1 | 1 | 3 |
| hsa-miR-31-5p    | MZT1     | 1 | 1 | 1 | 3 |
| hsa-miR-629-3p   | MYOCD    | 1 | 1 | 1 | 3 |
| hsa-miR-548d-3p  | MYO6     | 1 | 1 | 1 | 3 |
| hsa-miR-3150b-3p | MYO1C    | 1 | 1 | 1 | 3 |
| hsa-miR-363-3p   | MYO1B    | 1 | 1 | 1 | 3 |
| hsa-miR-363-3p   | MYLIP    | 1 | 1 | 1 | 3 |
| hsa-miR-4665-5p  | MYL12A   | 1 | 1 | 1 | 3 |
| hsa-miR-3065-5p  | MYEF2    | 1 | 1 | 1 | 3 |
| hsa-miR-767-5p   | MYCN     | 1 | 1 | 1 | 3 |
| hsa-miR-449c-5p  | MYC      | 1 | 1 | 1 | 3 |
| hsa-miR-548d-3p  | MYBL1    | 1 | 1 | 1 | 3 |
| hsa-miR-3065-5p  | MYBL1    | 1 | 1 | 1 | 3 |
| hsa-miR-138-5p   | MXD1     | 1 | 1 | 1 | 3 |
| hsa-miR-1226-3p  | MUC1     | 1 | 1 | 1 | 3 |
| hsa-miR-182-5p   | MTSS1    | 1 | 1 | 1 | 3 |
| hsa-miR-5684     | MTRNR2L8 | 1 | 1 | 1 | 3 |
| hsa-miR-5684     | MTRNR2L6 | 1 | 1 | 1 | 3 |
| hsa-miR-5684     | MTRNR2L1 | 1 | 1 | 1 | 3 |
| hsa-miR-548j-5p  | MTMR6    | 1 | 1 | 1 | 3 |
| hsa-miR-548y     | MTMR6    | 1 | 1 | 1 | 3 |
| hsa-miR-20b-5p   | MTMR3    | 1 | 1 | 1 | 3 |
| hsa-miR-106a-5p  | MTMR3    | 1 | 1 | 1 | 3 |
| hsa-miR-4665-5p  | MTHFR    | 1 | 1 | 1 | 3 |
| hsa-miR-1910-5p  | MTHFD2   | 1 | 1 | 1 | 3 |
| hsa-miR-9-5p     | MTHFD2   | 1 | 1 | 1 | 3 |
| hsa-miR-548j-5p  | MTHFD1   | 1 | 1 | 1 | 3 |
| hsa-miR-548y     | MTHFD1   | 1 | 1 | 1 | 3 |
| hsa-miR-940      | MTFMT    | 1 | 1 | 1 | 3 |
| hsa-miR-106a-5p  | MTF1     | 1 | 1 | 1 | 3 |
| hsa-miR-20b-5p   | MTF1     | 1 | 1 | 1 | 3 |
| hsa-miR-449c-5p  | MTDH     | 1 | 1 | 1 | 3 |
| hsa-miR-1248     | MTAP     | 1 | 1 | 1 | 3 |
| hsa-miR-200c-3p  | MSN      | 1 | 1 | 1 | 3 |
| hsa-miR-215-5p   | MSN      | 1 | 1 | 1 | 3 |
| hsa-miR-200b-3p  | MSN      | 1 | 1 | 1 | 3 |
| hsa-miR-106a-5p  | MSMO1    | 1 | 1 | 1 | 3 |
| hsa-miR-301b-3p  | MSMO1    | 1 | 1 | 1 | 3 |
| hsa-miR-130b-3p  | MSMO1    | 1 | 1 | 1 | 3 |
| hsa-miR-135b-3p  | MSL2     | 1 | 1 | 1 | 3 |
| hsa-miR-449b-3p  | MSL1     | 1 | 1 | 1 | 3 |
| hsa-miR-6891-5p  | MRRF     | 1 | 1 | 1 | 3 |
| hsa-miR-629-3p   | MRPS27   | 1 | 1 | 1 | 3 |
| hsa-miR-548f-3p  | MRPS10   | 1 | 1 | 1 | 3 |
| hsa-miR-527      | MRPL17   | 1 | 1 | 1 | 3 |

|                  |         |   |   |   |   |
|------------------|---------|---|---|---|---|
| hsa-miR-518a-5p  | MRPL17  | 1 | 1 | 1 | 3 |
| hsa-miR-548j-5p  | MPZL1   | 1 | 1 | 1 | 3 |
| hsa-miR-548y     | MPZL1   | 1 | 1 | 1 | 3 |
| hsa-miR-548f-3p  | MPP5    | 1 | 1 | 1 | 3 |
| hsa-miR-3619-5p  | MPDU1   | 1 | 1 | 1 | 3 |
| hsa-miR-940      | MORN4   | 1 | 1 | 1 | 3 |
| hsa-miR-767-5p   | MORF4L2 | 1 | 1 | 1 | 3 |
| hsa-miR-96-5p    | MORF4L1 | 1 | 1 | 1 | 3 |
| hsa-miR-20b-5p   | MORF4L1 | 1 | 1 | 1 | 3 |
| hsa-miR-767-5p   | MORF4L1 | 1 | 1 | 1 | 3 |
| hsa-miR-1226-3p  | MORF4L1 | 1 | 1 | 1 | 3 |
| hsa-miR-106a-5p  | MORF4L1 | 1 | 1 | 1 | 3 |
| hsa-miR-3662     | MOB4    | 1 | 1 | 1 | 3 |
| hsa-miR-940      | MOB3A   | 1 | 1 | 1 | 3 |
| hsa-miR-522-3p   | MOB1B   | 1 | 1 | 1 | 3 |
| hsa-miR-653-5p   | MOB1B   | 1 | 1 | 1 | 3 |
| hsa-miR-363-3p   | MOAP1   | 1 | 1 | 1 | 3 |
| hsa-miR-4446-3p  | MNT     | 1 | 1 | 1 | 3 |
| hsa-miR-301b-3p  | MMGT1   | 1 | 1 | 1 | 3 |
| hsa-miR-130b-3p  | MMGT1   | 1 | 1 | 1 | 3 |
| hsa-miR-205-5p   | MMD     | 1 | 1 | 1 | 3 |
| hsa-miR-4763-5p  | MMAB    | 1 | 1 | 1 | 3 |
| hsa-miR-4763-5p  | MLXIPL  | 1 | 1 | 1 | 3 |
| hsa-miR-940      | MLXIP   | 1 | 1 | 1 | 3 |
| hsa-miR-106a-3p  | MLLT10  | 1 | 1 | 1 | 3 |
| hsa-miR-940      | MLEC    | 1 | 1 | 1 | 3 |
| hsa-miR-6715a-3p | MKX     | 1 | 1 | 1 | 3 |
| hsa-miR-636      | MKNK2   | 1 | 1 | 1 | 3 |
| hsa-miR-106a-5p  | MKNK2   | 1 | 1 | 1 | 3 |
| hsa-miR-20b-5p   | MKNK2   | 1 | 1 | 1 | 3 |
| hsa-miR-182-5p   | MITF    | 1 | 1 | 1 | 3 |
| hsa-miR-4665-5p  | MINK1   | 1 | 1 | 1 | 3 |
| hsa-miR-106a-5p  | MINK1   | 1 | 1 | 1 | 3 |
| hsa-miR-15b-3p   | MINK1   | 1 | 1 | 1 | 3 |
| hsa-miR-3662     | MINK1   | 1 | 1 | 1 | 3 |
| hsa-miR-20b-5p   | MINK1   | 1 | 1 | 1 | 3 |
| hsa-miR-7-5p     | MIF4GD  | 1 | 1 | 1 | 3 |
| hsa-miR-20b-3p   | MIER1   | 1 | 1 | 1 | 3 |
| hsa-miR-20b-5p   | MIDN    | 1 | 1 | 1 | 3 |
| hsa-miR-106a-5p  | MIDN    | 1 | 1 | 1 | 3 |
| hsa-miR-130b-3p  | MID1IP1 | 1 | 1 | 1 | 3 |
| hsa-miR-548f-3p  | MID1IP1 | 1 | 1 | 1 | 3 |
| hsa-miR-301b-3p  | MID1IP1 | 1 | 1 | 1 | 3 |
| hsa-miR-25-5p    | MICAL2  | 1 | 1 | 1 | 3 |
| hsa-miR-629-3p   | MGAT5   | 1 | 1 | 1 | 3 |
| hsa-miR-548d-3p  | MGARP   | 1 | 1 | 1 | 3 |
| hsa-miR-3074-5p  | MFSD6   | 1 | 1 | 1 | 3 |
| hsa-miR-3619-5p  | MFN2    | 1 | 1 | 1 | 3 |
| hsa-miR-363-3p   | MFF     | 1 | 1 | 1 | 3 |
| hsa-miR-629-3p   | MEX3A   | 1 | 1 | 1 | 3 |
| hsa-miR-4665-5p  | MEX3A   | 1 | 1 | 1 | 3 |
| hsa-miR-449b-5p  | MET     | 1 | 1 | 1 | 3 |
| hsa-miR-449a     | MET     | 1 | 1 | 1 | 3 |
| hsa-miR-3074-5p  | MESDC2  | 1 | 1 | 1 | 3 |
| hsa-miR-9-5p     | MESDC1  | 1 | 1 | 1 | 3 |
| hsa-miR-363-3p   | MED19   | 1 | 1 | 1 | 3 |
| hsa-miR-96-5p    | MED1    | 1 | 1 | 1 | 3 |
| hsa-miR-205-5p   | MED1    | 1 | 1 | 1 | 3 |

|                 |          |   |   |   |   |
|-----------------|----------|---|---|---|---|
| hsa-miR-6891-5p | MECP2    | 1 | 1 | 1 | 3 |
| hsa-miR-449a    | MDM4     | 1 | 1 | 1 | 3 |
| hsa-miR-449b-5p | MDM4     | 1 | 1 | 1 | 3 |
| hsa-miR-210-3p  | MDGA1    | 1 | 1 | 1 | 3 |
| hsa-miR-548j-5p | MDFIC    | 1 | 1 | 1 | 3 |
| hsa-miR-548y    | MDFIC    | 1 | 1 | 1 | 3 |
| hsa-miR-363-3p  | MCOLN2   | 1 | 1 | 1 | 3 |
| hsa-miR-216b-5p | MCM4     | 1 | 1 | 1 | 3 |
| hsa-miR-20b-5p  | MCL1     | 1 | 1 | 1 | 3 |
| hsa-miR-20b-5p  | MCC      | 1 | 1 | 1 | 3 |
| hsa-miR-106a-5p | MCC      | 1 | 1 | 1 | 3 |
| hsa-miR-301b-3p | MCC      | 1 | 1 | 1 | 3 |
| hsa-miR-130b-3p | MCC      | 1 | 1 | 1 | 3 |
| hsa-miR-9-5p    | MCC      | 1 | 1 | 1 | 3 |
| hsa-miR-548d-3p | MBNL3    | 1 | 1 | 1 | 3 |
| hsa-miR-301b-3p | MBNL3    | 1 | 1 | 1 | 3 |
| hsa-miR-130b-3p | MBNL3    | 1 | 1 | 1 | 3 |
| hsa-miR-629-3p  | MBNL1    | 1 | 1 | 1 | 3 |
| hsa-miR-211-5p  | MBNL1    | 1 | 1 | 1 | 3 |
| hsa-miR-130b-3p | MBNL1    | 1 | 1 | 1 | 3 |
| hsa-miR-301b-3p | MBNL1    | 1 | 1 | 1 | 3 |
| hsa-miR-1301-3p | MBNL1    | 1 | 1 | 1 | 3 |
| hsa-miR-6499-3p | MBD6     | 1 | 1 | 1 | 3 |
| hsa-miR-96-5p   | MBD4     | 1 | 1 | 1 | 3 |
| hsa-miR-130b-3p | MB21D2   | 1 | 1 | 1 | 3 |
| hsa-miR-301b-3p | MB21D2   | 1 | 1 | 1 | 3 |
| hsa-miR-3176    | MAU2     | 1 | 1 | 1 | 3 |
| hsa-miR-200b-3p | MATR3    | 1 | 1 | 1 | 3 |
| hsa-miR-106a-5p | MASTL    | 1 | 1 | 1 | 3 |
| hsa-miR-20b-5p  | MASTL    | 1 | 1 | 1 | 3 |
| hsa-miR-449c-5p | MARVELD2 | 1 | 1 | 1 | 3 |
| hsa-miR-3934-3p | MARCKSL1 | 1 | 1 | 1 | 3 |
| hsa-miR-1266-5p | MARCKSL1 | 1 | 1 | 1 | 3 |
| hsa-miR-527     | MARCKS   | 1 | 1 | 1 | 3 |
| hsa-miR-518a-5p | MARCKS   | 1 | 1 | 1 | 3 |
| hsa-miR-205-5p  | MARCKS   | 1 | 1 | 1 | 3 |
| hsa-miR-106a-5p | MAPRE3   | 1 | 1 | 1 | 3 |
| hsa-miR-301b-3p | MAPRE3   | 1 | 1 | 1 | 3 |
| hsa-miR-20b-5p  | MAPRE3   | 1 | 1 | 1 | 3 |
| hsa-miR-130b-3p | MAPRE3   | 1 | 1 | 1 | 3 |
| hsa-miR-18a-3p  | MAPKBP1  | 1 | 1 | 1 | 3 |
| hsa-miR-483-3p  | MAPKAPK3 | 1 | 1 | 1 | 3 |
| hsa-miR-888-5p  | MAPK8    | 1 | 1 | 1 | 3 |
| hsa-miR-3662    | MAPK8    | 1 | 1 | 1 | 3 |
| hsa-miR-200c-3p | MAPK7    | 1 | 1 | 1 | 3 |
| hsa-miR-429     | MAPK7    | 1 | 1 | 1 | 3 |
| hsa-miR-3662    | MAPK6    | 1 | 1 | 1 | 3 |
| hsa-miR-629-3p  | MAPK14   | 1 | 1 | 1 | 3 |
| hsa-miR-106a-5p | MAPK1    | 1 | 1 | 1 | 3 |
| hsa-miR-301b-3p | MAPK1    | 1 | 1 | 1 | 3 |
| hsa-miR-130b-3p | MAPK1    | 1 | 1 | 1 | 3 |
| hsa-miR-20b-5p  | MAPK1    | 1 | 1 | 1 | 3 |
| hsa-miR-449b-3p | MAPK1    | 1 | 1 | 1 | 3 |
| hsa-miR-18a-5p  | MAP7D1   | 1 | 1 | 1 | 3 |
| hsa-miR-7974    | MAP7D1   | 1 | 1 | 1 | 3 |
| hsa-miR-1266-5p | MAP3K9   | 1 | 1 | 1 | 3 |
| hsa-miR-4446-3p | MAP3K9   | 1 | 1 | 1 | 3 |
| hsa-miR-130b-3p | MAP3K9   | 1 | 1 | 1 | 3 |

|                  |         |   |   |   |   |
|------------------|---------|---|---|---|---|
| hsa-miR-1248     | MAP3K9  | 1 | 1 | 1 | 3 |
| hsa-miR-301b-3p  | MAP3K9  | 1 | 1 | 1 | 3 |
| hsa-miR-425-5p   | MAP3K5  | 1 | 1 | 1 | 3 |
| hsa-miR-9-5p     | MAP3K3  | 1 | 1 | 1 | 3 |
| hsa-miR-20b-5p   | MAP3K3  | 1 | 1 | 1 | 3 |
| hsa-miR-96-5p    | MAP3K3  | 1 | 1 | 1 | 3 |
| hsa-miR-106a-5p  | MAP3K2  | 1 | 1 | 1 | 3 |
| hsa-miR-20b-5p   | MAP3K2  | 1 | 1 | 1 | 3 |
| hsa-miR-138-5p   | MAP3K11 | 1 | 1 | 1 | 3 |
| hsa-miR-425-5p   | MAP2K6  | 1 | 1 | 1 | 3 |
| hsa-miR-363-3p   | MAP2K4  | 1 | 1 | 1 | 3 |
| hsa-miR-449a     | MAP2K1  | 1 | 1 | 1 | 3 |
| hsa-miR-363-3p   | MAP1B   | 1 | 1 | 1 | 3 |
| hsa-miR-9-5p     | MAP1B   | 1 | 1 | 1 | 3 |
| hsa-miR-205-3p   | MANEA   | 1 | 1 | 1 | 3 |
| hsa-miR-130b-5p  | MAML1   | 1 | 1 | 1 | 3 |
| hsa-miR-1301-3p  | MAGI2   | 1 | 1 | 1 | 3 |
| hsa-miR-141-3p   | MACC1   | 1 | 1 | 1 | 3 |
| hsa-miR-4763-5p  | MACC1   | 1 | 1 | 1 | 3 |
| hsa-miR-200a-3p  | MACC1   | 1 | 1 | 1 | 3 |
| hsa-miR-211-5p   | M6PR    | 1 | 1 | 1 | 3 |
| hsa-miR-135b-5p  | LZTS1   | 1 | 1 | 1 | 3 |
| hsa-miR-20b-5p   | LYSMD3  | 1 | 1 | 1 | 3 |
| hsa-miR-205-5p   | LYSMD3  | 1 | 1 | 1 | 3 |
| hsa-miR-526b-5p  | LYPLA1  | 1 | 1 | 1 | 3 |
| hsa-miR-7-5p     | LYPD3   | 1 | 1 | 1 | 3 |
| hsa-miR-205-3p   | LUZP2   | 1 | 1 | 1 | 3 |
| hsa-miR-3619-5p  | LUZP1   | 1 | 1 | 1 | 3 |
| hsa-miR-7-5p     | LUC7L2  | 1 | 1 | 1 | 3 |
| hsa-miR-182-5p   | LSM14A  | 1 | 1 | 1 | 3 |
| hsa-miR-892a     | LSM14A  | 1 | 1 | 1 | 3 |
| hsa-miR-548d-3p  | LSM14A  | 1 | 1 | 1 | 3 |
| hsa-miR-3127-3p  | LSAMP   | 1 | 1 | 1 | 3 |
| hsa-miR-205-5p   | LRRK2   | 1 | 1 | 1 | 3 |
| hsa-miR-577      | LRRFIP2 | 1 | 1 | 1 | 3 |
| hsa-miR-184      | LRRC8A  | 1 | 1 | 1 | 3 |
| hsa-miR-7-5p     | LRRC59  | 1 | 1 | 1 | 3 |
| hsa-miR-629-3p   | LRRC38  | 1 | 1 | 1 | 3 |
| hsa-miR-3127-3p  | LRRC20  | 1 | 1 | 1 | 3 |
| hsa-miR-3150b-3p | LRRC20  | 1 | 1 | 1 | 3 |
| hsa-miR-130b-3p  | LRP8    | 1 | 1 | 1 | 3 |
| hsa-miR-183-5p   | LRP6    | 1 | 1 | 1 | 3 |
| hsa-miR-200c-3p  | LRP1B   | 1 | 1 | 1 | 3 |
| hsa-miR-205-5p   | LRP1    | 1 | 1 | 1 | 3 |
| hsa-miR-20b-5p   | LPGAT1  | 1 | 1 | 1 | 3 |
| hsa-miR-4665-5p  | LPCAT3  | 1 | 1 | 1 | 3 |
| hsa-miR-205-5p   | LPCAT1  | 1 | 1 | 1 | 3 |
| hsa-miR-200c-3p  | LPAR1   | 1 | 1 | 1 | 3 |
| hsa-miR-200b-3p  | LOX     | 1 | 1 | 1 | 3 |
| hsa-miR-449c-3p  | LMNB1   | 1 | 1 | 1 | 3 |
| hsa-miR-1248     | LMNB1   | 1 | 1 | 1 | 3 |
| hsa-miR-1301-3p  | LMNB1   | 1 | 1 | 1 | 3 |
| hsa-miR-301b-3p  | LMLN    | 1 | 1 | 1 | 3 |
| hsa-miR-130b-3p  | LMLN    | 1 | 1 | 1 | 3 |
| hsa-miR-548f-3p  | LMLN    | 1 | 1 | 1 | 3 |
| hsa-miR-940      | LIX1L   | 1 | 1 | 1 | 3 |
| hsa-miR-449c-5p  | LITAF   | 1 | 1 | 1 | 3 |
| hsa-miR-1301-3p  | LIPA    | 1 | 1 | 1 | 3 |

|                  |          |   |   |   |   |
|------------------|----------|---|---|---|---|
| hsa-miR-548j-5p  | LIPA     | 1 | 1 | 1 | 3 |
| hsa-miR-548y     | LIPA     | 1 | 1 | 1 | 3 |
| hsa-miR-18b-5p   | LIN54    | 1 | 1 | 1 | 3 |
| hsa-miR-18a-5p   | LIN54    | 1 | 1 | 1 | 3 |
| hsa-miR-215-5p   | LIMS1    | 1 | 1 | 1 | 3 |
| hsa-miR-20b-5p   | LIMK1    | 1 | 1 | 1 | 3 |
| hsa-miR-106a-5p  | LIMK1    | 1 | 1 | 1 | 3 |
| hsa-miR-3176     | LIMD1    | 1 | 1 | 1 | 3 |
| hsa-miR-20b-5p   | LIMA1    | 1 | 1 | 1 | 3 |
| hsa-miR-106a-5p  | LIMA1    | 1 | 1 | 1 | 3 |
| hsa-miR-363-3p   | LHFPL2   | 1 | 1 | 1 | 3 |
| hsa-miR-9-5p     | LHFPL2   | 1 | 1 | 1 | 3 |
| hsa-miR-526b-5p  | LEPROTL1 | 1 | 1 | 1 | 3 |
| hsa-miR-629-3p   | LEMD2    | 1 | 1 | 1 | 3 |
| hsa-miR-449a     | LEF1     | 1 | 1 | 1 | 3 |
| hsa-miR-9-5p     | LDLRAP1  | 1 | 1 | 1 | 3 |
| hsa-miR-106a-5p  | LDLR     | 1 | 1 | 1 | 3 |
| hsa-miR-130b-3p  | LDLR     | 1 | 1 | 1 | 3 |
| hsa-miR-20b-5p   | LDLR     | 1 | 1 | 1 | 3 |
| hsa-miR-301b-3p  | LDLR     | 1 | 1 | 1 | 3 |
| hsa-miR-489-3p   | LDHA     | 1 | 1 | 1 | 3 |
| hsa-miR-205-5p   | LCOR     | 1 | 1 | 1 | 3 |
| hsa-miR-3923     | LCOR     | 1 | 1 | 1 | 3 |
| hsa-miR-425-5p   | LCOR     | 1 | 1 | 1 | 3 |
| hsa-miR-130b-3p  | LCLAT1   | 1 | 1 | 1 | 3 |
| hsa-miR-301b-3p  | LCLAT1   | 1 | 1 | 1 | 3 |
| hsa-miR-130b-3p  | LBR      | 1 | 1 | 1 | 3 |
| hsa-miR-31-5p    | LATS2    | 1 | 1 | 1 | 3 |
| hsa-miR-20b-5p   | LASP1    | 1 | 1 | 1 | 3 |
| hsa-miR-106a-5p  | LASP1    | 1 | 1 | 1 | 3 |
| hsa-miR-4446-3p  | LAPTM5   | 1 | 1 | 1 | 3 |
| hsa-miR-6854-5p  | LAPTM4B  | 1 | 1 | 1 | 3 |
| hsa-miR-20b-5p   | LAPTM4A  | 1 | 1 | 1 | 3 |
| hsa-miR-106a-5p  | LAPTM4A  | 1 | 1 | 1 | 3 |
| hsa-miR-548d-3p  | LAMTOR1  | 1 | 1 | 1 | 3 |
| hsa-miR-1276     | LAMP2    | 1 | 1 | 1 | 3 |
| hsa-miR-205-5p   | LAMC1    | 1 | 1 | 1 | 3 |
| hsa-miR-183-3p   | LAMA2    | 1 | 1 | 1 | 3 |
| hsa-miR-215-5p   | L2HGDH   | 1 | 1 | 1 | 3 |
| hsa-miR-18a-3p   | KY       | 1 | 1 | 1 | 3 |
| hsa-miR-629-3p   | KRBOX4   | 1 | 1 | 1 | 3 |
| hsa-miR-96-5p    | KRAS     | 1 | 1 | 1 | 3 |
| hsa-miR-877-5p   | KRAS     | 1 | 1 | 1 | 3 |
| hsa-miR-1248     | KPNA6    | 1 | 1 | 1 | 3 |
| hsa-miR-106a-5p  | KPNA2    | 1 | 1 | 1 | 3 |
| hsa-miR-6715a-3p | KPNA2    | 1 | 1 | 1 | 3 |
| hsa-miR-20b-5p   | KPNA2    | 1 | 1 | 1 | 3 |
| hsa-miR-3662     | KPNA1    | 1 | 1 | 1 | 3 |
| hsa-miR-1301-3p  | KMT2D    | 1 | 1 | 1 | 3 |
| hsa-miR-4758-3p  | KMT2D    | 1 | 1 | 1 | 3 |
| hsa-miR-3616-3p  | KMT2D    | 1 | 1 | 1 | 3 |
| hsa-miR-20b-5p   | KMT2B    | 1 | 1 | 1 | 3 |
| hsa-miR-106a-5p  | KMT2B    | 1 | 1 | 1 | 3 |
| hsa-miR-183-5p   | KLRD1    | 1 | 1 | 1 | 3 |
| hsa-miR-211-5p   | KLHL40   | 1 | 1 | 1 | 3 |
| hsa-miR-4665-5p  | KLHL28   | 1 | 1 | 1 | 3 |
| hsa-miR-106a-5p  | KLHL28   | 1 | 1 | 1 | 3 |
| hsa-miR-20b-5p   | KLHL28   | 1 | 1 | 1 | 3 |

|                 |           |   |   |   |   |
|-----------------|-----------|---|---|---|---|
| hsa-miR-183-5p  | KLHL24    | 1 | 1 | 1 | 3 |
| hsa-miR-183-5p  | KLHL23    | 1 | 1 | 1 | 3 |
| hsa-miR-892a    | KLHL23    | 1 | 1 | 1 | 3 |
| hsa-miR-20b-5p  | KLHL20    | 1 | 1 | 1 | 3 |
| hsa-miR-940     | KLHL18    | 1 | 1 | 1 | 3 |
| hsa-miR-363-3p  | KLHL15    | 1 | 1 | 1 | 3 |
| hsa-miR-1266-5p | KLHL12    | 1 | 1 | 1 | 3 |
| hsa-miR-6891-5p | KLHDC3    | 1 | 1 | 1 | 3 |
| hsa-miR-363-3p  | KLHDC10   | 1 | 1 | 1 | 3 |
| hsa-miR-548j-5p | KLF7      | 1 | 1 | 1 | 3 |
| hsa-miR-548y    | KLF7      | 1 | 1 | 1 | 3 |
| hsa-miR-9-5p    | KLF5      | 1 | 1 | 1 | 3 |
| hsa-miR-135b-5p | KLF4      | 1 | 1 | 1 | 3 |
| hsa-miR-7-5p    | KLF4      | 1 | 1 | 1 | 3 |
| hsa-miR-106a-5p | KLF3      | 1 | 1 | 1 | 3 |
| hsa-miR-20b-5p  | KLF3      | 1 | 1 | 1 | 3 |
| hsa-miR-449c-3p | KLF3      | 1 | 1 | 1 | 3 |
| hsa-miR-3619-5p | KLF16     | 1 | 1 | 1 | 3 |
| hsa-miR-31-5p   | KLF13     | 1 | 1 | 1 | 3 |
| hsa-miR-216b-5p | KLF12     | 1 | 1 | 1 | 3 |
| hsa-miR-141-3p  | KLF11     | 1 | 1 | 1 | 3 |
| hsa-miR-200a-3p | KLF11     | 1 | 1 | 1 | 3 |
| hsa-miR-106a-5p | KLF10     | 1 | 1 | 1 | 3 |
| hsa-miR-20b-5p  | KLF10     | 1 | 1 | 1 | 3 |
| hsa-miR-3127-3p | KIRREL    | 1 | 1 | 1 | 3 |
| hsa-miR-183-5p  | KIF5C     | 1 | 1 | 1 | 3 |
| hsa-miR-5684    | KIF5B     | 1 | 1 | 1 | 3 |
| hsa-miR-363-3p  | KIF5B     | 1 | 1 | 1 | 3 |
| hsa-miR-892a    | KIF5B     | 1 | 1 | 1 | 3 |
| hsa-miR-215-5p  | KIF5B     | 1 | 1 | 1 | 3 |
| hsa-miR-183-5p  | KIF2A     | 1 | 1 | 1 | 3 |
| hsa-miR-20b-5p  | KIF23     | 1 | 1 | 1 | 3 |
| hsa-miR-106a-5p | KIF23     | 1 | 1 | 1 | 3 |
| hsa-miR-1301-3p | KIF23     | 1 | 1 | 1 | 3 |
| hsa-miR-6854-5p | KIF21B    | 1 | 1 | 1 | 3 |
| hsa-miR-7-5p    | KIF16B    | 1 | 1 | 1 | 3 |
| hsa-miR-200c-3p | KIF13A    | 1 | 1 | 1 | 3 |
| hsa-miR-130b-3p | KIF13A    | 1 | 1 | 1 | 3 |
| hsa-miR-301b-3p | KIF13A    | 1 | 1 | 1 | 3 |
| hsa-miR-429     | KIF13A    | 1 | 1 | 1 | 3 |
| hsa-miR-200b-3p | KIF13A    | 1 | 1 | 1 | 3 |
| hsa-miR-1226-3p | KIAA1644  | 1 | 1 | 1 | 3 |
| hsa-miR-93-3p   | KIAA1549L | 1 | 1 | 1 | 3 |
| hsa-miR-200a-3p | KIAA1549  | 1 | 1 | 1 | 3 |
| hsa-miR-141-3p  | KIAA1549  | 1 | 1 | 1 | 3 |
| hsa-miR-548d-3p | KIAA1456  | 1 | 1 | 1 | 3 |
| hsa-miR-6815-3p | KIAA1191  | 1 | 1 | 1 | 3 |
| hsa-miR-20b-5p  | KIAA1147  | 1 | 1 | 1 | 3 |
| hsa-miR-106a-5p | KIAA1147  | 1 | 1 | 1 | 3 |
| hsa-miR-363-3p  | KIAA1109  | 1 | 1 | 1 | 3 |
| hsa-miR-20b-5p  | KIAA0922  | 1 | 1 | 1 | 3 |
| hsa-miR-106a-5p | KIAA0922  | 1 | 1 | 1 | 3 |
| hsa-miR-106a-5p | KIAA0513  | 1 | 1 | 1 | 3 |
| hsa-miR-20b-5p  | KIAA0513  | 1 | 1 | 1 | 3 |
| hsa-miR-93-3p   | KIAA0355  | 1 | 1 | 1 | 3 |
| hsa-miR-548y    | KHSRP     | 1 | 1 | 1 | 3 |
| hsa-miR-548j-5p | KHSRP     | 1 | 1 | 1 | 3 |
| hsa-miR-200b-3p | KDR       | 1 | 1 | 1 | 3 |

|                  |          |   |   |   |   |
|------------------|----------|---|---|---|---|
| hsa-miR-200c-3p  | KDR      | 1 | 1 | 1 | 3 |
| hsa-miR-548j-5p  | KDM5A    | 1 | 1 | 1 | 3 |
| hsa-miR-548y     | KDM5A    | 1 | 1 | 1 | 3 |
| hsa-miR-182-5p   | KDM5A    | 1 | 1 | 1 | 3 |
| hsa-miR-200c-5p  | KDELR2   | 1 | 1 | 1 | 3 |
| hsa-miR-130b-3p  | KCTD20   | 1 | 1 | 1 | 3 |
| hsa-miR-3619-5p  | KCTD15   | 1 | 1 | 1 | 3 |
| hsa-miR-183-3p   | KCTD12   | 1 | 1 | 1 | 3 |
| hsa-miR-183-3p   | KCNT2    | 1 | 1 | 1 | 3 |
| hsa-miR-548f-3p  | KCNS2    | 1 | 1 | 1 | 3 |
| hsa-miR-629-3p   | KCNQ3    | 1 | 1 | 1 | 3 |
| hsa-miR-512-3p   | KCNJ8    | 1 | 1 | 1 | 3 |
| hsa-miR-1304-3p  | KCNJ6    | 1 | 1 | 1 | 3 |
| hsa-miR-9-5p     | KCNJ2    | 1 | 1 | 1 | 3 |
| hsa-miR-7974     | KCNIP3   | 1 | 1 | 1 | 3 |
| hsa-miR-3150b-3p | KCND1    | 1 | 1 | 1 | 3 |
| hsa-miR-210-3p   | KCMF1    | 1 | 1 | 1 | 3 |
| hsa-miR-106a-5p  | KATNAL1  | 1 | 1 | 1 | 3 |
| hsa-miR-205-3p   | KATNAL1  | 1 | 1 | 1 | 3 |
| hsa-miR-548y     | KATNAL1  | 1 | 1 | 1 | 3 |
| hsa-miR-548j-5p  | KATNAL1  | 1 | 1 | 1 | 3 |
| hsa-miR-20b-5p   | KATNAL1  | 1 | 1 | 1 | 3 |
| hsa-miR-6499-3p  | KAT7     | 1 | 1 | 1 | 3 |
| hsa-miR-3616-5p  | KAT6B    | 1 | 1 | 1 | 3 |
| hsa-miR-548f-3p  | KANSL1   | 1 | 1 | 1 | 3 |
| hsa-miR-200b-3p  | JUN      | 1 | 1 | 1 | 3 |
| hsa-miR-429      | JUN      | 1 | 1 | 1 | 3 |
| hsa-miR-200c-3p  | JUN      | 1 | 1 | 1 | 3 |
| hsa-miR-548f-3p  | JMY      | 1 | 1 | 1 | 3 |
| hsa-miR-522-3p   | JMY      | 1 | 1 | 1 | 3 |
| hsa-miR-96-5p    | JAZF1    | 1 | 1 | 1 | 3 |
| hsa-miR-31-5p    | JAZF1    | 1 | 1 | 1 | 3 |
| hsa-miR-301b-3p  | JARID2   | 1 | 1 | 1 | 3 |
| hsa-miR-130b-3p  | JARID2   | 1 | 1 | 1 | 3 |
| hsa-miR-20b-5p   | JAK1     | 1 | 1 | 1 | 3 |
| hsa-miR-3619-5p  | JAG2     | 1 | 1 | 1 | 3 |
| hsa-miR-9-3p     | ITPRIPL2 | 1 | 1 | 1 | 3 |
| hsa-miR-363-3p   | ITPR1    | 1 | 1 | 1 | 3 |
| hsa-miR-211-5p   | ITPR1    | 1 | 1 | 1 | 3 |
| hsa-miR-183-5p   | ITGB1    | 1 | 1 | 1 | 3 |
| hsa-miR-9-3p     | ITGB1    | 1 | 1 | 1 | 3 |
| hsa-miR-215-5p   | ITGAV    | 1 | 1 | 1 | 3 |
| hsa-miR-3065-5p  | ITGA1    | 1 | 1 | 1 | 3 |
| hsa-miR-20b-5p   | ITCH     | 1 | 1 | 1 | 3 |
| hsa-miR-210-3p   | ISCU     | 1 | 1 | 1 | 3 |
| hsa-miR-301a-5p  | IRS2     | 1 | 1 | 1 | 3 |
| hsa-miR-301b-5p  | IRS2     | 1 | 1 | 1 | 3 |
| hsa-miR-7-5p     | IRS2     | 1 | 1 | 1 | 3 |
| hsa-miR-7-5p     | IRS1     | 1 | 1 | 1 | 3 |
| hsa-miR-940      | IRGQ     | 1 | 1 | 1 | 3 |
| hsa-miR-4724-5p  | IRF2BP2  | 1 | 1 | 1 | 3 |
| hsa-miR-18a-5p   | IRF2     | 1 | 1 | 1 | 3 |
| hsa-miR-6728-5p  | IRF2     | 1 | 1 | 1 | 3 |
| hsa-miR-18b-5p   | IRF2     | 1 | 1 | 1 | 3 |
| hsa-miR-301b-3p  | IRF1     | 1 | 1 | 1 | 3 |
| hsa-miR-130b-3p  | IRF1     | 1 | 1 | 1 | 3 |
| hsa-miR-155-3p   | IRAK3    | 1 | 1 | 1 | 3 |
| hsa-miR-146a-5p  | IRAK1    | 1 | 1 | 1 | 3 |

|                  |          |   |   |   |   |
|------------------|----------|---|---|---|---|
| hsa-miR-940      | IQSEC2   | 1 | 1 | 1 | 3 |
| hsa-miR-449c-3p  | IPO7     | 1 | 1 | 1 | 3 |
| hsa-miR-141-3p   | IPO5     | 1 | 1 | 1 | 3 |
| hsa-miR-200a-3p  | IPO5     | 1 | 1 | 1 | 3 |
| hsa-miR-548y     | IPMK     | 1 | 1 | 1 | 3 |
| hsa-miR-548j-5p  | IPMK     | 1 | 1 | 1 | 3 |
| hsa-miR-1276     | INTS2    | 1 | 1 | 1 | 3 |
| hsa-miR-363-3p   | INSIG1   | 1 | 1 | 1 | 3 |
| hsa-miR-548f-3p  | INSIG1   | 1 | 1 | 1 | 3 |
| hsa-miR-3176     | INO80D   | 1 | 1 | 1 | 3 |
| hsa-miR-1229-3p  | INO80D   | 1 | 1 | 1 | 3 |
| hsa-miR-141-5p   | INO80D   | 1 | 1 | 1 | 3 |
| hsa-miR-526b-5p  | INIP     | 1 | 1 | 1 | 3 |
| hsa-miR-1301-3p  | IMPDH1   | 1 | 1 | 1 | 3 |
| hsa-miR-548f-3p  | ILDR1    | 1 | 1 | 1 | 3 |
| hsa-miR-548j-5p  | IL6ST    | 1 | 1 | 1 | 3 |
| hsa-miR-548y     | IL6ST    | 1 | 1 | 1 | 3 |
| hsa-miR-877-3p   | IL2RA    | 1 | 1 | 1 | 3 |
| hsa-miR-211-5p   | IL11     | 1 | 1 | 1 | 3 |
| hsa-miR-211-5p   | IKZF2    | 1 | 1 | 1 | 3 |
| hsa-miR-7-5p     | IGSF8    | 1 | 1 | 1 | 3 |
| hsa-miR-138-5p   | IGLON5   | 1 | 1 | 1 | 3 |
| hsa-miR-211-5p   | IGF2R    | 1 | 1 | 1 | 3 |
| hsa-miR-18a-5p   | IGF2BP2  | 1 | 1 | 1 | 3 |
| hsa-miR-877-5p   | IGF2BP2  | 1 | 1 | 1 | 3 |
| hsa-miR-577      | IGF2BP1  | 1 | 1 | 1 | 3 |
| hsa-miR-6891-5p  | IGF2     | 1 | 1 | 1 | 3 |
| hsa-miR-9-3p     | IGF2     | 1 | 1 | 1 | 3 |
| hsa-miR-4665-5p  | IGF1R    | 1 | 1 | 1 | 3 |
| hsa-miR-483-3p   | IGF1     | 1 | 1 | 1 | 3 |
| hsa-miR-1248     | IFIT1    | 1 | 1 | 1 | 3 |
| hsa-miR-3616-3p  | IFFO2    | 1 | 1 | 1 | 3 |
| hsa-miR-130b-3p  | IER3IP1  | 1 | 1 | 1 | 3 |
| hsa-miR-301b-3p  | IER3IP1  | 1 | 1 | 1 | 3 |
| hsa-miR-526b-5p  | IDS      | 1 | 1 | 1 | 3 |
| hsa-miR-3150b-3p | IDH3A    | 1 | 1 | 1 | 3 |
| hsa-miR-183-5p   | IDH2     | 1 | 1 | 1 | 3 |
| hsa-miR-7-5p     | IDE      | 1 | 1 | 1 | 3 |
| hsa-miR-548f-3p  | ID4      | 1 | 1 | 1 | 3 |
| hsa-miR-940      | ICMT     | 1 | 1 | 1 | 3 |
| hsa-miR-205-3p   | ICK      | 1 | 1 | 1 | 3 |
| hsa-miR-1304-3p  | IBA57    | 1 | 1 | 1 | 3 |
| hsa-miR-1229-3p  | HUNK     | 1 | 1 | 1 | 3 |
| hsa-miR-20b-5p   | HSPA8    | 1 | 1 | 1 | 3 |
| hsa-miR-106a-5p  | HSPA8    | 1 | 1 | 1 | 3 |
| hsa-miR-6854-5p  | HSPA4    | 1 | 1 | 1 | 3 |
| hsa-miR-449a     | HSPA1B   | 1 | 1 | 1 | 3 |
| hsa-miR-449b-5p  | HSPA1B   | 1 | 1 | 1 | 3 |
| hsa-miR-141-5p   | HSP90AA1 | 1 | 1 | 1 | 3 |
| hsa-miR-4724-5p  | HSP90AA1 | 1 | 1 | 1 | 3 |
| hsa-miR-18a-5p   | HSF2     | 1 | 1 | 1 | 3 |
| hsa-miR-934      | HSBP1    | 1 | 1 | 1 | 3 |
| hsa-miR-130b-5p  | HRH1     | 1 | 1 | 1 | 3 |
| hsa-miR-130b-3p  | HPRT1    | 1 | 1 | 1 | 3 |
| hsa-miR-301b-3p  | HPRT1    | 1 | 1 | 1 | 3 |
| hsa-miR-211-5p   | HOXC8    | 1 | 1 | 1 | 3 |
| hsa-miR-31-5p    | HOXC13   | 1 | 1 | 1 | 3 |
| hsa-miR-141-3p   | HOXB5    | 1 | 1 | 1 | 3 |



|                  |         |   |   |   |   |
|------------------|---------|---|---|---|---|
| hsa-miR-200a-3p  | HOXB5   | 1 | 1 | 1 | 3 |
| hsa-miR-4665-5p  | HOXB5   | 1 | 1 | 1 | 3 |
| hsa-miR-7-5p     | HOXB5   | 1 | 1 | 1 | 3 |
| hsa-miR-182-5p   | HOXA9   | 1 | 1 | 1 | 3 |
| hsa-miR-3662     | HNRNPU  | 1 | 1 | 1 | 3 |
| hsa-miR-577      | HNRNPU  | 1 | 1 | 1 | 3 |
| hsa-miR-141-3p   | HNRNPF  | 1 | 1 | 1 | 3 |
| hsa-miR-155-3p   | HNRNPF  | 1 | 1 | 1 | 3 |
| hsa-miR-200a-3p  | HNRNPF  | 1 | 1 | 1 | 3 |
| hsa-miR-183-3p   | HNRNPC  | 1 | 1 | 1 | 3 |
| hsa-miR-4665-5p  | HNRNPAB | 1 | 1 | 1 | 3 |
| hsa-miR-211-5p   | HNRNPA2 | 1 | 1 | 1 | 3 |
| hsa-miR-6877-5p  | HNRNPA0 | 1 | 1 | 1 | 3 |
| hsa-miR-449a     | HNF4A   | 1 | 1 | 1 | 3 |
| hsa-miR-6891-5p  | HMGXB3  | 1 | 1 | 1 | 3 |
| hsa-miR-7-5p     | HMGXN4  | 1 | 1 | 1 | 3 |
| hsa-miR-548y     | HMGXN2  | 1 | 1 | 1 | 3 |
| hsa-miR-548j-5p  | HMGXN2  | 1 | 1 | 1 | 3 |
| hsa-miR-18a-5p   | HMGCS1  | 1 | 1 | 1 | 3 |
| hsa-miR-106a-5p  | HMGB3   | 1 | 1 | 1 | 3 |
| hsa-miR-20b-5p   | HMGB3   | 1 | 1 | 1 | 3 |
| hsa-miR-3150b-3p | HMGB3   | 1 | 1 | 1 | 3 |
| hsa-miR-891b     | HMGB1   | 1 | 1 | 1 | 3 |
| hsa-miR-4758-3p  | HMGA1   | 1 | 1 | 1 | 3 |
| hsa-miR-548j-5p  | HMBOX1  | 1 | 1 | 1 | 3 |
| hsa-miR-548y     | HMBOX1  | 1 | 1 | 1 | 3 |
| hsa-miR-20b-5p   | HMBOX1  | 1 | 1 | 1 | 3 |
| hsa-miR-106a-5p  | HMBOX1  | 1 | 1 | 1 | 3 |
| hsa-miR-18a-3p   | HM13    | 1 | 1 | 1 | 3 |
| hsa-miR-130b-3p  | HIVEP2  | 1 | 1 | 1 | 3 |
| hsa-miR-5684     | HIVEP2  | 1 | 1 | 1 | 3 |
| hsa-miR-363-3p   | HIVEP1  | 1 | 1 | 1 | 3 |
| hsa-miR-3065-5p  | HIPK1   | 1 | 1 | 1 | 3 |
| hsa-miR-512-3p   | HIP1    | 1 | 1 | 1 | 3 |
| hsa-miR-31-5p    | HIF1AN  | 1 | 1 | 1 | 3 |
| hsa-miR-20b-5p   | HIF1A   | 1 | 1 | 1 | 3 |
| hsa-miR-18b-5p   | HIF1A   | 1 | 1 | 1 | 3 |
| hsa-miR-6815-3p  | HIF1A   | 1 | 1 | 1 | 3 |
| hsa-miR-3662     | HIF1A   | 1 | 1 | 1 | 3 |
| hsa-miR-106a-3p  | HIF1A   | 1 | 1 | 1 | 3 |
| hsa-miR-18a-5p   | HIF1A   | 1 | 1 | 1 | 3 |
| hsa-miR-363-5p   | HIC2    | 1 | 1 | 1 | 3 |
| hsa-miR-6777-5p  | HIC1    | 1 | 1 | 1 | 3 |
| hsa-miR-1248     | HHLA2   | 1 | 1 | 1 | 3 |
| hsa-miR-526b-5p  | HHIP    | 1 | 1 | 1 | 3 |
| hsa-miR-7-5p     | HELLS   | 1 | 1 | 1 | 3 |
| hsa-miR-130b-3p  | HEG1    | 1 | 1 | 1 | 3 |
| hsa-miR-122-5p   | HECW2   | 1 | 1 | 1 | 3 |
| hsa-miR-122-5p   | HECTD3  | 1 | 1 | 1 | 3 |
| hsa-miR-636      | HECTD2  | 1 | 1 | 1 | 3 |
| hsa-miR-20b-3p   | HECTD1  | 1 | 1 | 1 | 3 |
| hsa-miR-20b-3p   | HDHD2   | 1 | 1 | 1 | 3 |
| hsa-miR-940      | HDGFRP2 | 1 | 1 | 1 | 3 |
| hsa-miR-548d-3p  | HDGFRP2 | 1 | 1 | 1 | 3 |
| hsa-miR-3619-5p  | HDGF    | 1 | 1 | 1 | 3 |
| hsa-miR-449b-3p  | HCFC2   | 1 | 1 | 1 | 3 |
| hsa-miR-211-5p   | HCAR2   | 1 | 1 | 1 | 3 |
| hsa-miR-6844     | HBS1L   | 1 | 1 | 1 | 3 |

|                 |          |   |   |   |   |
|-----------------|----------|---|---|---|---|
| hsa-miR-301b-3p | HBP1     | 1 | 1 | 1 | 3 |
| hsa-miR-106a-5p | HBP1     | 1 | 1 | 1 | 3 |
| hsa-miR-130b-3p | HBP1     | 1 | 1 | 1 | 3 |
| hsa-miR-20b-5p  | HBP1     | 1 | 1 | 1 | 3 |
| hsa-miR-20b-5p  | HAUS8    | 1 | 1 | 1 | 3 |
| hsa-miR-106a-5p | HAUS8    | 1 | 1 | 1 | 3 |
| hsa-miR-20b-5p  | HAS2     | 1 | 1 | 1 | 3 |
| hsa-miR-106a-5p | HAS2     | 1 | 1 | 1 | 3 |
| hsa-miR-130b-3p | HABP4    | 1 | 1 | 1 | 3 |
| hsa-miR-301b-3p | HABP4    | 1 | 1 | 1 | 3 |
| hsa-miR-3614-5p | H3F3B    | 1 | 1 | 1 | 3 |
| hsa-miR-141-3p  | H2AFZ    | 1 | 1 | 1 | 3 |
| hsa-miR-200a-3p | H2AFZ    | 1 | 1 | 1 | 3 |
| hsa-miR-122-5p  | GYS1     | 1 | 1 | 1 | 3 |
| hsa-miR-577     | GXYLT2   | 1 | 1 | 1 | 3 |
| hsa-miR-9-3p    | GXYLT1   | 1 | 1 | 1 | 3 |
| hsa-miR-18a-3p  | GTPBP10  | 1 | 1 | 1 | 3 |
| hsa-miR-489-3p  | GTF3C4   | 1 | 1 | 1 | 3 |
| hsa-miR-512-3p  | GTF2H3   | 1 | 1 | 1 | 3 |
| hsa-miR-891b    | GTF2H1   | 1 | 1 | 1 | 3 |
| hsa-miR-31-5p   | GTF2E1   | 1 | 1 | 1 | 3 |
| hsa-miR-363-3p  | GTF2A1   | 1 | 1 | 1 | 3 |
| hsa-miR-5684    | GTF2A1   | 1 | 1 | 1 | 3 |
| hsa-miR-155-3p  | GTDC1    | 1 | 1 | 1 | 3 |
| hsa-miR-15b-3p  | GTDC1    | 1 | 1 | 1 | 3 |
| hsa-miR-1910-5p | GSK3B    | 1 | 1 | 1 | 3 |
| hsa-miR-548d-3p | GRPEL2   | 1 | 1 | 1 | 3 |
| hsa-miR-548j-5p | GRM5     | 1 | 1 | 1 | 3 |
| hsa-miR-548y    | GRM5     | 1 | 1 | 1 | 3 |
| hsa-miR-200a-3p | GRB2     | 1 | 1 | 1 | 3 |
| hsa-miR-3934-5p | GRB2     | 1 | 1 | 1 | 3 |
| hsa-miR-130b-3p | GRB10    | 1 | 1 | 1 | 3 |
| hsa-miR-301b-3p | GRB10    | 1 | 1 | 1 | 3 |
| hsa-miR-877-3p  | GRAMD1B  | 1 | 1 | 1 | 3 |
| hsa-miR-93-3p   | GPR89B   | 1 | 1 | 1 | 3 |
| hsa-miR-1226-3p | GPR26    | 1 | 1 | 1 | 3 |
| hsa-miR-449a    | GPR156   | 1 | 1 | 1 | 3 |
| hsa-miR-431-5p  | GPR155   | 1 | 1 | 1 | 3 |
| hsa-miR-3934-3p | GPR155   | 1 | 1 | 1 | 3 |
| hsa-miR-183-3p  | GPR137B  | 1 | 1 | 1 | 3 |
| hsa-miR-210-3p  | GPD1L    | 1 | 1 | 1 | 3 |
| hsa-miR-18a-3p  | GPD1     | 1 | 1 | 1 | 3 |
| hsa-miR-548f-3p | GPC4     | 1 | 1 | 1 | 3 |
| hsa-miR-363-3p  | GPBP1L1  | 1 | 1 | 1 | 3 |
| hsa-miR-1276    | GPBP1    | 1 | 1 | 1 | 3 |
| hsa-miR-130b-3p | GPATCH8  | 1 | 1 | 1 | 3 |
| hsa-miR-200c-3p | GPATCH8  | 1 | 1 | 1 | 3 |
| hsa-miR-200b-3p | GPATCH8  | 1 | 1 | 1 | 3 |
| hsa-miR-429     | GPATCH8  | 1 | 1 | 1 | 3 |
| hsa-miR-629-3p  | GPATCH2L | 1 | 1 | 1 | 3 |
| hsa-miR-106a-3p | GOLPH3   | 1 | 1 | 1 | 3 |
| hsa-miR-363-3p  | GOLGA8J  | 1 | 1 | 1 | 3 |
| hsa-miR-363-3p  | GOLGA8B  | 1 | 1 | 1 | 3 |
| hsa-miR-363-3p  | GOLGA8A  | 1 | 1 | 1 | 3 |
| hsa-miR-363-3p  | GOLGA3   | 1 | 1 | 1 | 3 |
| hsa-miR-512-3p  | GOLGA2   | 1 | 1 | 1 | 3 |
| hsa-miR-20b-5p  | GOLGA1   | 1 | 1 | 1 | 3 |
| hsa-miR-20b-5p  | GNS      | 1 | 1 | 1 | 3 |

|                  |          |   |   |   |   |
|------------------|----------|---|---|---|---|
| hsa-miR-106a-5p  | GNS      | 1 | 1 | 1 | 3 |
| hsa-miR-3664-3p  | GNS      | 1 | 1 | 1 | 3 |
| hsa-miR-122-5p   | GNPDA2   | 1 | 1 | 1 | 3 |
| hsa-miR-1266-5p  | GNL1     | 1 | 1 | 1 | 3 |
| hsa-miR-183-5p   | GNG5     | 1 | 1 | 1 | 3 |
| hsa-miR-363-5p   | GNG4     | 1 | 1 | 1 | 3 |
| hsa-miR-106a-5p  | GNB5     | 1 | 1 | 1 | 3 |
| hsa-miR-20b-5p   | GNB5     | 1 | 1 | 1 | 3 |
| hsa-miR-363-3p   | GNAQ     | 1 | 1 | 1 | 3 |
| hsa-miR-9-3p     | GNAI1    | 1 | 1 | 1 | 3 |
| hsa-miR-200a-3p  | GNA13    | 1 | 1 | 1 | 3 |
| hsa-miR-141-3p   | GNA13    | 1 | 1 | 1 | 3 |
| hsa-miR-130b-3p  | GMFB     | 1 | 1 | 1 | 3 |
| hsa-miR-301b-3p  | GMFB     | 1 | 1 | 1 | 3 |
| hsa-miR-449b-5p  | GMFB     | 1 | 1 | 1 | 3 |
| hsa-miR-6499-3p  | GMFB     | 1 | 1 | 1 | 3 |
| hsa-miR-449a     | GMFB     | 1 | 1 | 1 | 3 |
| hsa-miR-3176     | GMEB1    | 1 | 1 | 1 | 3 |
| hsa-miR-183-5p   | GLUL     | 1 | 1 | 1 | 3 |
| hsa-miR-6728-5p  | GLUL     | 1 | 1 | 1 | 3 |
| hsa-miR-205-3p   | GLO1     | 1 | 1 | 1 | 3 |
| hsa-miR-940      | GLG1     | 1 | 1 | 1 | 3 |
| hsa-miR-636      | GLCE     | 1 | 1 | 1 | 3 |
| hsa-miR-7-5p     | GJC1     | 1 | 1 | 1 | 3 |
| hsa-miR-892a     | GIMAP1   | 1 | 1 | 1 | 3 |
| hsa-miR-20b-5p   | GIGYF1   | 1 | 1 | 1 | 3 |
| hsa-miR-18b-5p   | GIGYF1   | 1 | 1 | 1 | 3 |
| hsa-miR-106a-5p  | GIGYF1   | 1 | 1 | 1 | 3 |
| hsa-miR-18a-5p   | GIGYF1   | 1 | 1 | 1 | 3 |
| hsa-miR-20b-5p   | GID4     | 1 | 1 | 1 | 3 |
| hsa-miR-363-3p   | GID4     | 1 | 1 | 1 | 3 |
| hsa-miR-106a-5p  | GID4     | 1 | 1 | 1 | 3 |
| hsa-miR-940      | GGCX     | 1 | 1 | 1 | 3 |
| hsa-miR-522-3p   | GGA3     | 1 | 1 | 1 | 3 |
| hsa-miR-3150b-3p | GFRAL    | 1 | 1 | 1 | 3 |
| hsa-miR-363-3p   | GFPT2    | 1 | 1 | 1 | 3 |
| hsa-miR-1229-3p  | GFPT1    | 1 | 1 | 1 | 3 |
| hsa-miR-363-3p   | GEMIN2   | 1 | 1 | 1 | 3 |
| hsa-miR-4665-5p  | GDI1     | 1 | 1 | 1 | 3 |
| hsa-miR-1304-3p  | GDE1     | 1 | 1 | 1 | 3 |
| hsa-miR-3662     | GDAP2    | 1 | 1 | 1 | 3 |
| hsa-miR-6781-3p  | GCNT1    | 1 | 1 | 1 | 3 |
| hsa-miR-20b-5p   | GBF1     | 1 | 1 | 1 | 3 |
| hsa-miR-1266-5p  | GBA2     | 1 | 1 | 1 | 3 |
| hsa-miR-3934-3p  | GBA2     | 1 | 1 | 1 | 3 |
| hsa-miR-200c-3p  | GATA4    | 1 | 1 | 1 | 3 |
| hsa-miR-200b-3p  | GATA4    | 1 | 1 | 1 | 3 |
| hsa-miR-527      | GAS7     | 1 | 1 | 1 | 3 |
| hsa-miR-518a-5p  | GAS7     | 1 | 1 | 1 | 3 |
| hsa-miR-3614-5p  | GAP43    | 1 | 1 | 1 | 3 |
| hsa-miR-3662     | GAN      | 1 | 1 | 1 | 3 |
| hsa-miR-203b-3p  | GAN      | 1 | 1 | 1 | 3 |
| hsa-miR-363-3p   | GALNT7   | 1 | 1 | 1 | 3 |
| hsa-miR-122-5p   | GALNT3   | 1 | 1 | 1 | 3 |
| hsa-miR-7-5p     | GALNT3   | 1 | 1 | 1 | 3 |
| hsa-miR-636      | GALNT1   | 1 | 1 | 1 | 3 |
| hsa-miR-629-3p   | GABARAPI | 1 | 1 | 1 | 3 |
| hsa-miR-3619-5p  | GABARAP  | 1 | 1 | 1 | 3 |

|                   |         |   |   |   |   |
|-------------------|---------|---|---|---|---|
| hsa-miR-20b-5p    | GAB1    | 1 | 1 | 1 | 3 |
| hsa-miR-122-5p    | G6PC3   | 1 | 1 | 1 | 3 |
| hsa-miR-556-3p    | G3BP2   | 1 | 1 | 1 | 3 |
| hsa-miR-219a-2-3p | G3BP2   | 1 | 1 | 1 | 3 |
| hsa-miR-888-5p    | G3BP2   | 1 | 1 | 1 | 3 |
| hsa-miR-577       | G3BP1   | 1 | 1 | 1 | 3 |
| hsa-miR-548d-3p   | G2E3    | 1 | 1 | 1 | 3 |
| hsa-miR-891b      | FZD6    | 1 | 1 | 1 | 3 |
| hsa-miR-130b-3p   | FZD6    | 1 | 1 | 1 | 3 |
| hsa-miR-301b-3p   | FZD6    | 1 | 1 | 1 | 3 |
| hsa-miR-527       | FZD5    | 1 | 1 | 1 | 3 |
| hsa-miR-3065-5p   | FZD5    | 1 | 1 | 1 | 3 |
| hsa-miR-216b-5p   | FZD5    | 1 | 1 | 1 | 3 |
| hsa-miR-518a-5p   | FZD5    | 1 | 1 | 1 | 3 |
| hsa-miR-31-5p     | FZD3    | 1 | 1 | 1 | 3 |
| hsa-miR-934       | FZD2    | 1 | 1 | 1 | 3 |
| hsa-miR-20b-5p    | FYCO1   | 1 | 1 | 1 | 3 |
| hsa-miR-3662      | FXN     | 1 | 1 | 1 | 3 |
| hsa-miR-122-5p    | FUNDC2  | 1 | 1 | 1 | 3 |
| hsa-miR-31-3p     | FRS2    | 1 | 1 | 1 | 3 |
| hsa-miR-96-5p     | FRS2    | 1 | 1 | 1 | 3 |
| hsa-miR-106a-5p   | FRS2    | 1 | 1 | 1 | 3 |
| hsa-miR-20b-5p    | FRS2    | 1 | 1 | 1 | 3 |
| hsa-miR-20b-5p    | FRMD6   | 1 | 1 | 1 | 3 |
| hsa-miR-6499-3p   | FRK     | 1 | 1 | 1 | 3 |
| hsa-miR-20b-5p    | FOXQ1   | 1 | 1 | 1 | 3 |
| hsa-miR-106a-5p   | FOXQ1   | 1 | 1 | 1 | 3 |
| hsa-miR-9-5p      | FOXP1   | 1 | 1 | 1 | 3 |
| hsa-miR-182-5p    | FOXO3   | 1 | 1 | 1 | 3 |
| hsa-miR-96-5p     | FOXO1   | 1 | 1 | 1 | 3 |
| hsa-miR-6715a-3p  | FOXO1   | 1 | 1 | 1 | 3 |
| hsa-miR-183-5p    | FOXO1   | 1 | 1 | 1 | 3 |
| hsa-miR-3614-5p   | FOXN3   | 1 | 1 | 1 | 3 |
| hsa-miR-183-5p    | FOXN2   | 1 | 1 | 1 | 3 |
| hsa-miR-4724-5p   | FOXN2   | 1 | 1 | 1 | 3 |
| hsa-miR-363-3p    | FOXN2   | 1 | 1 | 1 | 3 |
| hsa-miR-141-5p    | FOXL2   | 1 | 1 | 1 | 3 |
| hsa-miR-20b-5p    | FOXJ3   | 1 | 1 | 1 | 3 |
| hsa-miR-106a-5p   | FOXJ3   | 1 | 1 | 1 | 3 |
| hsa-miR-425-5p    | FOXJ3   | 1 | 1 | 1 | 3 |
| hsa-miR-20b-5p    | FOXJ2   | 1 | 1 | 1 | 3 |
| hsa-miR-106a-5p   | FOXJ2   | 1 | 1 | 1 | 3 |
| hsa-miR-182-5p    | FOXF2   | 1 | 1 | 1 | 3 |
| hsa-miR-31-5p     | FOXD4L5 | 1 | 1 | 1 | 3 |
| hsa-miR-31-5p     | FOXD4L4 | 1 | 1 | 1 | 3 |
| hsa-miR-31-5p     | FOXD4L1 | 1 | 1 | 1 | 3 |
| hsa-miR-31-5p     | FOXD4   | 1 | 1 | 1 | 3 |
| hsa-miR-211-5p    | FOXC1   | 1 | 1 | 1 | 3 |
| hsa-miR-200a-5p   | FOXC1   | 1 | 1 | 1 | 3 |
| hsa-miR-363-3p    | FNIP1   | 1 | 1 | 1 | 3 |
| hsa-miR-7-5p      | FNDC4   | 1 | 1 | 1 | 3 |
| hsa-miR-20b-5p    | FNBP1L  | 1 | 1 | 1 | 3 |
| hsa-miR-106a-5p   | FNBP1L  | 1 | 1 | 1 | 3 |
| hsa-miR-9-5p      | FNBP1   | 1 | 1 | 1 | 3 |
| hsa-miR-200b-3p   | FN1     | 1 | 1 | 1 | 3 |
| hsa-miR-200c-3p   | FN1     | 1 | 1 | 1 | 3 |
| hsa-miR-130b-3p   | FMR1    | 1 | 1 | 1 | 3 |
| hsa-miR-200b-3p   | FLT1    | 1 | 1 | 1 | 3 |

|                  |         |   |   |   |   |
|------------------|---------|---|---|---|---|
| hsa-miR-200c-3p  | FLT1    | 1 | 1 | 1 | 3 |
| hsa-miR-3619-5p  | FLOT2   | 1 | 1 | 1 | 3 |
| hsa-miR-182-5p   | FLOT1   | 1 | 1 | 1 | 3 |
| hsa-miR-6499-3p  | FKBP5   | 1 | 1 | 1 | 3 |
| hsa-miR-577      | FKBP1A  | 1 | 1 | 1 | 3 |
| hsa-miR-7974     | FKBP15  | 1 | 1 | 1 | 3 |
| hsa-miR-577      | FKBP14  | 1 | 1 | 1 | 3 |
| hsa-miR-20b-5p   | FJX1    | 1 | 1 | 1 | 3 |
| hsa-miR-106a-5p  | FJX1    | 1 | 1 | 1 | 3 |
| hsa-miR-548f-3p  | FJX1    | 1 | 1 | 1 | 3 |
| hsa-miR-210-3p   | FGFRL1  | 1 | 1 | 1 | 3 |
| hsa-miR-182-5p   | FGF9    | 1 | 1 | 1 | 3 |
| hsa-miR-526b-5p  | FGD4    | 1 | 1 | 1 | 3 |
| hsa-miR-138-5p   | FERMT2  | 1 | 1 | 1 | 3 |
| hsa-miR-522-3p   | FEM1C   | 1 | 1 | 1 | 3 |
| hsa-miR-512-3p   | FEM1C   | 1 | 1 | 1 | 3 |
| hsa-miR-20b-5p   | FEM1C   | 1 | 1 | 1 | 3 |
| hsa-miR-106a-5p  | FEM1C   | 1 | 1 | 1 | 3 |
| hsa-miR-3662     | FEM1C   | 1 | 1 | 1 | 3 |
| hsa-miR-20b-3p   | FEM1C   | 1 | 1 | 1 | 3 |
| hsa-miR-489-3p   | FEM1B   | 1 | 1 | 1 | 3 |
| hsa-miR-6499-3p  | FEM1B   | 1 | 1 | 1 | 3 |
| hsa-miR-20b-5p   | FCHO2   | 1 | 1 | 1 | 3 |
| hsa-miR-106a-5p  | FCHO2   | 1 | 1 | 1 | 3 |
| hsa-miR-1304-3p  | FBXW8   | 1 | 1 | 1 | 3 |
| hsa-miR-182-5p   | FBXW7   | 1 | 1 | 1 | 3 |
| hsa-miR-20b-5p   | FBXO48  | 1 | 1 | 1 | 3 |
| hsa-miR-20b-5p   | FBXO31  | 1 | 1 | 1 | 3 |
| hsa-miR-301b-3p  | FBXO28  | 1 | 1 | 1 | 3 |
| hsa-miR-9-3p     | FBXO28  | 1 | 1 | 1 | 3 |
| hsa-miR-130b-3p  | FBXO28  | 1 | 1 | 1 | 3 |
| hsa-miR-20b-5p   | FBXO21  | 1 | 1 | 1 | 3 |
| hsa-miR-106a-5p  | FBXL5   | 1 | 1 | 1 | 3 |
| hsa-miR-20b-5p   | FBXL5   | 1 | 1 | 1 | 3 |
| hsa-miR-767-3p   | FBXL5   | 1 | 1 | 1 | 3 |
| hsa-miR-18b-5p   | FBXL3   | 1 | 1 | 1 | 3 |
| hsa-miR-18a-5p   | FBXL3   | 1 | 1 | 1 | 3 |
| hsa-miR-9-5p     | FBN2    | 1 | 1 | 1 | 3 |
| hsa-miR-767-5p   | FBN1    | 1 | 1 | 1 | 3 |
| hsa-miR-548d-3p  | FBLN2   | 1 | 1 | 1 | 3 |
| hsa-miR-130b-3p  | FAT3    | 1 | 1 | 1 | 3 |
| hsa-miR-363-3p   | FASLG   | 1 | 1 | 1 | 3 |
| hsa-miR-3150b-3p | FAM53C  | 1 | 1 | 1 | 3 |
| hsa-miR-548j-5p  | FAM53C  | 1 | 1 | 1 | 3 |
| hsa-miR-548y     | FAM53C  | 1 | 1 | 1 | 3 |
| hsa-miR-3619-5p  | FAM49B  | 1 | 1 | 1 | 3 |
| hsa-miR-20b-5p   | FAM46C  | 1 | 1 | 1 | 3 |
| hsa-miR-9-5p     | FAM46A  | 1 | 1 | 1 | 3 |
| hsa-miR-18b-5p   | FAM3C   | 1 | 1 | 1 | 3 |
| hsa-miR-18a-5p   | FAM3C   | 1 | 1 | 1 | 3 |
| hsa-miR-629-3p   | FAM229B | 1 | 1 | 1 | 3 |
| hsa-miR-183-5p   | FAM217B | 1 | 1 | 1 | 3 |
| hsa-miR-106a-5p  | FAM210A | 1 | 1 | 1 | 3 |
| hsa-miR-20b-5p   | FAM210A | 1 | 1 | 1 | 3 |
| hsa-miR-636      | FAM198B | 1 | 1 | 1 | 3 |
| hsa-miR-629-3p   | FAM175B | 1 | 1 | 1 | 3 |
| hsa-miR-183-5p   | FAM175B | 1 | 1 | 1 | 3 |
| hsa-miR-1226-3p  | FAM168B | 1 | 1 | 1 | 3 |

|                 |          |   |   |   |   |
|-----------------|----------|---|---|---|---|
| hsa-miR-6891-5p | FAM168A  | 1 | 1 | 1 | 3 |
| hsa-miR-548y    | FAM135A  | 1 | 1 | 1 | 3 |
| hsa-miR-548j-5p | FAM135A  | 1 | 1 | 1 | 3 |
| hsa-miR-940     | FAM131B  | 1 | 1 | 1 | 3 |
| hsa-miR-106a-5p | FAM129A  | 1 | 1 | 1 | 3 |
| hsa-miR-20b-5p  | FAM129A  | 1 | 1 | 1 | 3 |
| hsa-miR-106a-5p | FAM126B  | 1 | 1 | 1 | 3 |
| hsa-miR-20b-5p  | FAM126B  | 1 | 1 | 1 | 3 |
| hsa-miR-7-5p    | FAM126B  | 1 | 1 | 1 | 3 |
| hsa-miR-122-5p  | FAM117B  | 1 | 1 | 1 | 3 |
| hsa-miR-489-3p  | FAM117B  | 1 | 1 | 1 | 3 |
| hsa-miR-20b-5p  | FAM117B  | 1 | 1 | 1 | 3 |
| hsa-miR-3664-3p | FAM109B  | 1 | 1 | 1 | 3 |
| hsa-miR-636     | FAM102B  | 1 | 1 | 1 | 3 |
| hsa-miR-20b-5p  | FAM102A  | 1 | 1 | 1 | 3 |
| hsa-miR-106a-5p | F3       | 1 | 1 | 1 | 3 |
| hsa-miR-20b-5p  | F3       | 1 | 1 | 1 | 3 |
| hsa-miR-18a-5p  | F3       | 1 | 1 | 1 | 3 |
| hsa-miR-18b-5p  | F3       | 1 | 1 | 1 | 3 |
| hsa-miR-512-3p  | F2RL3    | 1 | 1 | 1 | 3 |
| hsa-miR-205-5p  | EZR      | 1 | 1 | 1 | 3 |
| hsa-miR-183-5p  | EZR      | 1 | 1 | 1 | 3 |
| hsa-miR-138-5p  | EZH2     | 1 | 1 | 1 | 3 |
| hsa-miR-20b-5p  | EZH1     | 1 | 1 | 1 | 3 |
| hsa-miR-7-5p    | EXOSC2   | 1 | 1 | 1 | 3 |
| hsa-miR-363-3p  | EXOC5    | 1 | 1 | 1 | 3 |
| hsa-miR-6499-3p | EVI5L    | 1 | 1 | 1 | 3 |
| hsa-miR-449b-5p | EVI5L    | 1 | 1 | 1 | 3 |
| hsa-miR-449a    | EVI5L    | 1 | 1 | 1 | 3 |
| hsa-miR-182-5p  | EVI5     | 1 | 1 | 1 | 3 |
| hsa-miR-940     | EVC      | 1 | 1 | 1 | 3 |
| hsa-miR-3662    | ETS2     | 1 | 1 | 1 | 3 |
| hsa-miR-200b-3p | ETS1     | 1 | 1 | 1 | 3 |
| hsa-miR-200c-3p | ETS1     | 1 | 1 | 1 | 3 |
| hsa-miR-205-3p  | ETNK1    | 1 | 1 | 1 | 3 |
| hsa-miR-548y    | ETNK1    | 1 | 1 | 1 | 3 |
| hsa-miR-205-5p  | ETNK1    | 1 | 1 | 1 | 3 |
| hsa-miR-548j-5p | ETNK1    | 1 | 1 | 1 | 3 |
| hsa-miR-205-5p  | ESRRG    | 1 | 1 | 1 | 3 |
| hsa-miR-512-3p  | ESRP2    | 1 | 1 | 1 | 3 |
| hsa-miR-18a-5p  | ESR1     | 1 | 1 | 1 | 3 |
| hsa-miR-301b-3p | ESR1     | 1 | 1 | 1 | 3 |
| hsa-miR-130b-3p | ESR1     | 1 | 1 | 1 | 3 |
| hsa-miR-18b-5p  | ESR1     | 1 | 1 | 1 | 3 |
| hsa-miR-200c-3p | ERRFI1   | 1 | 1 | 1 | 3 |
| hsa-miR-892a    | ERMP1    | 1 | 1 | 1 | 3 |
| hsa-miR-200c-3p | ERMP1    | 1 | 1 | 1 | 3 |
| hsa-miR-429     | ERMP1    | 1 | 1 | 1 | 3 |
| hsa-miR-7-5p    | ERI2     | 1 | 1 | 1 | 3 |
| hsa-miR-203b-3p | ERI2     | 1 | 1 | 1 | 3 |
| hsa-miR-363-3p  | ERGIC2   | 1 | 1 | 1 | 3 |
| hsa-miR-6499-3p | ERGIC1   | 1 | 1 | 1 | 3 |
| hsa-miR-3619-5p | ERC1     | 1 | 1 | 1 | 3 |
| hsa-miR-592     | ERBB3    | 1 | 1 | 1 | 3 |
| hsa-miR-940     | EPM2AIP1 | 1 | 1 | 1 | 3 |
| hsa-miR-526b-5p | EPHB1    | 1 | 1 | 1 | 3 |
| hsa-miR-141-3p  | EPHA7    | 1 | 1 | 1 | 3 |
| hsa-miR-200a-3p | EPHA7    | 1 | 1 | 1 | 3 |

|                  |          |   |   |   |   |
|------------------|----------|---|---|---|---|
| hsa-miR-20b-5p   | EPHA4    | 1 | 1 | 1 | 3 |
| hsa-miR-106a-5p  | EPHA4    | 1 | 1 | 1 | 3 |
| hsa-miR-141-3p   | EPHA2    | 1 | 1 | 1 | 3 |
| hsa-miR-200a-3p  | EPHA2    | 1 | 1 | 1 | 3 |
| hsa-miR-3662     | EPC2     | 1 | 1 | 1 | 3 |
| hsa-miR-3662     | EPB41L4B | 1 | 1 | 1 | 3 |
| hsa-miR-31-3p    | EPB41L4B | 1 | 1 | 1 | 3 |
| hsa-miR-301b-3p  | EOGT     | 1 | 1 | 1 | 3 |
| hsa-miR-425-5p   | EOGT     | 1 | 1 | 1 | 3 |
| hsa-miR-20b-5p   | ENPP5    | 1 | 1 | 1 | 3 |
| hsa-miR-130b-3p  | ENPP5    | 1 | 1 | 1 | 3 |
| hsa-miR-301b-3p  | ENPP5    | 1 | 1 | 1 | 3 |
| hsa-miR-527      | ENPP5    | 1 | 1 | 1 | 3 |
| hsa-miR-518a-5p  | ENPP5    | 1 | 1 | 1 | 3 |
| hsa-miR-106a-5p  | ENPP5    | 1 | 1 | 1 | 3 |
| hsa-miR-130b-3p  | ENPP4    | 1 | 1 | 1 | 3 |
| hsa-miR-205-5p   | ENPP4    | 1 | 1 | 1 | 3 |
| hsa-miR-301b-3p  | ENPP4    | 1 | 1 | 1 | 3 |
| hsa-miR-767-5p   | ENPP2    | 1 | 1 | 1 | 3 |
| hsa-miR-6891-5p  | EN2      | 1 | 1 | 1 | 3 |
| hsa-miR-3664-3p  | ELP3     | 1 | 1 | 1 | 3 |
| hsa-miR-211-5p   | ELOVL6   | 1 | 1 | 1 | 3 |
| hsa-miR-3161     | ELOVL5   | 1 | 1 | 1 | 3 |
| hsa-miR-3934-5p  | ELOVL1   | 1 | 1 | 1 | 3 |
| hsa-miR-767-5p   | ELMSAN1  | 1 | 1 | 1 | 3 |
| hsa-miR-106a-5p  | ELK4     | 1 | 1 | 1 | 3 |
| hsa-miR-6715a-3p | ELK4     | 1 | 1 | 1 | 3 |
| hsa-miR-20b-5p   | ELK4     | 1 | 1 | 1 | 3 |
| hsa-miR-141-3p   | ELAVL4   | 1 | 1 | 1 | 3 |
| hsa-miR-141-3p   | ELAVL2   | 1 | 1 | 1 | 3 |
| hsa-miR-20b-5p   | ELAVL2   | 1 | 1 | 1 | 3 |
| hsa-miR-200a-3p  | ELAVL2   | 1 | 1 | 1 | 3 |
| hsa-miR-106a-5p  | ELAVL2   | 1 | 1 | 1 | 3 |
| hsa-miR-200c-3p  | ELAVL2   | 1 | 1 | 1 | 3 |
| hsa-miR-522-3p   | ELAVL1   | 1 | 1 | 1 | 3 |
| hsa-miR-9-5p     | ELAVL1   | 1 | 1 | 1 | 3 |
| hsa-miR-20b-5p   | EIF5A2   | 1 | 1 | 1 | 3 |
| hsa-miR-7-5p     | EIF5A2   | 1 | 1 | 1 | 3 |
| hsa-miR-3662     | EIF5A2   | 1 | 1 | 1 | 3 |
| hsa-miR-106a-5p  | EIF4H    | 1 | 1 | 1 | 3 |
| hsa-miR-20b-5p   | EIF4H    | 1 | 1 | 1 | 3 |
| hsa-miR-1229-3p  | EIF4G2   | 1 | 1 | 1 | 3 |
| hsa-miR-106a-5p  | EIF4G2   | 1 | 1 | 1 | 3 |
| hsa-miR-96-5p    | EIF4EBP2 | 1 | 1 | 1 | 3 |
| hsa-miR-6891-5p  | EIF4EBP1 | 1 | 1 | 1 | 3 |
| hsa-miR-7-5p     | EIF4E    | 1 | 1 | 1 | 3 |
| hsa-miR-877-3p   | EIF4A3   | 1 | 1 | 1 | 3 |
| hsa-miR-7-5p     | EIF2S3   | 1 | 1 | 1 | 3 |
| hsa-miR-877-3p   | EIF2B2   | 1 | 1 | 1 | 3 |
| hsa-miR-877-5p   | EIF1AX   | 1 | 1 | 1 | 3 |
| hsa-miR-3065-5p  | EIF1AX   | 1 | 1 | 1 | 3 |
| hsa-miR-888-5p   | EIF1AX   | 1 | 1 | 1 | 3 |
| hsa-miR-138-5p   | EID1     | 1 | 1 | 1 | 3 |
| hsa-miR-20b-5p   | EGLN3    | 1 | 1 | 1 | 3 |
| hsa-miR-106a-5p  | EGLN3    | 1 | 1 | 1 | 3 |
| hsa-miR-130b-3p  | EGLN3    | 1 | 1 | 1 | 3 |
| hsa-miR-301b-3p  | EGLN3    | 1 | 1 | 1 | 3 |
| hsa-miR-7-5p     | EGFR     | 1 | 1 | 1 | 3 |

|                 |          |   |   |   |   |
|-----------------|----------|---|---|---|---|
| hsa-miR-3189-3p | EFTUD2   | 1 | 1 | 1 | 3 |
| hsa-miR-7702    | EFNA3    | 1 | 1 | 1 | 3 |
| hsa-miR-940     | EFNA1    | 1 | 1 | 1 | 3 |
| hsa-miR-200c-3p | EFNA1    | 1 | 1 | 1 | 3 |
| hsa-miR-5001-3p | EFCAB14  | 1 | 1 | 1 | 3 |
| hsa-miR-20b-5p  | EFCAB14  | 1 | 1 | 1 | 3 |
| hsa-miR-1301-3p | EFCAB14  | 1 | 1 | 1 | 3 |
| hsa-miR-106a-5p | EFCAB14  | 1 | 1 | 1 | 3 |
| hsa-miR-20b-5p  | EEA1     | 1 | 1 | 1 | 3 |
| hsa-miR-130b-3p | EDN1     | 1 | 1 | 1 | 3 |
| hsa-miR-301b-3p | EDN1     | 1 | 1 | 1 | 3 |
| hsa-miR-548d-3p | EDIL3    | 1 | 1 | 1 | 3 |
| hsa-miR-9-5p    | EDEM3    | 1 | 1 | 1 | 3 |
| hsa-miR-6815-3p | EDEM3    | 1 | 1 | 1 | 3 |
| hsa-miR-1304-3p | EDEM3    | 1 | 1 | 1 | 3 |
| hsa-miR-1301-3p | EDEM1    | 1 | 1 | 1 | 3 |
| hsa-miR-888-5p  | EDEM1    | 1 | 1 | 1 | 3 |
| hsa-miR-96-5p   | EDEM1    | 1 | 1 | 1 | 3 |
| hsa-miR-363-3p  | EDEM1    | 1 | 1 | 1 | 3 |
| hsa-miR-31-5p   | ECHDC1   | 1 | 1 | 1 | 3 |
| hsa-miR-6844    | EBNA1BP2 | 1 | 1 | 1 | 3 |
| hsa-miR-130b-5p | EBF4     | 1 | 1 | 1 | 3 |
| hsa-miR-20b-5p  | E2F5     | 1 | 1 | 1 | 3 |
| hsa-miR-141-3p  | E2F3     | 1 | 1 | 1 | 3 |
| hsa-miR-20b-5p  | E2F2     | 1 | 1 | 1 | 3 |
| hsa-miR-3127-3p | E2F2     | 1 | 1 | 1 | 3 |
| hsa-miR-106a-5p | E2F1     | 1 | 1 | 1 | 3 |
| hsa-miR-20b-5p  | E2F1     | 1 | 1 | 1 | 3 |
| hsa-miR-6781-3p | DZIP1L   | 1 | 1 | 1 | 3 |
| hsa-miR-215-5p  | DYRK1A   | 1 | 1 | 1 | 3 |
| hsa-miR-522-3p  | DYRK1A   | 1 | 1 | 1 | 3 |
| hsa-miR-205-3p  | DYNLT1   | 1 | 1 | 1 | 3 |
| hsa-miR-130b-3p | DYNLL2   | 1 | 1 | 1 | 3 |
| hsa-miR-629-3p  | DYNLL2   | 1 | 1 | 1 | 3 |
| hsa-miR-106a-5p | DYNC1LI2 | 1 | 1 | 1 | 3 |
| hsa-miR-548f-3p | DYNC1LI2 | 1 | 1 | 1 | 3 |
| hsa-miR-301b-3p | DYNC1LI2 | 1 | 1 | 1 | 3 |
| hsa-miR-183-3p  | DYNC1LI2 | 1 | 1 | 1 | 3 |
| hsa-miR-130b-3p | DYNC1LI2 | 1 | 1 | 1 | 3 |
| hsa-miR-20b-5p  | DYNC1LI2 | 1 | 1 | 1 | 3 |
| hsa-miR-363-3p  | DUSP5    | 1 | 1 | 1 | 3 |
| hsa-miR-106a-5p | DUSP2    | 1 | 1 | 1 | 3 |
| hsa-miR-20b-5p  | DUSP2    | 1 | 1 | 1 | 3 |
| hsa-miR-122-5p  | DUSP2    | 1 | 1 | 1 | 3 |
| hsa-miR-200c-3p | DUSP1    | 1 | 1 | 1 | 3 |
| hsa-miR-7-5p    | DTYMK    | 1 | 1 | 1 | 3 |
| hsa-miR-940     | DTX2     | 1 | 1 | 1 | 3 |
| hsa-miR-1304-3p | DSG3     | 1 | 1 | 1 | 3 |
| hsa-miR-3074-5p | DSE      | 1 | 1 | 1 | 3 |
| hsa-miR-301b-3p | DPYSL2   | 1 | 1 | 1 | 3 |
| hsa-miR-106a-5p | DPYSL2   | 1 | 1 | 1 | 3 |
| hsa-miR-130b-3p | DPYSL2   | 1 | 1 | 1 | 3 |
| hsa-miR-20b-5p  | DPYSL2   | 1 | 1 | 1 | 3 |
| hsa-miR-1283    | DPY19L4  | 1 | 1 | 1 | 3 |
| hsa-miR-141-3p  | DPY19L1  | 1 | 1 | 1 | 3 |
| hsa-miR-200a-3p | DPY19L1  | 1 | 1 | 1 | 3 |
| hsa-miR-3662    | DPY19L1  | 1 | 1 | 1 | 3 |
| hsa-miR-1276    | DPP6     | 1 | 1 | 1 | 3 |



|                 |         |   |   |   |   |
|-----------------|---------|---|---|---|---|
| hsa-miR-20b-3p  | DONSON  | 1 | 1 | 1 | 3 |
| hsa-miR-200b-3p | DNMT3A  | 1 | 1 | 1 | 3 |
| hsa-miR-200c-3p | DNMT3A  | 1 | 1 | 1 | 3 |
| hsa-miR-7-5p    | DNAJC5  | 1 | 1 | 1 | 3 |
| hsa-miR-20b-5p  | DNAJC27 | 1 | 1 | 1 | 3 |
| hsa-miR-577     | DNAJB9  | 1 | 1 | 1 | 3 |
| hsa-miR-106a-5p | DNAJB9  | 1 | 1 | 1 | 3 |
| hsa-miR-363-3p  | DNAJB9  | 1 | 1 | 1 | 3 |
| hsa-miR-20b-5p  | DNAJB9  | 1 | 1 | 1 | 3 |
| hsa-miR-216b-5p | DNAJB9  | 1 | 1 | 1 | 3 |
| hsa-miR-138-5p  | DNAJB6  | 1 | 1 | 1 | 3 |
| hsa-miR-429     | DNAJB6  | 1 | 1 | 1 | 3 |
| hsa-miR-200c-3p | DNAJB6  | 1 | 1 | 1 | 3 |
| hsa-miR-18a-3p  | DNA2    | 1 | 1 | 1 | 3 |
| hsa-miR-205-5p  | DMXL2   | 1 | 1 | 1 | 3 |
| hsa-miR-138-5p  | DMKN    | 1 | 1 | 1 | 3 |
| hsa-miR-183-3p  | DLX4    | 1 | 1 | 1 | 3 |
| hsa-miR-4665-5p | DLGAP3  | 1 | 1 | 1 | 3 |
| hsa-miR-301b-3p | DLG5    | 1 | 1 | 1 | 3 |
| hsa-miR-130b-3p | DLG5    | 1 | 1 | 1 | 3 |
| hsa-miR-449b-3p | DLG4    | 1 | 1 | 1 | 3 |
| hsa-miR-200c-3p | DLC1    | 1 | 1 | 1 | 3 |
| hsa-miR-877-3p  | DLC1    | 1 | 1 | 1 | 3 |
| hsa-miR-200a-3p | DLC1    | 1 | 1 | 1 | 3 |
| hsa-miR-200b-3p | DLC1    | 1 | 1 | 1 | 3 |
| hsa-miR-4665-5p | DIRAS2  | 1 | 1 | 1 | 3 |
| hsa-miR-548f-3p | DIRAS2  | 1 | 1 | 1 | 3 |
| hsa-miR-130b-5p | DIO2    | 1 | 1 | 1 | 3 |
| hsa-miR-425-5p  | DICER1  | 1 | 1 | 1 | 3 |
| hsa-miR-301b-3p | DICER1  | 1 | 1 | 1 | 3 |
| hsa-miR-130b-3p | DICER1  | 1 | 1 | 1 | 3 |
| hsa-miR-215-5p  | DICER1  | 1 | 1 | 1 | 3 |
| hsa-miR-18a-5p  | DICER1  | 1 | 1 | 1 | 3 |
| hsa-miR-9-5p    | DICER1  | 1 | 1 | 1 | 3 |
| hsa-miR-5001-3p | DFFA    | 1 | 1 | 1 | 3 |
| hsa-miR-301b-3p | DEPDC1  | 1 | 1 | 1 | 3 |
| hsa-miR-4763-5p | DEPDC1  | 1 | 1 | 1 | 3 |
| hsa-miR-130b-3p | DEPDC1  | 1 | 1 | 1 | 3 |
| hsa-miR-3187-3p | DENR    | 1 | 1 | 1 | 3 |
| hsa-miR-210-3p  | DENND6A | 1 | 1 | 1 | 3 |
| hsa-miR-200b-3p | DENND5B | 1 | 1 | 1 | 3 |
| hsa-miR-429     | DENND5B | 1 | 1 | 1 | 3 |
| hsa-miR-20b-5p  | DENND5B | 1 | 1 | 1 | 3 |
| hsa-miR-200c-3p | DENND5B | 1 | 1 | 1 | 3 |
| hsa-miR-1248    | DDX6    | 1 | 1 | 1 | 3 |
| hsa-miR-130b-3p | DDX6    | 1 | 1 | 1 | 3 |
| hsa-miR-215-5p  | DDX50   | 1 | 1 | 1 | 3 |
| hsa-miR-1276    | DDX5    | 1 | 1 | 1 | 3 |
| hsa-miR-205-5p  | DDX5    | 1 | 1 | 1 | 3 |
| hsa-miR-20b-5p  | DDX5    | 1 | 1 | 1 | 3 |
| hsa-miR-363-3p  | DDX3X   | 1 | 1 | 1 | 3 |
| hsa-miR-548f-3p | DDX3X   | 1 | 1 | 1 | 3 |
| hsa-miR-548f-3p | DDX21   | 1 | 1 | 1 | 3 |
| hsa-miR-6891-5p | DDX11   | 1 | 1 | 1 | 3 |
| hsa-miR-1266-5p | DDN     | 1 | 1 | 1 | 3 |
| hsa-miR-3934-3p | DDN     | 1 | 1 | 1 | 3 |
| hsa-miR-3616-5p | DDN     | 1 | 1 | 1 | 3 |
| hsa-miR-548j-5p | DDIT4   | 1 | 1 | 1 | 3 |

|                 |          |   |   |   |   |
|-----------------|----------|---|---|---|---|
| hsa-miR-548y    | DDIT4    | 1 | 1 | 1 | 3 |
| hsa-miR-96-5p   | DDIT3    | 1 | 1 | 1 | 3 |
| hsa-miR-20b-5p  | DDHD1    | 1 | 1 | 1 | 3 |
| hsa-miR-96-5p   | DDAH1    | 1 | 1 | 1 | 3 |
| hsa-miR-4665-5p | DDA1     | 1 | 1 | 1 | 3 |
| hsa-miR-940     | DDA1     | 1 | 1 | 1 | 3 |
| hsa-miR-548d-3p | DCUN1D3  | 1 | 1 | 1 | 3 |
| hsa-miR-3664-5p | DCTN4    | 1 | 1 | 1 | 3 |
| hsa-miR-3614-5p | DCPS     | 1 | 1 | 1 | 3 |
| hsa-miR-3662    | DCK      | 1 | 1 | 1 | 3 |
| hsa-miR-3074-5p | DCK      | 1 | 1 | 1 | 3 |
| hsa-miR-105-5p  | DCC      | 1 | 1 | 1 | 3 |
| hsa-miR-106a-5p | DCBLD2   | 1 | 1 | 1 | 3 |
| hsa-miR-6728-5p | DCAF8    | 1 | 1 | 1 | 3 |
| hsa-miR-93-3p   | DCAF8    | 1 | 1 | 1 | 3 |
| hsa-miR-512-3p  | DAZAP2   | 1 | 1 | 1 | 3 |
| hsa-miR-183-5p  | DAP      | 1 | 1 | 1 | 3 |
| hsa-miR-18a-5p  | DAAM2    | 1 | 1 | 1 | 3 |
| hsa-miR-130b-5p | CYYR1    | 1 | 1 | 1 | 3 |
| hsa-miR-940     | CYP8B1   | 1 | 1 | 1 | 3 |
| hsa-miR-940     | CYP4A11  | 1 | 1 | 1 | 3 |
| hsa-miR-182-5p  | CYLD     | 1 | 1 | 1 | 3 |
| hsa-miR-7705    | CYGB     | 1 | 1 | 1 | 3 |
| hsa-miR-556-5p  | CYBRD1   | 1 | 1 | 1 | 3 |
| hsa-miR-20b-5p  | CYBRD1   | 1 | 1 | 1 | 3 |
| hsa-miR-767-3p  | CYB5R3   | 1 | 1 | 1 | 3 |
| hsa-miR-3074-5p | CXCR5    | 1 | 1 | 1 | 3 |
| hsa-miR-9-5p    | CXCR4    | 1 | 1 | 1 | 3 |
| hsa-miR-130b-3p | CUL3     | 1 | 1 | 1 | 3 |
| hsa-miR-301b-3p | CUL3     | 1 | 1 | 1 | 3 |
| hsa-miR-130b-5p | CUBN     | 1 | 1 | 1 | 3 |
| hsa-miR-93-3p   | CTTNBP2N | 1 | 1 | 1 | 3 |
| hsa-miR-215-5p  | CTNNBIP1 | 1 | 1 | 1 | 3 |
| hsa-miR-183-3p  | CTNNB1   | 1 | 1 | 1 | 3 |
| hsa-miR-18a-3p  | CTIF     | 1 | 1 | 1 | 3 |
| hsa-miR-449a    | CTIF     | 1 | 1 | 1 | 3 |
| hsa-miR-18a-5p  | CTGF     | 1 | 1 | 1 | 3 |
| hsa-miR-18b-5p  | CTGF     | 1 | 1 | 1 | 3 |
| hsa-miR-18b-3p  | CTDSPL2  | 1 | 1 | 1 | 3 |
| hsa-miR-18a-5p  | CTDSPL   | 1 | 1 | 1 | 3 |
| hsa-miR-183-5p  | CTDSPL   | 1 | 1 | 1 | 3 |
| hsa-miR-4724-5p | CTBP2    | 1 | 1 | 1 | 3 |
| hsa-miR-138-5p  | CSRP2    | 1 | 1 | 1 | 3 |
| hsa-miR-130b-3p | CSNK1G1  | 1 | 1 | 1 | 3 |
| hsa-miR-130b-3p | CSF1     | 1 | 1 | 1 | 3 |
| hsa-miR-7705    | CSDE1    | 1 | 1 | 1 | 3 |
| hsa-miR-3619-5p | CS       | 1 | 1 | 1 | 3 |
| hsa-miR-940     | CS       | 1 | 1 | 1 | 3 |
| hsa-miR-20b-5p  | CRY2     | 1 | 1 | 1 | 3 |
| hsa-miR-130b-5p | CRY2     | 1 | 1 | 1 | 3 |
| hsa-miR-7-5p    | CRTAP    | 1 | 1 | 1 | 3 |
| hsa-miR-3934-5p | CRTAP    | 1 | 1 | 1 | 3 |
| hsa-miR-7-5p    | CRLS1    | 1 | 1 | 1 | 3 |
| hsa-miR-3619-5p | CRKL     | 1 | 1 | 1 | 3 |
| hsa-miR-106a-5p | CRK      | 1 | 1 | 1 | 3 |
| hsa-miR-31-3p   | CRK      | 1 | 1 | 1 | 3 |
| hsa-miR-20b-5p  | CRK      | 1 | 1 | 1 | 3 |
| hsa-miR-18b-5p  | CRIM1    | 1 | 1 | 1 | 3 |

|                 |         |   |   |   |   |
|-----------------|---------|---|---|---|---|
| hsa-miR-18a-5p  | CRIM1   | 1 | 1 | 1 | 3 |
| hsa-miR-20b-5p  | CRIM1   | 1 | 1 | 1 | 3 |
| hsa-miR-425-5p  | CREBZF  | 1 | 1 | 1 | 3 |
| hsa-miR-155-3p  | CREBRF  | 1 | 1 | 1 | 3 |
| hsa-miR-449b-3p | CREBRF  | 1 | 1 | 1 | 3 |
| hsa-miR-18b-5p  | CREBL2  | 1 | 1 | 1 | 3 |
| hsa-miR-18a-5p  | CREBL2  | 1 | 1 | 1 | 3 |
| hsa-miR-211-5p  | CREB5   | 1 | 1 | 1 | 3 |
| hsa-miR-6854-5p | CREB3L2 | 1 | 1 | 1 | 3 |
| hsa-miR-20b-5p  | CREB1   | 1 | 1 | 1 | 3 |
| hsa-miR-526b-5p | CREB1   | 1 | 1 | 1 | 3 |
| hsa-miR-106a-5p | CREB1   | 1 | 1 | 1 | 3 |
| hsa-miR-1283    | CPSF6   | 1 | 1 | 1 | 3 |
| hsa-miR-18a-3p  | CPS1    | 1 | 1 | 1 | 3 |
| hsa-miR-940     | CPNE5   | 1 | 1 | 1 | 3 |
| hsa-miR-363-3p  | CPEB3   | 1 | 1 | 1 | 3 |
| hsa-miR-1248    | CPEB2   | 1 | 1 | 1 | 3 |
| hsa-miR-182-3p  | CPA4    | 1 | 1 | 1 | 3 |
| hsa-miR-363-3p  | COX20   | 1 | 1 | 1 | 3 |
| hsa-miR-105-5p  | COPS8   | 1 | 1 | 1 | 3 |
| hsa-miR-7-5p    | COMMD7  | 1 | 1 | 1 | 3 |
| hsa-miR-548j-5p | COMMD3- | 1 | 1 | 1 | 3 |
| hsa-miR-548y    | COMMD3- | 1 | 1 | 1 | 3 |
| hsa-miR-7-5p    | COLEC12 | 1 | 1 | 1 | 3 |
| hsa-miR-767-5p  | COL5A2  | 1 | 1 | 1 | 3 |
| hsa-miR-216b-5p | COL4A4  | 1 | 1 | 1 | 3 |
| hsa-miR-767-5p  | COL4A1  | 1 | 1 | 1 | 3 |
| hsa-miR-767-5p  | COL3A1  | 1 | 1 | 1 | 3 |
| hsa-miR-767-5p  | COL10A1 | 1 | 1 | 1 | 3 |
| hsa-miR-7-5p    | CNOT8   | 1 | 1 | 1 | 3 |
| hsa-miR-20b-5p  | CNOT7   | 1 | 1 | 1 | 3 |
| hsa-miR-483-3p  | CNOT6L  | 1 | 1 | 1 | 3 |
| hsa-miR-3187-3p | CNOT6L  | 1 | 1 | 1 | 3 |
| hsa-miR-20b-5p  | CNOT6L  | 1 | 1 | 1 | 3 |
| hsa-miR-106a-5p | CNOT6L  | 1 | 1 | 1 | 3 |
| hsa-miR-449a    | CNOT4   | 1 | 1 | 1 | 3 |
| hsa-miR-363-5p  | CNNM4   | 1 | 1 | 1 | 3 |
| hsa-miR-363-3p  | CNNM4   | 1 | 1 | 1 | 3 |
| hsa-miR-7-5p    | CNNM4   | 1 | 1 | 1 | 3 |
| hsa-miR-96-5p   | CNNM3   | 1 | 1 | 1 | 3 |
| hsa-miR-7-5p    | CNN3    | 1 | 1 | 1 | 3 |
| hsa-miR-363-3p  | CNIH1   | 1 | 1 | 1 | 3 |
| hsa-miR-363-3p  | CNEP1R1 | 1 | 1 | 1 | 3 |
| hsa-miR-1304-3p | CNBP    | 1 | 1 | 1 | 3 |
| hsa-miR-548d-3p | CMTM6   | 1 | 1 | 1 | 3 |
| hsa-miR-489-3p  | CMTM6   | 1 | 1 | 1 | 3 |
| hsa-miR-1283    | CMTM4   | 1 | 1 | 1 | 3 |
| hsa-miR-512-3p  | CMPK1   | 1 | 1 | 1 | 3 |
| hsa-miR-20b-5p  | CMPK1   | 1 | 1 | 1 | 3 |
| hsa-miR-182-5p  | CLOCK   | 1 | 1 | 1 | 3 |
| hsa-miR-141-3p  | CLOCK   | 1 | 1 | 1 | 3 |
| hsa-miR-548f-3p | CLOCK   | 1 | 1 | 1 | 3 |
| hsa-miR-20b-5p  | CLOCK   | 1 | 1 | 1 | 3 |
| hsa-miR-106a-5p | CLIP4   | 1 | 1 | 1 | 3 |
| hsa-miR-96-3p   | CLIP4   | 1 | 1 | 1 | 3 |
| hsa-miR-20b-5p  | CLIP4   | 1 | 1 | 1 | 3 |
| hsa-miR-577     | CLIP4   | 1 | 1 | 1 | 3 |
| hsa-miR-4665-5p | CLIP2   | 1 | 1 | 1 | 3 |

|                 |         |   |   |   |   |
|-----------------|---------|---|---|---|---|
| hsa-miR-301b-3p | CLIP1   | 1 | 1 | 1 | 3 |
| hsa-miR-130b-3p | CLIP1   | 1 | 1 | 1 | 3 |
| hsa-miR-6777-5p | CLIP1   | 1 | 1 | 1 | 3 |
| hsa-miR-449a    | CLIC5   | 1 | 1 | 1 | 3 |
| hsa-miR-577     | CLIC4   | 1 | 1 | 1 | 3 |
| hsa-miR-122-5p  | CLIC4   | 1 | 1 | 1 | 3 |
| hsa-miR-1910-5p | CLIC4   | 1 | 1 | 1 | 3 |
| hsa-miR-577     | CLEC12B | 1 | 1 | 1 | 3 |
| hsa-miR-548j-5p | CLDN12  | 1 | 1 | 1 | 3 |
| hsa-miR-548y    | CLDN12  | 1 | 1 | 1 | 3 |
| hsa-miR-130b-3p | CLCN3   | 1 | 1 | 1 | 3 |
| hsa-miR-183-3p  | CLCN3   | 1 | 1 | 1 | 3 |
| hsa-miR-301b-3p | CLCN3   | 1 | 1 | 1 | 3 |
| hsa-miR-548d-3p | CLASP1  | 1 | 1 | 1 | 3 |
| hsa-miR-7-5p    | CKAP4   | 1 | 1 | 1 | 3 |
| hsa-miR-4665-5p | CITED4  | 1 | 1 | 1 | 3 |
| hsa-miR-182-5p  | CITED2  | 1 | 1 | 1 | 3 |
| hsa-miR-20b-5p  | CIT     | 1 | 1 | 1 | 3 |
| hsa-miR-363-3p  | CIC     | 1 | 1 | 1 | 3 |
| hsa-miR-6815-3p | CIC     | 1 | 1 | 1 | 3 |
| hsa-miR-3176    | CHTF8   | 1 | 1 | 1 | 3 |
| hsa-miR-888-5p  | CHST2   | 1 | 1 | 1 | 3 |
| hsa-miR-345-5p  | CHST2   | 1 | 1 | 1 | 3 |
| hsa-miR-6891-5p | CHRDL1  | 1 | 1 | 1 | 3 |
| hsa-miR-211-5p  | CHRDL1  | 1 | 1 | 1 | 3 |
| hsa-miR-211-5p  | CHORDC1 | 1 | 1 | 1 | 3 |
| hsa-miR-1301-3p | CHN1    | 1 | 1 | 1 | 3 |
| hsa-miR-31-3p   | CHMP4B  | 1 | 1 | 1 | 3 |
| hsa-miR-3662    | CHMP3   | 1 | 1 | 1 | 3 |
| hsa-miR-182-5p  | CHL1    | 1 | 1 | 1 | 3 |
| hsa-miR-130b-3p | CHIC1   | 1 | 1 | 1 | 3 |
| hsa-miR-20b-5p  | CHIC1   | 1 | 1 | 1 | 3 |
| hsa-miR-301b-3p | CHIC1   | 1 | 1 | 1 | 3 |
| hsa-miR-20b-5p  | CHD9    | 1 | 1 | 1 | 3 |
| hsa-miR-6891-5p | CHD4    | 1 | 1 | 1 | 3 |
| hsa-miR-3065-5p | CHD4    | 1 | 1 | 1 | 3 |
| hsa-miR-1226-3p | CHD3    | 1 | 1 | 1 | 3 |
| hsa-miR-7-5p    | CHAMP1  | 1 | 1 | 1 | 3 |
| hsa-miR-20b-5p  | CHAF1A  | 1 | 1 | 1 | 3 |
| hsa-miR-940     | CHAC1   | 1 | 1 | 1 | 3 |
| hsa-miR-130b-5p | CGNL1   | 1 | 1 | 1 | 3 |
| hsa-miR-106a-5p | CFL2    | 1 | 1 | 1 | 3 |
| hsa-miR-200c-3p | CFL2    | 1 | 1 | 1 | 3 |
| hsa-miR-940     | CFL2    | 1 | 1 | 1 | 3 |
| hsa-miR-130b-3p | CFL2    | 1 | 1 | 1 | 3 |
| hsa-miR-301b-3p | CFL2    | 1 | 1 | 1 | 3 |
| hsa-miR-20b-5p  | CFL2    | 1 | 1 | 1 | 3 |
| hsa-miR-3664-5p | CFHR5   | 1 | 1 | 1 | 3 |
| hsa-miR-449b-3p | CERK    | 1 | 1 | 1 | 3 |
| hsa-miR-106a-5p | CERCAM  | 1 | 1 | 1 | 3 |
| hsa-miR-20b-5p  | CERCAM  | 1 | 1 | 1 | 3 |
| hsa-miR-20b-5p  | CEP97   | 1 | 1 | 1 | 3 |
| hsa-miR-106a-5p | CEP97   | 1 | 1 | 1 | 3 |
| hsa-miR-20b-5p  | CEP57   | 1 | 1 | 1 | 3 |
| hsa-miR-130b-3p | CEP55   | 1 | 1 | 1 | 3 |
| hsa-miR-301b-3p | CEP55   | 1 | 1 | 1 | 3 |
| hsa-miR-518a-5p | CEP350  | 1 | 1 | 1 | 3 |
| hsa-miR-527     | CEP350  | 1 | 1 | 1 | 3 |

|                  |          |   |   |   |   |
|------------------|----------|---|---|---|---|
| hsa-miR-130b-3p  | CEP170   | 1 | 1 | 1 | 3 |
| hsa-miR-106a-5p  | CEP170   | 1 | 1 | 1 | 3 |
| hsa-miR-3662     | CEP170   | 1 | 1 | 1 | 3 |
| hsa-miR-20b-5p   | CEP170   | 1 | 1 | 1 | 3 |
| hsa-miR-301b-3p  | CEP170   | 1 | 1 | 1 | 3 |
| hsa-miR-548j-5p  | CEP120   | 1 | 1 | 1 | 3 |
| hsa-miR-548y     | CEP120   | 1 | 1 | 1 | 3 |
| hsa-miR-106a-5p  | CENPQ    | 1 | 1 | 1 | 3 |
| hsa-miR-20b-5p   | CENPQ    | 1 | 1 | 1 | 3 |
| hsa-miR-3662     | CENPK    | 1 | 1 | 1 | 3 |
| hsa-miR-548y     | CELSR3   | 1 | 1 | 1 | 3 |
| hsa-miR-548j-5p  | CELSR3   | 1 | 1 | 1 | 3 |
| hsa-miR-3150b-3p | CELSR2   | 1 | 1 | 1 | 3 |
| hsa-miR-548d-3p  | CELF1    | 1 | 1 | 1 | 3 |
| hsa-miR-877-5p   | CELF1    | 1 | 1 | 1 | 3 |
| hsa-miR-429      | CELF1    | 1 | 1 | 1 | 3 |
| hsa-miR-200c-3p  | CELF1    | 1 | 1 | 1 | 3 |
| hsa-miR-3662     | CELF1    | 1 | 1 | 1 | 3 |
| hsa-miR-3127-3p  | CELF1    | 1 | 1 | 1 | 3 |
| hsa-miR-200b-3p  | CELF1    | 1 | 1 | 1 | 3 |
| hsa-miR-3176     | CELF1    | 1 | 1 | 1 | 3 |
| hsa-miR-3150b-3p | CELF1    | 1 | 1 | 1 | 3 |
| hsa-miR-183-5p   | CELF1    | 1 | 1 | 1 | 3 |
| hsa-miR-512-3p   | CEBPG    | 1 | 1 | 1 | 3 |
| hsa-miR-3614-3p  | CDON     | 1 | 1 | 1 | 3 |
| hsa-miR-345-5p   | CDKN1A   | 1 | 1 | 1 | 3 |
| hsa-miR-20b-5p   | CDKN1A   | 1 | 1 | 1 | 3 |
| hsa-miR-106a-5p  | CDKN1A   | 1 | 1 | 1 | 3 |
| hsa-miR-449c-5p  | CDK6     | 1 | 1 | 1 | 3 |
| hsa-miR-449b-5p  | CDK6     | 1 | 1 | 1 | 3 |
| hsa-miR-183-3p   | CDK6     | 1 | 1 | 1 | 3 |
| hsa-miR-449a     | CDK6     | 1 | 1 | 1 | 3 |
| hsa-miR-548d-3p  | CDK5R1   | 1 | 1 | 1 | 3 |
| hsa-miR-106a-3p  | CDK19    | 1 | 1 | 1 | 3 |
| hsa-miR-130b-3p  | CDK19    | 1 | 1 | 1 | 3 |
| hsa-miR-18a-5p   | CDK19    | 1 | 1 | 1 | 3 |
| hsa-miR-301b-3p  | CDK19    | 1 | 1 | 1 | 3 |
| hsa-miR-130b-5p  | CDK12    | 1 | 1 | 1 | 3 |
| hsa-miR-200c-3p  | CDH11    | 1 | 1 | 1 | 3 |
| hsa-miR-548f-3p  | CDCA4    | 1 | 1 | 1 | 3 |
| hsa-miR-3651     | CDC5L    | 1 | 1 | 1 | 3 |
| hsa-miR-3619-5p  | CDC42SE1 | 1 | 1 | 1 | 3 |
| hsa-miR-548d-3p  | CDC37L1  | 1 | 1 | 1 | 3 |
| hsa-miR-301b-3p  | CDADC1   | 1 | 1 | 1 | 3 |
| hsa-miR-130b-3p  | CDADC1   | 1 | 1 | 1 | 3 |
| hsa-miR-940      | CD3EAP   | 1 | 1 | 1 | 3 |
| hsa-miR-522-3p   | CCSER2   | 1 | 1 | 1 | 3 |
| hsa-miR-3662     | CCSER2   | 1 | 1 | 1 | 3 |
| hsa-miR-20b-5p   | CCSER2   | 1 | 1 | 1 | 3 |
| hsa-miR-363-3p   | CCSER2   | 1 | 1 | 1 | 3 |
| hsa-miR-200c-3p  | CCNT2    | 1 | 1 | 1 | 3 |
| hsa-miR-7-5p     | CCNT2    | 1 | 1 | 1 | 3 |
| hsa-miR-429      | CCNT2    | 1 | 1 | 1 | 3 |
| hsa-miR-200b-3p  | CCNT2    | 1 | 1 | 1 | 3 |
| hsa-miR-31-5p    | CCNT1    | 1 | 1 | 1 | 3 |
| hsa-miR-9-5p     | CCNG1    | 1 | 1 | 1 | 3 |
| hsa-miR-122-5p   | CCNG1    | 1 | 1 | 1 | 3 |
| hsa-miR-96-5p    | CCNG1    | 1 | 1 | 1 | 3 |

|                  |         |   |   |   |   |
|------------------|---------|---|---|---|---|
| hsa-miR-200c-3p  | CCNE2   | 1 | 1 | 1 | 3 |
| hsa-miR-200a-3p  | CCNE2   | 1 | 1 | 1 | 3 |
| hsa-miR-6499-3p  | CCNE2   | 1 | 1 | 1 | 3 |
| hsa-miR-577      | CCNE2   | 1 | 1 | 1 | 3 |
| hsa-miR-449a     | CCNE2   | 1 | 1 | 1 | 3 |
| hsa-miR-449b-5p  | CCNE2   | 1 | 1 | 1 | 3 |
| hsa-miR-9-5p     | CCNDBP1 | 1 | 1 | 1 | 3 |
| hsa-miR-1248     | CCND2   | 1 | 1 | 1 | 3 |
| hsa-miR-106a-5p  | CCND1   | 1 | 1 | 1 | 3 |
| hsa-miR-20b-5p   | CCND1   | 1 | 1 | 1 | 3 |
| hsa-miR-548j-5p  | CCNB1   | 1 | 1 | 1 | 3 |
| hsa-miR-183-5p   | CCNB1   | 1 | 1 | 1 | 3 |
| hsa-miR-548y     | CCNB1   | 1 | 1 | 1 | 3 |
| hsa-miR-449a     | CCL22   | 1 | 1 | 1 | 3 |
| hsa-miR-20b-5p   | CCL1    | 1 | 1 | 1 | 3 |
| hsa-miR-141-3p   | CCDC71L | 1 | 1 | 1 | 3 |
| hsa-miR-106a-5p  | CCDC71L | 1 | 1 | 1 | 3 |
| hsa-miR-20b-5p   | CCDC71L | 1 | 1 | 1 | 3 |
| hsa-miR-200a-3p  | CCDC71L | 1 | 1 | 1 | 3 |
| hsa-miR-216b-5p  | CCDC65  | 1 | 1 | 1 | 3 |
| hsa-miR-512-3p   | CCDC6   | 1 | 1 | 1 | 3 |
| hsa-miR-122-5p   | CCDC43  | 1 | 1 | 1 | 3 |
| hsa-miR-215-5p   | CCDC121 | 1 | 1 | 1 | 3 |
| hsa-miR-940      | CCDC117 | 1 | 1 | 1 | 3 |
| hsa-miR-363-3p   | CCDC113 | 1 | 1 | 1 | 3 |
| hsa-miR-3616-3p  | CBX5    | 1 | 1 | 1 | 3 |
| hsa-miR-512-3p   | CBX5    | 1 | 1 | 1 | 3 |
| hsa-miR-548j-5p  | CBX3    | 1 | 1 | 1 | 3 |
| hsa-miR-449a     | CBX3    | 1 | 1 | 1 | 3 |
| hsa-miR-548y     | CBX3    | 1 | 1 | 1 | 3 |
| hsa-miR-130b-3p  | CBFB    | 1 | 1 | 1 | 3 |
| hsa-miR-429      | CASP2   | 1 | 1 | 1 | 3 |
| hsa-miR-200c-3p  | CASP2   | 1 | 1 | 1 | 3 |
| hsa-miR-96-5p    | CASP2   | 1 | 1 | 1 | 3 |
| hsa-miR-6777-5p  | CASKIN1 | 1 | 1 | 1 | 3 |
| hsa-miR-3150b-3p | CASKIN1 | 1 | 1 | 1 | 3 |
| hsa-miR-1266-5p  | CAPZB   | 1 | 1 | 1 | 3 |
| hsa-miR-1304-3p  | CAPZA2  | 1 | 1 | 1 | 3 |
| hsa-miR-7-5p     | CAPZA1  | 1 | 1 | 1 | 3 |
| hsa-miR-9-5p     | CAPZA1  | 1 | 1 | 1 | 3 |
| hsa-miR-106a-5p  | CAPRIN2 | 1 | 1 | 1 | 3 |
| hsa-miR-130b-3p  | CAPRIN2 | 1 | 1 | 1 | 3 |
| hsa-miR-301b-3p  | CAPRIN2 | 1 | 1 | 1 | 3 |
| hsa-miR-20b-5p   | CAPRIN2 | 1 | 1 | 1 | 3 |
| hsa-miR-211-5p   | CAPRIN1 | 1 | 1 | 1 | 3 |
| hsa-miR-106a-5p  | CAPN15  | 1 | 1 | 1 | 3 |
| hsa-miR-20b-5p   | CAPN15  | 1 | 1 | 1 | 3 |
| hsa-miR-1283     | CANX    | 1 | 1 | 1 | 3 |
| hsa-miR-940      | CAMSAP2 | 1 | 1 | 1 | 3 |
| hsa-miR-3616-5p  | CAMSAP2 | 1 | 1 | 1 | 3 |
| hsa-miR-200c-3p  | CAMSAP2 | 1 | 1 | 1 | 3 |
| hsa-miR-130b-3p  | CAMSAP2 | 1 | 1 | 1 | 3 |
| hsa-miR-429      | CAMSAP2 | 1 | 1 | 1 | 3 |
| hsa-miR-200b-3p  | CAMSAP2 | 1 | 1 | 1 | 3 |
| hsa-miR-301b-3p  | CAMSAP2 | 1 | 1 | 1 | 3 |
| hsa-miR-18a-3p   | CAMKV   | 1 | 1 | 1 | 3 |
| hsa-miR-7-5p     | CALU    | 1 | 1 | 1 | 3 |
| hsa-miR-3662     | CALR    | 1 | 1 | 1 | 3 |

|                  |           |   |   |   |   |
|------------------|-----------|---|---|---|---|
| hsa-miR-7-5p     | CALM3     | 1 | 1 | 1 | 3 |
| hsa-miR-891b     | CALM2     | 1 | 1 | 1 | 3 |
| hsa-miR-548f-3p  | CALM1     | 1 | 1 | 1 | 3 |
| hsa-miR-106a-5p  | CADM2     | 1 | 1 | 1 | 3 |
| hsa-miR-20b-5p   | CADM2     | 1 | 1 | 1 | 3 |
| hsa-miR-7-5p     | CACNG7    | 1 | 1 | 1 | 3 |
| hsa-miR-203b-3p  | CACNB2    | 1 | 1 | 1 | 3 |
| hsa-miR-4664-5p  | CABP4     | 1 | 1 | 1 | 3 |
| hsa-miR-7974     | CABP4     | 1 | 1 | 1 | 3 |
| hsa-miR-548d-3p  | CABLES1   | 1 | 1 | 1 | 3 |
| hsa-miR-200b-3p  | CAB39     | 1 | 1 | 1 | 3 |
| hsa-miR-429      | CAB39     | 1 | 1 | 1 | 3 |
| hsa-miR-200c-3p  | CAB39     | 1 | 1 | 1 | 3 |
| hsa-miR-20b-5p   | C7orf43   | 1 | 1 | 1 | 3 |
| hsa-miR-15b-3p   | C5orf22   | 1 | 1 | 1 | 3 |
| hsa-miR-7-5p     | C5orf22   | 1 | 1 | 1 | 3 |
| hsa-miR-891b     | C4orf32   | 1 | 1 | 1 | 3 |
| hsa-miR-526b-5p  | C1orf52   | 1 | 1 | 1 | 3 |
| hsa-miR-3664-3p  | C1orf210  | 1 | 1 | 1 | 3 |
| hsa-miR-7-5p     | C1orf21   | 1 | 1 | 1 | 3 |
| hsa-miR-130b-5p  | C1GALT1   | 1 | 1 | 1 | 3 |
| hsa-miR-31-5p    | C19orf12  | 1 | 1 | 1 | 3 |
| hsa-miR-512-3p   | C18orf32  | 1 | 1 | 1 | 3 |
| hsa-miR-548d-3p  | C18orf25  | 1 | 1 | 1 | 3 |
| hsa-miR-3619-5p  | C17orf49  | 1 | 1 | 1 | 3 |
| hsa-miR-636      | C17orf102 | 1 | 1 | 1 | 3 |
| hsa-miR-130b-3p  | C16orf70  | 1 | 1 | 1 | 3 |
| hsa-miR-7705     | C15orf59  | 1 | 1 | 1 | 3 |
| hsa-miR-20b-5p   | C14orf28  | 1 | 1 | 1 | 3 |
| hsa-miR-877-5p   | C12orf4   | 1 | 1 | 1 | 3 |
| hsa-miR-216b-5p  | C11orf57  | 1 | 1 | 1 | 3 |
| hsa-miR-512-3p   | C11orf54  | 1 | 1 | 1 | 3 |
| hsa-miR-363-3p   | C11orf24  | 1 | 1 | 1 | 3 |
| hsa-miR-3619-5p  | C10orf76  | 1 | 1 | 1 | 3 |
| hsa-miR-3662     | BZW1      | 1 | 1 | 1 | 3 |
| hsa-miR-449c-5p  | BTRC      | 1 | 1 | 1 | 3 |
| hsa-miR-130b-5p  | BTN3A2    | 1 | 1 | 1 | 3 |
| hsa-miR-20b-5p   | BTG3      | 1 | 1 | 1 | 3 |
| hsa-miR-106a-5p  | BTG3      | 1 | 1 | 1 | 3 |
| hsa-miR-6891-5p  | BTG2      | 1 | 1 | 1 | 3 |
| hsa-miR-210-5p   | BTG2      | 1 | 1 | 1 | 3 |
| hsa-miR-363-3p   | BTG2      | 1 | 1 | 1 | 3 |
| hsa-miR-203a-5p  | BTG2      | 1 | 1 | 1 | 3 |
| hsa-miR-449c-5p  | BTG2      | 1 | 1 | 1 | 3 |
| hsa-miR-3150b-3p | BTG2      | 1 | 1 | 1 | 3 |
| hsa-miR-3934-3p  | BTG2      | 1 | 1 | 1 | 3 |
| hsa-miR-130b-3p  | BTG1      | 1 | 1 | 1 | 3 |
| hsa-miR-301b-3p  | BTG1      | 1 | 1 | 1 | 3 |
| hsa-miR-877-5p   | BTF3L4    | 1 | 1 | 1 | 3 |
| hsa-miR-3923     | BTF3L4    | 1 | 1 | 1 | 3 |
| hsa-miR-301b-3p  | BTF3L4    | 1 | 1 | 1 | 3 |
| hsa-miR-130b-3p  | BTF3L4    | 1 | 1 | 1 | 3 |
| hsa-miR-20b-5p   | BTBD7     | 1 | 1 | 1 | 3 |
| hsa-miR-548d-3p  | BTBD3     | 1 | 1 | 1 | 3 |
| hsa-miR-3662     | BTBD3     | 1 | 1 | 1 | 3 |
| hsa-miR-301b-3p  | BTBD3     | 1 | 1 | 1 | 3 |
| hsa-miR-130b-3p  | BTBD3     | 1 | 1 | 1 | 3 |
| hsa-miR-3616-5p  | BTBD1     | 1 | 1 | 1 | 3 |

|                  |         |   |   |   |   |
|------------------|---------|---|---|---|---|
| hsa-miR-6891-5p  | BSDC1   | 1 | 1 | 1 | 3 |
| hsa-miR-301b-3p  | BRWD1   | 1 | 1 | 1 | 3 |
| hsa-miR-130b-3p  | BRWD1   | 1 | 1 | 1 | 3 |
| hsa-miR-1283     | BRWD1   | 1 | 1 | 1 | 3 |
| hsa-miR-182-5p   | BRWD1   | 1 | 1 | 1 | 3 |
| hsa-miR-6715a-3p | BRPF1   | 1 | 1 | 1 | 3 |
| hsa-miR-122-5p   | BROX    | 1 | 1 | 1 | 3 |
| hsa-miR-20b-5p   | BRMS1L  | 1 | 1 | 1 | 3 |
| hsa-miR-548y     | BRIX1   | 1 | 1 | 1 | 3 |
| hsa-miR-548j-5p  | BRIX1   | 1 | 1 | 1 | 3 |
| hsa-miR-200a-3p  | BRD3    | 1 | 1 | 1 | 3 |
| hsa-miR-141-3p   | BRD3    | 1 | 1 | 1 | 3 |
| hsa-miR-106a-5p  | BNIP2   | 1 | 1 | 1 | 3 |
| hsa-miR-20b-5p   | BNIP2   | 1 | 1 | 1 | 3 |
| hsa-miR-3074-5p  | BNC2    | 1 | 1 | 1 | 3 |
| hsa-miR-20b-5p   | BMPR2   | 1 | 1 | 1 | 3 |
| hsa-miR-449a     | BMP3    | 1 | 1 | 1 | 3 |
| hsa-miR-449b-5p  | BMP3    | 1 | 1 | 1 | 3 |
| hsa-miR-548y     | BMI1    | 1 | 1 | 1 | 3 |
| hsa-miR-548j-5p  | BMI1    | 1 | 1 | 1 | 3 |
| hsa-miR-301b-3p  | BLCAP   | 1 | 1 | 1 | 3 |
| hsa-miR-130b-3p  | BLCAP   | 1 | 1 | 1 | 3 |
| hsa-miR-3662     | BLCAP   | 1 | 1 | 1 | 3 |
| hsa-miR-106a-5p  | BICD2   | 1 | 1 | 1 | 3 |
| hsa-miR-141-3p   | BICD2   | 1 | 1 | 1 | 3 |
| hsa-miR-200a-3p  | BICD2   | 1 | 1 | 1 | 3 |
| hsa-miR-20b-5p   | BICD2   | 1 | 1 | 1 | 3 |
| hsa-miR-6499-3p  | BHLHB9  | 1 | 1 | 1 | 3 |
| hsa-miR-425-5p   | BHLHB9  | 1 | 1 | 1 | 3 |
| hsa-miR-425-5p   | BEX4    | 1 | 1 | 1 | 3 |
| hsa-miR-182-5p   | BDNF    | 1 | 1 | 1 | 3 |
| hsa-miR-425-5p   | BCOR    | 1 | 1 | 1 | 3 |
| hsa-miR-449a     | BCL2L13 | 1 | 1 | 1 | 3 |
| hsa-miR-449b-5p  | BCL2L13 | 1 | 1 | 1 | 3 |
| hsa-miR-3616-3p  | BCL2L12 | 1 | 1 | 1 | 3 |
| hsa-miR-363-3p   | BCL2L11 | 1 | 1 | 1 | 3 |
| hsa-miR-211-5p   | BCL2    | 1 | 1 | 1 | 3 |
| hsa-miR-527      | BCL11B  | 1 | 1 | 1 | 3 |
| hsa-miR-363-3p   | BCL11B  | 1 | 1 | 1 | 3 |
| hsa-miR-518a-5p  | BCL11B  | 1 | 1 | 1 | 3 |
| hsa-miR-7-5p     | BCAT1   | 1 | 1 | 1 | 3 |
| hsa-miR-106a-5p  | BBX     | 1 | 1 | 1 | 3 |
| hsa-miR-20b-5p   | BBX     | 1 | 1 | 1 | 3 |
| hsa-miR-548y     | BBS10   | 1 | 1 | 1 | 3 |
| hsa-miR-548j-5p  | BBS10   | 1 | 1 | 1 | 3 |
| hsa-miR-363-3p   | BAZ2B   | 1 | 1 | 1 | 3 |
| hsa-miR-940      | BAZ2A   | 1 | 1 | 1 | 3 |
| hsa-miR-449b-5p  | BAZ2A   | 1 | 1 | 1 | 3 |
| hsa-miR-449a     | BAZ2A   | 1 | 1 | 1 | 3 |
| hsa-miR-3189-3p  | BASP1   | 1 | 1 | 1 | 3 |
| hsa-miR-3150b-3p | BASP1   | 1 | 1 | 1 | 3 |
| hsa-miR-141-3p   | BAP1    | 1 | 1 | 1 | 3 |
| hsa-miR-200a-3p  | BAP1    | 1 | 1 | 1 | 3 |
| hsa-miR-200b-3p  | BAP1    | 1 | 1 | 1 | 3 |
| hsa-miR-429      | BAP1    | 1 | 1 | 1 | 3 |
| hsa-miR-200c-3p  | BAP1    | 1 | 1 | 1 | 3 |
| hsa-miR-20b-5p   | BAMBI   | 1 | 1 | 1 | 3 |
| hsa-miR-363-3p   | BAK1    | 1 | 1 | 1 | 3 |



|                  |          |   |   |   |   |
|------------------|----------|---|---|---|---|
| hsa-miR-130b-3p  | BAHD1    | 1 | 1 | 1 | 3 |
| hsa-miR-3065-5p  | BAHD1    | 1 | 1 | 1 | 3 |
| hsa-miR-31-3p    | BACH1    | 1 | 1 | 1 | 3 |
| hsa-miR-96-3p    | BACH1    | 1 | 1 | 1 | 3 |
| hsa-miR-205-5p   | B4GALT6  | 1 | 1 | 1 | 3 |
| hsa-miR-6891-5p  | B4GALT1  | 1 | 1 | 1 | 3 |
| hsa-miR-3616-3p  | AURKA    | 1 | 1 | 1 | 3 |
| hsa-miR-9-5p     | AUH      | 1 | 1 | 1 | 3 |
| hsa-miR-1266-5p  | ATXN7L3B | 1 | 1 | 1 | 3 |
| hsa-miR-3616-3p  | ATXN7L3B | 1 | 1 | 1 | 3 |
| hsa-miR-1226-3p  | ATXN7L3B | 1 | 1 | 1 | 3 |
| hsa-miR-155-3p   | ATXN3    | 1 | 1 | 1 | 3 |
| hsa-miR-141-5p   | ATXN2L   | 1 | 1 | 1 | 3 |
| hsa-miR-449a     | ATXN1L   | 1 | 1 | 1 | 3 |
| hsa-miR-940      | ATXN1    | 1 | 1 | 1 | 3 |
| hsa-miR-200c-3p  | ATRX     | 1 | 1 | 1 | 3 |
| hsa-miR-577      | ATRNL1   | 1 | 1 | 1 | 3 |
| hsa-miR-548d-3p  | ATRNL1   | 1 | 1 | 1 | 3 |
| hsa-miR-425-5p   | ATP5G3   | 1 | 1 | 1 | 3 |
| hsa-miR-1226-3p  | ATP2A2   | 1 | 1 | 1 | 3 |
| hsa-miR-4724-5p  | ATP1B3   | 1 | 1 | 1 | 3 |
| hsa-miR-18a-5p   | ATM      | 1 | 1 | 1 | 3 |
| hsa-miR-18b-5p   | ATM      | 1 | 1 | 1 | 3 |
| hsa-miR-106a-5p  | ATL3     | 1 | 1 | 1 | 3 |
| hsa-miR-20b-5p   | ATL3     | 1 | 1 | 1 | 3 |
| hsa-miR-1248     | ATG9A    | 1 | 1 | 1 | 3 |
| hsa-miR-20b-5p   | ATG16L1  | 1 | 1 | 1 | 3 |
| hsa-miR-20b-5p   | ATG14    | 1 | 1 | 1 | 3 |
| hsa-miR-548d-3p  | ATF7IP   | 1 | 1 | 1 | 3 |
| hsa-miR-4763-5p  | ATCAY    | 1 | 1 | 1 | 3 |
| hsa-miR-20b-5p   | ATAD2    | 1 | 1 | 1 | 3 |
| hsa-miR-106a-5p  | ATAD2    | 1 | 1 | 1 | 3 |
| hsa-miR-7-5p     | ASXL1    | 1 | 1 | 1 | 3 |
| hsa-miR-96-5p    | ASH1L    | 1 | 1 | 1 | 3 |
| hsa-miR-940      | ASB6     | 1 | 1 | 1 | 3 |
| hsa-miR-138-1-3p | AS3MT    | 1 | 1 | 1 | 3 |
| hsa-miR-940      | ARSA     | 1 | 1 | 1 | 3 |
| hsa-miR-205-3p   | ARPP19   | 1 | 1 | 1 | 3 |
| hsa-miR-6844     | ARNTL    | 1 | 1 | 1 | 3 |
| hsa-miR-363-5p   | ARMCX6   | 1 | 1 | 1 | 3 |
| hsa-miR-7-5p     | ARMC10   | 1 | 1 | 1 | 3 |
| hsa-miR-3662     | ARL8A    | 1 | 1 | 1 | 3 |
| hsa-miR-216b-5p  | ARL6IP1  | 1 | 1 | 1 | 3 |
| hsa-miR-130b-3p  | ARL6IP1  | 1 | 1 | 1 | 3 |
| hsa-miR-512-3p   | ARL5B    | 1 | 1 | 1 | 3 |
| hsa-miR-449c-5p  | ARL5B    | 1 | 1 | 1 | 3 |
| hsa-miR-6715a-3p | ARL4C    | 1 | 1 | 1 | 3 |
| hsa-miR-215-5p   | ARL2BP   | 1 | 1 | 1 | 3 |
| hsa-miR-548y     | ARL13B   | 1 | 1 | 1 | 3 |
| hsa-miR-548j-5p  | ARL13B   | 1 | 1 | 1 | 3 |
| hsa-miR-425-5p   | ARIH1    | 1 | 1 | 1 | 3 |
| hsa-miR-767-3p   | ARID5B   | 1 | 1 | 1 | 3 |
| hsa-miR-182-3p   | ARID5B   | 1 | 1 | 1 | 3 |
| hsa-miR-20b-5p   | ARID4B   | 1 | 1 | 1 | 3 |
| hsa-miR-106a-5p  | ARID4B   | 1 | 1 | 1 | 3 |
| hsa-miR-130b-3p  | ARID4B   | 1 | 1 | 1 | 3 |
| hsa-miR-363-3p   | ARID1B   | 1 | 1 | 1 | 3 |
| hsa-miR-3150b-3p | ARID1A   | 1 | 1 | 1 | 3 |

|                 |          |   |   |   |   |
|-----------------|----------|---|---|---|---|
| hsa-miR-6891-5p | ARID1A   | 1 | 1 | 1 | 3 |
| hsa-miR-1266-5p | ARID1A   | 1 | 1 | 1 | 3 |
| hsa-miR-31-5p   | ARID1A   | 1 | 1 | 1 | 3 |
| hsa-miR-548d-3p | ARID1A   | 1 | 1 | 1 | 3 |
| hsa-miR-18a-3p  | ARHGEF7  | 1 | 1 | 1 | 3 |
| hsa-miR-155-3p  | ARHGEF33 | 1 | 1 | 1 | 3 |
| hsa-miR-138-5p  | ARHGEF3  | 1 | 1 | 1 | 3 |
| hsa-miR-130b-3p | ARHGEF26 | 1 | 1 | 1 | 3 |
| hsa-miR-301b-3p | ARHGEF26 | 1 | 1 | 1 | 3 |
| hsa-miR-138-5p  | ARHGAP42 | 1 | 1 | 1 | 3 |
| hsa-miR-3131    | ARHGAP39 | 1 | 1 | 1 | 3 |
| hsa-miR-20b-5p  | ARHGAP35 | 1 | 1 | 1 | 3 |
| hsa-miR-183-5p  | ARHGAP21 | 1 | 1 | 1 | 3 |
| hsa-miR-3662    | ARHGAP15 | 1 | 1 | 1 | 3 |
| hsa-miR-130b-3p | ARHGAP12 | 1 | 1 | 1 | 3 |
| hsa-miR-301b-3p | ARHGAP12 | 1 | 1 | 1 | 3 |
| hsa-miR-106a-5p | ARHGAP12 | 1 | 1 | 1 | 3 |
| hsa-miR-20b-5p  | ARHGAP12 | 1 | 1 | 1 | 3 |
| hsa-miR-3065-5p | ARHGAP12 | 1 | 1 | 1 | 3 |
| hsa-miR-20b-5p  | ARHGAP1  | 1 | 1 | 1 | 3 |
| hsa-miR-130b-3p | ARHGAP1  | 1 | 1 | 1 | 3 |
| hsa-miR-449a    | ARHGAP1  | 1 | 1 | 1 | 3 |
| hsa-miR-449c-5p | ARHGAP1  | 1 | 1 | 1 | 3 |
| hsa-miR-940     | ARHGAP1  | 1 | 1 | 1 | 3 |
| hsa-miR-449b-5p | ARHGAP1  | 1 | 1 | 1 | 3 |
| hsa-miR-301b-3p | ARHGAP1  | 1 | 1 | 1 | 3 |
| hsa-miR-106a-5p | ARHGAP1  | 1 | 1 | 1 | 3 |
| hsa-miR-215-5p  | ARFGEF1  | 1 | 1 | 1 | 3 |
| hsa-miR-183-5p  | ARFGAP2  | 1 | 1 | 1 | 3 |
| hsa-miR-7-5p    | ARF4     | 1 | 1 | 1 | 3 |
| hsa-miR-31-5p   | ARF1     | 1 | 1 | 1 | 3 |
| hsa-miR-3616-3p | ARF1     | 1 | 1 | 1 | 3 |
| hsa-miR-135b-5p | ARC      | 1 | 1 | 1 | 3 |
| hsa-miR-767-3p  | ARAP2    | 1 | 1 | 1 | 3 |
| hsa-miR-20b-5p  | ARAP2    | 1 | 1 | 1 | 3 |
| hsa-miR-211-5p  | ARAP2    | 1 | 1 | 1 | 3 |
| hsa-miR-548j-5p | AQP3     | 1 | 1 | 1 | 3 |
| hsa-miR-548y    | AQP3     | 1 | 1 | 1 | 3 |
| hsa-miR-96-5p   | APPL1    | 1 | 1 | 1 | 3 |
| hsa-miR-629-3p  | APLN     | 1 | 1 | 1 | 3 |
| hsa-miR-135b-5p | APC      | 1 | 1 | 1 | 3 |
| hsa-miR-526b-5p | APBB2    | 1 | 1 | 1 | 3 |
| hsa-miR-940     | APAF1    | 1 | 1 | 1 | 3 |
| hsa-miR-9-5p    | AP3B1    | 1 | 1 | 1 | 3 |
| hsa-miR-211-5p  | AP1S2    | 1 | 1 | 1 | 3 |
| hsa-miR-6781-3p | ANXA5    | 1 | 1 | 1 | 3 |
| hsa-miR-363-3p  | ANP32E   | 1 | 1 | 1 | 3 |
| hsa-miR-3161    | ANP32E   | 1 | 1 | 1 | 3 |
| hsa-miR-548j-5p | ANP32B   | 1 | 1 | 1 | 3 |
| hsa-miR-548y    | ANP32B   | 1 | 1 | 1 | 3 |
| hsa-miR-20b-5p  | ANKRD52  | 1 | 1 | 1 | 3 |
| hsa-miR-106a-5p | ANKRD52  | 1 | 1 | 1 | 3 |
| hsa-miR-18b-3p  | ANKRD52  | 1 | 1 | 1 | 3 |
| hsa-miR-3934-3p | ANKRD50  | 1 | 1 | 1 | 3 |
| hsa-miR-106a-5p | ANKRD50  | 1 | 1 | 1 | 3 |
| hsa-miR-20b-5p  | ANKRD50  | 1 | 1 | 1 | 3 |
| hsa-miR-20b-5p  | ANKRD33E | 1 | 1 | 1 | 3 |
| hsa-miR-106a-5p | ANKRD33E | 1 | 1 | 1 | 3 |

|                 |          |   |   |   |   |
|-----------------|----------|---|---|---|---|
| hsa-miR-130b-5p | ANKRD28  | 1 | 1 | 1 | 3 |
| hsa-miR-15b-3p  | ANKRD27  | 1 | 1 | 1 | 3 |
| hsa-miR-20b-5p  | ANKRD13C | 1 | 1 | 1 | 3 |
| hsa-miR-122-5p  | ANKRD13C | 1 | 1 | 1 | 3 |
| hsa-miR-20b-5p  | ANKRD12  | 1 | 1 | 1 | 3 |
| hsa-miR-20b-5p  | ANKIB1   | 1 | 1 | 1 | 3 |
| hsa-miR-20b-5p  | ANKH     | 1 | 1 | 1 | 3 |
| hsa-miR-106a-5p | ANKH     | 1 | 1 | 1 | 3 |
| hsa-miR-211-5p  | ANKFY1   | 1 | 1 | 1 | 3 |
| hsa-miR-211-5p  | ANGPTL2  | 1 | 1 | 1 | 3 |
| hsa-miR-215-5p  | ANAPC10  | 1 | 1 | 1 | 3 |
| hsa-miR-205-5p  | AMOT     | 1 | 1 | 1 | 3 |
| hsa-miR-3619-5p | AMER1    | 1 | 1 | 1 | 3 |
| hsa-miR-96-5p   | ALK      | 1 | 1 | 1 | 3 |
| hsa-miR-7-5p    | ALG9     | 1 | 1 | 1 | 3 |
| hsa-miR-122-5p  | ALDOA    | 1 | 1 | 1 | 3 |
| hsa-miR-1283    | ALDH5A1  | 1 | 1 | 1 | 3 |
| hsa-miR-6781-3p | ALDH5A1  | 1 | 1 | 1 | 3 |
| hsa-miR-210-3p  | ALDH5A1  | 1 | 1 | 1 | 3 |
| hsa-miR-215-5p  | ALCAM    | 1 | 1 | 1 | 3 |
| hsa-miR-20b-5p  | AKTIP    | 1 | 1 | 1 | 3 |
| hsa-miR-122-5p  | AKT3     | 1 | 1 | 1 | 3 |
| hsa-miR-3664-3p | AKIRIN1  | 1 | 1 | 1 | 3 |
| hsa-miR-216b-5p | AKIP1    | 1 | 1 | 1 | 3 |
| hsa-miR-183-5p  | AKAP12   | 1 | 1 | 1 | 3 |
| hsa-miR-106a-5p | AKAP11   | 1 | 1 | 1 | 3 |
| hsa-miR-548d-3p | AKAP11   | 1 | 1 | 1 | 3 |
| hsa-miR-518a-5p | AKAP10   | 1 | 1 | 1 | 3 |
| hsa-miR-527     | AKAP10   | 1 | 1 | 1 | 3 |
| hsa-miR-106a-3p | AKAP10   | 1 | 1 | 1 | 3 |
| hsa-miR-522-3p  | AKAP1    | 1 | 1 | 1 | 3 |
| hsa-miR-210-3p  | AIFM3    | 1 | 1 | 1 | 3 |
| hsa-miR-3619-5p | AHNAK2   | 1 | 1 | 1 | 3 |
| hsa-miR-1283    | AHI1     | 1 | 1 | 1 | 3 |
| hsa-miR-940     | AHCYL2   | 1 | 1 | 1 | 3 |
| hsa-miR-130b-3p | AGO1     | 1 | 1 | 1 | 3 |
| hsa-miR-106a-5p | AGO1     | 1 | 1 | 1 | 3 |
| hsa-miR-138-5p  | AGO1     | 1 | 1 | 1 | 3 |
| hsa-miR-20b-5p  | AGO1     | 1 | 1 | 1 | 3 |
| hsa-miR-425-5p  | AFF4     | 1 | 1 | 1 | 3 |
| hsa-miR-548f-3p | ADSS     | 1 | 1 | 1 | 3 |
| hsa-miR-3616-5p | ADPRHL1  | 1 | 1 | 1 | 3 |
| hsa-miR-301a-5p | ADPRH    | 1 | 1 | 1 | 3 |
| hsa-miR-301b-5p | ADPRH    | 1 | 1 | 1 | 3 |
| hsa-miR-182-5p  | ADCY6    | 1 | 1 | 1 | 3 |
| hsa-miR-96-5p   | ADCY6    | 1 | 1 | 1 | 3 |
| hsa-miR-3662    | ADAMTS1  | 1 | 1 | 1 | 3 |
| hsa-miR-512-3p  | ADAM17   | 1 | 1 | 1 | 3 |
| hsa-miR-548f-3p | ACVR2B   | 1 | 1 | 1 | 3 |
| hsa-miR-135b-5p | ACVR1B   | 1 | 1 | 1 | 3 |
| hsa-miR-210-3p  | ACVR1B   | 1 | 1 | 1 | 3 |
| hsa-miR-301b-3p | ACVR1    | 1 | 1 | 1 | 3 |
| hsa-miR-130b-3p | ACVR1    | 1 | 1 | 1 | 3 |
| hsa-miR-548j-5p | ACTN4    | 1 | 1 | 1 | 3 |
| hsa-miR-548y    | ACTN4    | 1 | 1 | 1 | 3 |
| hsa-miR-4665-5p | ACTB     | 1 | 1 | 1 | 3 |
| hsa-miR-3662    | ACTA1    | 1 | 1 | 1 | 3 |
| hsa-miR-526b-5p | ACSL6    | 1 | 1 | 1 | 3 |

|                 |        |   |   |   |   |
|-----------------|--------|---|---|---|---|
| hsa-miR-106a-5p | ACSL4  | 1 | 1 | 1 | 3 |
| hsa-miR-20b-5p  | ACSL4  | 1 | 1 | 1 | 3 |
| hsa-miR-301b-3p | ACSL4  | 1 | 1 | 1 | 3 |
| hsa-miR-527     | ACSL4  | 1 | 1 | 1 | 3 |
| hsa-miR-130b-3p | ACSL4  | 1 | 1 | 1 | 3 |
| hsa-miR-205-5p  | ACSL4  | 1 | 1 | 1 | 3 |
| hsa-miR-518a-5p | ACSL4  | 1 | 1 | 1 | 3 |
| hsa-miR-3662    | ACSL4  | 1 | 1 | 1 | 3 |
| hsa-miR-96-3p   | ACSL3  | 1 | 1 | 1 | 3 |
| hsa-miR-205-5p  | ACSL1  | 1 | 1 | 1 | 3 |
| hsa-miR-301b-3p | ACBD5  | 1 | 1 | 1 | 3 |
| hsa-miR-130b-3p | ACBD5  | 1 | 1 | 1 | 3 |
| hsa-miR-940     | ACAP2  | 1 | 1 | 1 | 3 |
| hsa-miR-599     | ABI2   | 1 | 1 | 1 | 3 |
| hsa-miR-20b-5p  | ABHD2  | 1 | 1 | 1 | 3 |
| hsa-miR-512-3p  | ABHD15 | 1 | 1 | 1 | 3 |
| hsa-miR-96-5p   | ABCD1  | 1 | 1 | 1 | 3 |
| hsa-miR-4665-5p | ABCC6  | 1 | 1 | 1 | 3 |
| hsa-miR-4758-3p | ABCC5  | 1 | 1 | 1 | 3 |
| hsa-miR-105-5p  | ABCC4  | 1 | 1 | 1 | 3 |
| hsa-miR-31-5p   | ABCB9  | 1 | 1 | 1 | 3 |
| hsa-miR-105-5p  | ABCB5  | 1 | 1 | 1 | 3 |
| hsa-miR-20b-5p  | ABCA1  | 1 | 1 | 1 | 3 |
| hsa-miR-1226-3p | AAMP   | 1 | 1 | 1 | 3 |
| hsa-miR-548d-3p | AAGAB  | 1 | 1 | 1 | 3 |

| target-up Gene    | miRDB | miRTarBas | TargetScar | Sum |
|-------------------|-------|-----------|------------|-----|
| hsa-miR-5 ZYG11A  | 1     | 1         | 1          | 3   |
| hsa-miR-1 ZSWIM6  | 1     | 1         | 1          | 3   |
| hsa-miR-6 ZSWIM6  | 1     | 1         | 1          | 3   |
| hsa-miR-4 ZNRF3   | 1     | 1         | 1          | 3   |
| hsa-miR-4 ZNRF2   | 1     | 1         | 1          | 3   |
| hsa-miR-1 ZNF85   | 1     | 1         | 1          | 3   |
| hsa-miR-4 ZNF704  | 1     | 1         | 1          | 3   |
| hsa-miR-4 ZNF701  | 1     | 1         | 1          | 3   |
| hsa-miR-4 ZNF691  | 1     | 1         | 1          | 3   |
| hsa-miR-3 ZNF678  | 1     | 1         | 1          | 3   |
| hsa-miR-1 ZNF654  | 1     | 1         | 1          | 3   |
| hsa-miR-2 ZNF644  | 1     | 1         | 1          | 3   |
| hsa-let-7c ZNF644 | 1     | 1         | 1          | 3   |
| hsa-miR-4 ZNF622  | 1     | 1         | 1          | 3   |
| hsa-let-7c ZNF566 | 1     | 1         | 1          | 3   |
| hsa-miR-2 ZNF526  | 1     | 1         | 1          | 3   |
| hsa-miR-1 ZNF460  | 1     | 1         | 1          | 3   |
| hsa-miR-4 ZNF449  | 1     | 1         | 1          | 3   |
| hsa-miR-1 ZNF445  | 1     | 1         | 1          | 3   |
| hsa-miR-2 ZNF443  | 1     | 1         | 1          | 3   |
| hsa-miR-1 ZNF385A | 1     | 1         | 1          | 3   |
| hsa-miR-4 ZNF275  | 1     | 1         | 1          | 3   |
| hsa-miR-4 ZNF267  | 1     | 1         | 1          | 3   |
| hsa-miR-1 ZNF25   | 1     | 1         | 1          | 3   |
| hsa-miR-1 ZNF207  | 1     | 1         | 1          | 3   |
| hsa-miR-2 ZNF207  | 1     | 1         | 1          | 3   |
| hsa-miR-1 ZNF138  | 1     | 1         | 1          | 3   |
| hsa-miR-1 ZNF117  | 1     | 1         | 1          | 3   |
| hsa-miR-2 ZNF107  | 1     | 1         | 1          | 3   |
| hsa-miR-1 ZMYND11 | 1     | 1         | 1          | 3   |
| hsa-miR-4 ZMAT3   | 1     | 1         | 1          | 3   |
| hsa-miR-1 ZFYVE9  | 1     | 1         | 1          | 3   |
| hsa-miR-1 ZFYVE1  | 1     | 1         | 1          | 3   |
| hsa-miR-2 ZFP91   | 1     | 1         | 1          | 3   |
| hsa-miR-1 ZFP36L2 | 1     | 1         | 1          | 3   |
| hsa-miR-2 ZFP30   | 1     | 1         | 1          | 3   |
| hsa-miR-1 ZFP28   | 1     | 1         | 1          | 3   |
| hsa-miR-4 ZFHX4   | 1     | 1         | 1          | 3   |
| hsa-miR-2 ZFHX3   | 1     | 1         | 1          | 3   |
| hsa-miR-1 ZEB1    | 1     | 1         | 1          | 3   |
| hsa-let-7c ZCCHC3 | 1     | 1         | 1          | 3   |
| hsa-miR-4 ZCCHC3  | 1     | 1         | 1          | 3   |
| hsa-miR-2 ZCCHC24 | 1     | 1         | 1          | 3   |
| hsa-miR-1 ZCCHC2  | 1     | 1         | 1          | 3   |
| hsa-miR-1 ZBTB6   | 1     | 1         | 1          | 3   |
| hsa-miR-2 ZBTB5   | 1     | 1         | 1          | 3   |
| hsa-let-7c ZBTB5  | 1     | 1         | 1          | 3   |
| hsa-miR-5 ZBTB5   | 1     | 1         | 1          | 3   |
| hsa-miR-5 ZBTB44  | 1     | 1         | 1          | 3   |
| hsa-miR-1 ZBTB44  | 1     | 1         | 1          | 3   |
| hsa-miR-3 ZBTB43  | 1     | 1         | 1          | 3   |
| hsa-miR-1 ZBTB34  | 1     | 1         | 1          | 3   |
| hsa-miR-4 ZBTB34  | 1     | 1         | 1          | 3   |
| hsa-miR-2 ZBTB22  | 1     | 1         | 1          | 3   |
| hsa-miR-1 ZBTB21  | 1     | 1         | 1          | 3   |
| hsa-miR-1 ZBTB18  | 1     | 1         | 1          | 3   |
| hsa-miR-1 ZBTB18  | 1     | 1         | 1          | 3   |

|                    |   |   |   |   |
|--------------------|---|---|---|---|
| hsa-miR-2 ZBTB10   | 1 | 1 | 1 | 3 |
| hsa-miR-4 ZBTB10   | 1 | 1 | 1 | 3 |
| hsa-miR-1 YWHAZ    | 1 | 1 | 1 | 3 |
| hsa-miR-1 YWHAQ    | 1 | 1 | 1 | 3 |
| hsa-miR-4 YWHAQ    | 1 | 1 | 1 | 3 |
| hsa-miR-4 YWHAH    | 1 | 1 | 1 | 3 |
| hsa-miR-5 YTHDF3   | 1 | 1 | 1 | 3 |
| hsa-miR-5 YTHDF3   | 1 | 1 | 1 | 3 |
| hsa-miR-4 YTHDC1   | 1 | 1 | 1 | 3 |
| hsa-let-7c YOD1    | 1 | 1 | 1 | 3 |
| hsa-miR-4 YIPF6    | 1 | 1 | 1 | 3 |
| hsa-miR-8 XPO4     | 1 | 1 | 1 | 3 |
| hsa-miR-1 XPNPEP3  | 1 | 1 | 1 | 3 |
| hsa-miR-2 WWC3     | 1 | 1 | 1 | 3 |
| hsa-miR-4 WNK3     | 1 | 1 | 1 | 3 |
| hsa-miR-4 WIPI2    | 1 | 1 | 1 | 3 |
| hsa-miR-4 WEE1     | 1 | 1 | 1 | 3 |
| hsa-miR-1 WEE1     | 1 | 1 | 1 | 3 |
| hsa-miR-3 WEE1     | 1 | 1 | 1 | 3 |
| hsa-miR-2 WDR26    | 1 | 1 | 1 | 3 |
| hsa-miR-2 WASL     | 1 | 1 | 1 | 3 |
| hsa-miR-1 VPS4B    | 1 | 1 | 1 | 3 |
| hsa-miR-4 VPS4A    | 1 | 1 | 1 | 3 |
| hsa-miR-4 VMA21    | 1 | 1 | 1 | 3 |
| hsa-miR-1 VKORC1L1 | 1 | 1 | 1 | 3 |
| hsa-miR-5 VGLL4    | 1 | 1 | 1 | 3 |
| hsa-miR-5 VGLL4    | 1 | 1 | 1 | 3 |
| hsa-miR-3 VEGFA    | 1 | 1 | 1 | 3 |
| hsa-miR-2 VEGFA    | 1 | 1 | 1 | 3 |
| hsa-miR-4 VEGFA    | 1 | 1 | 1 | 3 |
| hsa-miR-2 VEGFA    | 1 | 1 | 1 | 3 |
| hsa-miR-1 VDR      | 1 | 1 | 1 | 3 |
| hsa-miR-1 UTRN     | 1 | 1 | 1 | 3 |
| hsa-miR-1 UST      | 1 | 1 | 1 | 3 |
| hsa-miR-1 USP6NL   | 1 | 1 | 1 | 3 |
| hsa-miR-1 USP6NL   | 1 | 1 | 1 | 3 |
| hsa-miR-2 USP47    | 1 | 1 | 1 | 3 |
| hsa-miR-4 USP42    | 1 | 1 | 1 | 3 |
| hsa-let-7c USP38   | 1 | 1 | 1 | 3 |
| hsa-miR-1 USP33    | 1 | 1 | 1 | 3 |
| hsa-miR-4 USP15    | 1 | 1 | 1 | 3 |
| hsa-miR-1 USP14    | 1 | 1 | 1 | 3 |
| hsa-miR-5 UNKL     | 1 | 1 | 1 | 3 |
| hsa-miR-1 UNC5D    | 1 | 1 | 1 | 3 |
| hsa-miR-4 UNC5D    | 1 | 1 | 1 | 3 |
| hsa-miR-8 UNC119B  | 1 | 1 | 1 | 3 |
| hsa-miR-1 UNC119B  | 1 | 1 | 1 | 3 |
| hsa-miR-1 ULK3     | 1 | 1 | 1 | 3 |
| hsa-miR-1 UHMK1    | 1 | 1 | 1 | 3 |
| hsa-miR-1 UHMK1    | 1 | 1 | 1 | 3 |
| hsa-miR-1 UBR7     | 1 | 1 | 1 | 3 |
| hsa-miR-4 UBR3     | 1 | 1 | 1 | 3 |
| hsa-miR-4 UBN2     | 1 | 1 | 1 | 3 |
| hsa-miR-1 UBN2     | 1 | 1 | 1 | 3 |
| hsa-miR-5 UBE4A    | 1 | 1 | 1 | 3 |
| hsa-miR-4 UBE2V1   | 1 | 1 | 1 | 3 |
| hsa-miR-4 UBE2Q1   | 1 | 1 | 1 | 3 |
| hsa-miR-1 UBE2A    | 1 | 1 | 1 | 3 |

|                    |   |   |   |   |
|--------------------|---|---|---|---|
| hsa-miR-2 U2SURP   | 1 | 1 | 1 | 3 |
| hsa-miR-1 TWF1     | 1 | 1 | 1 | 3 |
| hsa-miR-2 TUBB2A   | 1 | 1 | 1 | 3 |
| hsa-miR-3 TTC28    | 1 | 1 | 1 | 3 |
| hsa-miR-1 TSPAN4   | 1 | 1 | 1 | 3 |
| hsa-let-7c TRIM71  | 1 | 1 | 1 | 3 |
| hsa-miR-1 TRIM71   | 1 | 1 | 1 | 3 |
| hsa-miR-4 TRIM35   | 1 | 1 | 1 | 3 |
| hsa-miR-1 TRIM2    | 1 | 1 | 1 | 3 |
| hsa-miR-1 TRIM2    | 1 | 1 | 1 | 3 |
| hsa-miR-9 TRIB2    | 1 | 1 | 1 | 3 |
| hsa-miR-3 TRAPPC6B | 1 | 1 | 1 | 3 |
| hsa-miR-1 TRAPPC3  | 1 | 1 | 1 | 3 |
| hsa-miR-4 TRAK1    | 1 | 1 | 1 | 3 |
| hsa-miR-1 TRA2B    | 1 | 1 | 1 | 3 |
| hsa-miR-2 TPPP     | 1 | 1 | 1 | 3 |
| hsa-miR-1 TPM3     | 1 | 1 | 1 | 3 |
| hsa-miR-4 TPM2     | 1 | 1 | 1 | 3 |
| hsa-miR-1 TP53INP2 | 1 | 1 | 1 | 3 |
| hsa-miR-1 TP53INP1 | 1 | 1 | 1 | 3 |
| hsa-miR-1 TOR2A    | 1 | 1 | 1 | 3 |
| hsa-miR-8 TOR1B    | 1 | 1 | 1 | 3 |
| hsa-miR-4 TNRC6B   | 1 | 1 | 1 | 3 |
| hsa-miR-1 TNPO1    | 1 | 1 | 1 | 3 |
| hsa-miR-1 TNPO1    | 1 | 1 | 1 | 3 |
| hsa-miR-2 TMTC3    | 1 | 1 | 1 | 3 |
| hsa-miR-2 TMTC2    | 1 | 1 | 1 | 3 |
| hsa-miR-1 TMSB4X   | 1 | 1 | 1 | 3 |
| hsa-miR-1 TMEM9B   | 1 | 1 | 1 | 3 |
| hsa-miR-1 TMEM68   | 1 | 1 | 1 | 3 |
| hsa-miR-8 TMEM2    | 1 | 1 | 1 | 3 |
| hsa-miR-1 TMEM170f | 1 | 1 | 1 | 3 |
| hsa-miR-5 TMEM161f | 1 | 1 | 1 | 3 |
| hsa-miR-5 TMEM161f | 1 | 1 | 1 | 3 |
| hsa-miR-4 TMEM161f | 1 | 1 | 1 | 3 |
| hsa-miR-1 TMEM136  | 1 | 1 | 1 | 3 |
| hsa-miR-2 TMEM132/ | 1 | 1 | 1 | 3 |
| hsa-miR-3 TMEM127  | 1 | 1 | 1 | 3 |
| hsa-miR-4 TMEM100  | 1 | 1 | 1 | 3 |
| hsa-let-7c TMED5   | 1 | 1 | 1 | 3 |
| hsa-miR-1 TMED5    | 1 | 1 | 1 | 3 |
| hsa-miR-1 TMCC1    | 1 | 1 | 1 | 3 |
| hsa-miR-4 TLK1     | 1 | 1 | 1 | 3 |
| hsa-miR-1 TKT      | 1 | 1 | 1 | 3 |
| hsa-miR-1 TIRAP    | 1 | 1 | 1 | 3 |
| hsa-miR-1 TIAM1    | 1 | 1 | 1 | 3 |
| hsa-miR-3 THRB     | 1 | 1 | 1 | 3 |
| hsa-miR-2 THRB     | 1 | 1 | 1 | 3 |
| hsa-miR-1 THRA     | 1 | 1 | 1 | 3 |
| hsa-miR-1 THBS1    | 1 | 1 | 1 | 3 |
| hsa-let-7c TGFBR3  | 1 | 1 | 1 | 3 |
| hsa-miR-1 TGFBR3   | 1 | 1 | 1 | 3 |
| hsa-miR-4 TGFBR3   | 1 | 1 | 1 | 3 |
| hsa-miR-2 TGFBR2   | 1 | 1 | 1 | 3 |
| hsa-miR-1 TGFBR2   | 1 | 1 | 1 | 3 |
| hsa-let-7c TGFBR1  | 1 | 1 | 1 | 3 |
| hsa-miR-1 TGFBR1   | 1 | 1 | 1 | 3 |
| hsa-miR-1 TFDP1    | 1 | 1 | 1 | 3 |

|                   |   |   |   |   |
|-------------------|---|---|---|---|
| hsa-miR-1 TFAP2C  | 1 | 1 | 1 | 3 |
| hsa-miR-2 TET3    | 1 | 1 | 1 | 3 |
| hsa-miR-2 TET2    | 1 | 1 | 1 | 3 |
| hsa-miR-1 TET2    | 1 | 1 | 1 | 3 |
| hsa-miR-3 TES     | 1 | 1 | 1 | 3 |
| hsa-miR-1 TERF2   | 1 | 1 | 1 | 3 |
| hsa-miR-1 TEF     | 1 | 1 | 1 | 3 |
| hsa-miR-1 TEAD1   | 1 | 1 | 1 | 3 |
| hsa-miR-2 TDG     | 1 | 1 | 1 | 3 |
| hsa-miR-1 TCF12   | 1 | 1 | 1 | 3 |
| hsa-miR-2 TCF12   | 1 | 1 | 1 | 3 |
| hsa-miR-5 TBXA2R  | 1 | 1 | 1 | 3 |
| hsa-miR-5 TBR1    | 1 | 1 | 1 | 3 |
| hsa-miR-4 TBPL1   | 1 | 1 | 1 | 3 |
| hsa-miR-1 TBC1D9  | 1 | 1 | 1 | 3 |
| hsa-miR-5 TBC1D15 | 1 | 1 | 1 | 3 |
| hsa-miR-5 TBC1D15 | 1 | 1 | 1 | 3 |
| hsa-miR-1 TBC1D12 | 1 | 1 | 1 | 3 |
| hsa-miR-1 TBC1D1  | 1 | 1 | 1 | 3 |
| hsa-miR-1 TAX1BP1 | 1 | 1 | 1 | 3 |
| hsa-miR-4 TARBP2  | 1 | 1 | 1 | 3 |
| hsa-miR-4 TAOK1   | 1 | 1 | 1 | 3 |
| hsa-miR-1 TAGLN2  | 1 | 1 | 1 | 3 |
| hsa-miR-1 TAGLN2  | 1 | 1 | 1 | 3 |
| hsa-miR-5 TAF8    | 1 | 1 | 1 | 3 |
| hsa-miR-4 SYPL1   | 1 | 1 | 1 | 3 |
| hsa-miR-4 SYNRG   | 1 | 1 | 1 | 3 |
| hsa-miR-2 SYNJ2BP | 1 | 1 | 1 | 3 |
| hsa-miR-1 SUZ12   | 1 | 1 | 1 | 3 |
| hsa-miR-1 SUSD1   | 1 | 1 | 1 | 3 |
| hsa-miR-1 SUPT16H | 1 | 1 | 1 | 3 |
| hsa-miR-5 SUN2    | 1 | 1 | 1 | 3 |
| hsa-miR-1 SUB1    | 1 | 1 | 1 | 3 |
| hsa-miR-2 STX16   | 1 | 1 | 1 | 3 |
| hsa-miR-4 STRADB  | 1 | 1 | 1 | 3 |
| hsa-miR-1 STON2   | 1 | 1 | 1 | 3 |
| hsa-miR-1 STMN1   | 1 | 1 | 1 | 3 |
| hsa-miR-2 STK4    | 1 | 1 | 1 | 3 |
| hsa-miR-4 STK38   | 1 | 1 | 1 | 3 |
| hsa-miR-1 STAT3   | 1 | 1 | 1 | 3 |
| hsa-miR-1 STARD13 | 1 | 1 | 1 | 3 |
| hsa-miR-1 STAMBP  | 1 | 1 | 1 | 3 |
| hsa-miR-1 STAMBP  | 1 | 1 | 1 | 3 |
| hsa-miR-3 SSTR3   | 1 | 1 | 1 | 3 |
| hsa-miR-4 SSRP1   | 1 | 1 | 1 | 3 |
| hsa-miR-8 SSR2    | 1 | 1 | 1 | 3 |
| hsa-miR-1 SRSF9   | 1 | 1 | 1 | 3 |
| hsa-miR-3 SRSF2   | 1 | 1 | 1 | 3 |
| hsa-miR-3 SRSF2   | 1 | 1 | 1 | 3 |
| hsa-miR-5 SRSF11  | 1 | 1 | 1 | 3 |
| hsa-miR-5 SRSF1   | 1 | 1 | 1 | 3 |
| hsa-miR-4 SRPRB   | 1 | 1 | 1 | 3 |
| hsa-miR-1 SRI     | 1 | 1 | 1 | 3 |
| hsa-miR-1 SRGAP1  | 1 | 1 | 1 | 3 |
| hsa-miR-4 SREK1   | 1 | 1 | 1 | 3 |
| hsa-miR-1 SPRY4   | 1 | 1 | 1 | 3 |
| hsa-miR-4 SPRY1   | 1 | 1 | 1 | 3 |
| hsa-miR-1 SPRED1  | 1 | 1 | 1 | 3 |



|                    |   |   |   |   |
|--------------------|---|---|---|---|
| hsa-miR-4 SPRED1   | 1 | 1 | 1 | 3 |
| hsa-miR-2 SPOP     | 1 | 1 | 1 | 3 |
| hsa-miR-1 SPATA2   | 1 | 1 | 1 | 3 |
| hsa-miR-2 SP1      | 1 | 1 | 1 | 3 |
| hsa-miR-1 SOX9     | 1 | 1 | 1 | 3 |
| hsa-miR-1 SOX4     | 1 | 1 | 1 | 3 |
| hsa-miR-2 SOX4     | 1 | 1 | 1 | 3 |
| hsa-miR-4 SOWAHC   | 1 | 1 | 1 | 3 |
| hsa-miR-1 SORBS2   | 1 | 1 | 1 | 3 |
| hsa-miR-1 SON      | 1 | 1 | 1 | 3 |
| hsa-miR-4 SOCS6    | 1 | 1 | 1 | 3 |
| hsa-let-7c SOCS1   | 1 | 1 | 1 | 3 |
| hsa-miR-2 SNX24    | 1 | 1 | 1 | 3 |
| hsa-miR-4 SNX16    | 1 | 1 | 1 | 3 |
| hsa-miR-4 SNRPB2   | 1 | 1 | 1 | 3 |
| hsa-miR-4 SMURF1   | 1 | 1 | 1 | 3 |
| hsa-miR-1 SMIM14   | 1 | 1 | 1 | 3 |
| hsa-miR-1 SMG1     | 1 | 1 | 1 | 3 |
| hsa-let-7c SMCR8   | 1 | 1 | 1 | 3 |
| hsa-let-7c SMC1A   | 1 | 1 | 1 | 3 |
| hsa-miR-1 SMARCD1  | 1 | 1 | 1 | 3 |
| hsa-let-7c SMARCC1 | 1 | 1 | 1 | 3 |
| hsa-miR-1 SMARCB1  | 1 | 1 | 1 | 3 |
| hsa-let-7c SMARCAD | 1 | 1 | 1 | 3 |
| hsa-miR-9 SMARCA5  | 1 | 1 | 1 | 3 |
| hsa-miR-1 SMARCA5  | 1 | 1 | 1 | 3 |
| hsa-miR-4 SMAD7    | 1 | 1 | 1 | 3 |
| hsa-miR-1 SMAD5    | 1 | 1 | 1 | 3 |
| hsa-miR-1 SMAD3    | 1 | 1 | 1 | 3 |
| hsa-miR-1 SLC8A1   | 1 | 1 | 1 | 3 |
| hsa-miR-1 SLC7A6   | 1 | 1 | 1 | 3 |
| hsa-miR-1 SLC7A1   | 1 | 1 | 1 | 3 |
| hsa-miR-3 SLC6A8   | 1 | 1 | 1 | 3 |
| hsa-let-7c SLC5A6  | 1 | 1 | 1 | 3 |
| hsa-miR-3 SLC5A6   | 1 | 1 | 1 | 3 |
| hsa-miR-5 SLC4A2   | 1 | 1 | 1 | 3 |
| hsa-miR-1 SLC44A1  | 1 | 1 | 1 | 3 |
| hsa-miR-2 SLC43A1  | 1 | 1 | 1 | 3 |
| hsa-miR-4 SLC39A9  | 1 | 1 | 1 | 3 |
| hsa-miR-2 SLC39A9  | 1 | 1 | 1 | 3 |
| hsa-miR-1 SLC39A6  | 1 | 1 | 1 | 3 |
| hsa-miR-1 SLC38A2  | 1 | 1 | 1 | 3 |
| hsa-miR-1 SLC36A1  | 1 | 1 | 1 | 3 |
| hsa-miR-1 SLC35A4  | 1 | 1 | 1 | 3 |
| hsa-miR-2 SLC2A14  | 1 | 1 | 1 | 3 |
| hsa-miR-3 SLC2A13  | 1 | 1 | 1 | 3 |
| hsa-miR-1 SLC25A30 | 1 | 1 | 1 | 3 |
| hsa-miR-1 SLC25A22 | 1 | 1 | 1 | 3 |
| hsa-miR-4 SLC25A12 | 1 | 1 | 1 | 3 |
| hsa-miR-1 SLC24A4  | 1 | 1 | 1 | 3 |
| hsa-miR-2 SLC22A6  | 1 | 1 | 1 | 3 |
| hsa-miR-3 SLC20A1  | 1 | 1 | 1 | 3 |
| hsa-let-7c SLC20A1 | 1 | 1 | 1 | 3 |
| hsa-miR-1 SLC1A4   | 1 | 1 | 1 | 3 |
| hsa-miR-6 SLC16A1  | 1 | 1 | 1 | 3 |
| hsa-miR-2 SLC16A1  | 1 | 1 | 1 | 3 |
| hsa-let-7c SLC10A7 | 1 | 1 | 1 | 3 |
| hsa-miR-4 SLBP     | 1 | 1 | 1 | 3 |

|                     |   |   |   |   |
|---------------------|---|---|---|---|
| hsa-miR-1 SLBP      | 1 | 1 | 1 | 3 |
| hsa-miR-5 SKIDA1    | 1 | 1 | 1 | 3 |
| hsa-miR-4 SKI       | 1 | 1 | 1 | 3 |
| hsa-miR-1 SIX4      | 1 | 1 | 1 | 3 |
| hsa-miR-1 SIRT7     | 1 | 1 | 1 | 3 |
| hsa-miR-2 SIRT1     | 1 | 1 | 1 | 3 |
| hsa-miR-2 SIRT1     | 1 | 1 | 1 | 3 |
| hsa-miR-3 SIPA1L2   | 1 | 1 | 1 | 3 |
| hsa-miR-3 SIKE1     | 1 | 1 | 1 | 3 |
| hsa-miR-4 SIK1      | 1 | 1 | 1 | 3 |
| hsa-miR-4 SIDT2     | 1 | 1 | 1 | 3 |
| hsa-miR-4 SIAH1     | 1 | 1 | 1 | 3 |
| hsa-miR-4 SHOC2     | 1 | 1 | 1 | 3 |
| hsa-miR-5 SHE       | 1 | 1 | 1 | 3 |
| hsa-miR-2 SH3PXD2A  | 1 | 1 | 1 | 3 |
| hsa-miR-1 SH3BP5L   | 1 | 1 | 1 | 3 |
| hsa-miR-1 SH3BGRL3  | 1 | 1 | 1 | 3 |
| hsa-miR-1 SGPL1     | 1 | 1 | 1 | 3 |
| hsa-miR-2 SGPL1     | 1 | 1 | 1 | 3 |
| hsa-miR-1 SGPL1     | 1 | 1 | 1 | 3 |
| hsa-miR-2 SGK1      | 1 | 1 | 1 | 3 |
| hsa-miR-4 SF3B3     | 1 | 1 | 1 | 3 |
| hsa-miR-4 SESN3     | 1 | 1 | 1 | 3 |
| hsa-miR-1 SESN3     | 1 | 1 | 1 | 3 |
| hsa-miR-1 SERPINE1  | 1 | 1 | 1 | 3 |
| hsa-miR-1 SERPINE1  | 1 | 1 | 1 | 3 |
| hsa-miR-1 SERINC5   | 1 | 1 | 1 | 3 |
| hsa-miR-2 SERINC3   | 1 | 1 | 1 | 3 |
| hsa-miR-4 SERBP1    | 1 | 1 | 1 | 3 |
| hsa-miR-1 SEMA6A    | 1 | 1 | 1 | 3 |
| hsa-let-7c SEMA4C   | 1 | 1 | 1 | 3 |
| hsa-miR-1 SEMA4C    | 1 | 1 | 1 | 3 |
| hsa-miR-1 SECISBP2L | 1 | 1 | 1 | 3 |
| hsa-miR-6 SEC24D    | 1 | 1 | 1 | 3 |
| hsa-miR-3 SEC24A    | 1 | 1 | 1 | 3 |
| hsa-miR-4 SEC24A    | 1 | 1 | 1 | 3 |
| hsa-miR-2 SDR42E1   | 1 | 1 | 1 | 3 |
| hsa-miR-1 SDC1      | 1 | 1 | 1 | 3 |
| hsa-miR-4 SCOC      | 1 | 1 | 1 | 3 |
| hsa-miR-3 SCML2     | 1 | 1 | 1 | 3 |
| hsa-miR-1 SCARB2    | 1 | 1 | 1 | 3 |
| hsa-miR-1 SCAF11    | 1 | 1 | 1 | 3 |
| hsa-miR-1 SBNO1     | 1 | 1 | 1 | 3 |
| hsa-miR-4 SBNO1     | 1 | 1 | 1 | 3 |
| hsa-miR-4 SBNO1     | 1 | 1 | 1 | 3 |
| hsa-miR-1 SAMD8     | 1 | 1 | 1 | 3 |
| hsa-miR-2 SAMD5     | 1 | 1 | 1 | 3 |
| hsa-miR-1 SAMD10    | 1 | 1 | 1 | 3 |
| hsa-miR-4 SALL1     | 1 | 1 | 1 | 3 |
| hsa-miR-1 SACM1L    | 1 | 1 | 1 | 3 |
| hsa-miR-1 RYBP      | 1 | 1 | 1 | 3 |
| hsa-miR-1 RYBP      | 1 | 1 | 1 | 3 |
| hsa-miR-4 RYBP      | 1 | 1 | 1 | 3 |
| hsa-miR-5 RXRB      | 1 | 1 | 1 | 3 |
| hsa-miR-2 RUNX2     | 1 | 1 | 1 | 3 |
| hsa-miR-4 RUNX1T1   | 1 | 1 | 1 | 3 |
| hsa-miR-1 RTKN      | 1 | 1 | 1 | 3 |
| hsa-miR-1 RSBN1     | 1 | 1 | 1 | 3 |

|                    |   |   |   |   |
|--------------------|---|---|---|---|
| hsa-miR-4 RS1      | 1 | 1 | 1 | 3 |
| hsa-let-7c RRM2    | 1 | 1 | 1 | 3 |
| hsa-miR-1 RREB1    | 1 | 1 | 1 | 3 |
| hsa-miR-1 RREB1    | 1 | 1 | 1 | 3 |
| hsa-miR-1 RPS6KB1  | 1 | 1 | 1 | 3 |
| hsa-miR-4 RPS6KB1  | 1 | 1 | 1 | 3 |
| hsa-miR-1 RPS6KA1  | 1 | 1 | 1 | 3 |
| hsa-miR-4 RPRD2    | 1 | 1 | 1 | 3 |
| hsa-miR-5 RPL34    | 1 | 1 | 1 | 3 |
| hsa-miR-1 RORA     | 1 | 1 | 1 | 3 |
| hsa-miR-1 RORA     | 1 | 1 | 1 | 3 |
| hsa-miR-1 ROCK2    | 1 | 1 | 1 | 3 |
| hsa-miR-2 ROBO1    | 1 | 1 | 1 | 3 |
| hsa-miR-1 RNF44    | 1 | 1 | 1 | 3 |
| hsa-miR-1 RNF219   | 1 | 1 | 1 | 3 |
| hsa-miR-1 RNF219   | 1 | 1 | 1 | 3 |
| hsa-miR-2 RNF19A   | 1 | 1 | 1 | 3 |
| hsa-miR-1 RNF165   | 1 | 1 | 1 | 3 |
| hsa-miR-1 RNF138   | 1 | 1 | 1 | 3 |
| hsa-miR-2 RNF138   | 1 | 1 | 1 | 3 |
| hsa-miR-5 RNF111   | 1 | 1 | 1 | 3 |
| hsa-miR-5 RMND5A   | 1 | 1 | 1 | 3 |
| hsa-let-7c RICTOR  | 1 | 1 | 1 | 3 |
| hsa-let-7c RFX6    | 1 | 1 | 1 | 3 |
| hsa-miR-2 REST     | 1 | 1 | 1 | 3 |
| hsa-miR-1 REST     | 1 | 1 | 1 | 3 |
| hsa-miR-1 REEP1    | 1 | 1 | 1 | 3 |
| hsa-miR-4 RECK     | 1 | 1 | 1 | 3 |
| hsa-let-7c RDX     | 1 | 1 | 1 | 3 |
| hsa-miR-2 RCC2     | 1 | 1 | 1 | 3 |
| hsa-miR-4 RBPJ     | 1 | 1 | 1 | 3 |
| hsa-miR-1 RBMXL1   | 1 | 1 | 1 | 3 |
| hsa-miR-1 RBMXL1   | 1 | 1 | 1 | 3 |
| hsa-miR-1 RBM47    | 1 | 1 | 1 | 3 |
| hsa-miR-4 RBM47    | 1 | 1 | 1 | 3 |
| hsa-miR-1 RBM27    | 1 | 1 | 1 | 3 |
| hsa-miR-2 RBFOX2   | 1 | 1 | 1 | 3 |
| hsa-miR-1 RBBP6    | 1 | 1 | 1 | 3 |
| hsa-miR-4 RBBP6    | 1 | 1 | 1 | 3 |
| hsa-miR-1 RB1CC1   | 1 | 1 | 1 | 3 |
| hsa-miR-9 RAVER2   | 1 | 1 | 1 | 3 |
| hsa-miR-4 RASSF2   | 1 | 1 | 1 | 3 |
| hsa-miR-4 RASEF    | 1 | 1 | 1 | 3 |
| hsa-miR-4 RARB     | 1 | 1 | 1 | 3 |
| hsa-miR-4 RAPH1    | 1 | 1 | 1 | 3 |
| hsa-miR-1 RAP2C    | 1 | 1 | 1 | 3 |
| hsa-miR-1 RAP1B    | 1 | 1 | 1 | 3 |
| hsa-miR-1 RANBP9   | 1 | 1 | 1 | 3 |
| hsa-miR-4 RAD23B   | 1 | 1 | 1 | 3 |
| hsa-miR-1 RAC1     | 1 | 1 | 1 | 3 |
| hsa-miR-1 RABGAP1L | 1 | 1 | 1 | 3 |
| hsa-miR-5 RAB5B    | 1 | 1 | 1 | 3 |
| hsa-miR-1 RAB5A    | 1 | 1 | 1 | 3 |
| hsa-miR-2 RAB40B   | 1 | 1 | 1 | 3 |
| hsa-miR-1 RAB39B   | 1 | 1 | 1 | 3 |
| hsa-miR-2 RAB30    | 1 | 1 | 1 | 3 |
| hsa-miR-4 RAB23    | 1 | 1 | 1 | 3 |
| hsa-miR-2 RAB22A   | 1 | 1 | 1 | 3 |

|                      |   |   |   |   |
|----------------------|---|---|---|---|
| hsa-miR-1 RAB1A      | 1 | 1 | 1 | 3 |
| hsa-let-7c RAB11FIP4 | 1 | 1 | 1 | 3 |
| hsa-miR-2 RAB10      | 1 | 1 | 1 | 3 |
| hsa-miR-2 R3HDM4     | 1 | 1 | 1 | 3 |
| hsa-miR-5 QSER1      | 1 | 1 | 1 | 3 |
| hsa-miR-2 PTPRT      | 1 | 1 | 1 | 3 |
| hsa-miR-5 PTPRM      | 1 | 1 | 1 | 3 |
| hsa-miR-1 PTPRK      | 1 | 1 | 1 | 3 |
| hsa-miR-4 PTPRD      | 1 | 1 | 1 | 3 |
| hsa-miR-1 PTPN1      | 1 | 1 | 1 | 3 |
| hsa-miR-1 PTP4A2     | 1 | 1 | 1 | 3 |
| hsa-miR-2 PTP4A1     | 1 | 1 | 1 | 3 |
| hsa-miR-2 PTP4A1     | 1 | 1 | 1 | 3 |
| hsa-miR-1 PTGS2      | 1 | 1 | 1 | 3 |
| hsa-miR-2 PTEN       | 1 | 1 | 1 | 3 |
| hsa-miR-1 PTBP2      | 1 | 1 | 1 | 3 |
| hsa-miR-1 PTAR1      | 1 | 1 | 1 | 3 |
| hsa-miR-1 PSIP1      | 1 | 1 | 1 | 3 |
| hsa-miR-5 PSAT1      | 1 | 1 | 1 | 3 |
| hsa-miR-4 PSAT1      | 1 | 1 | 1 | 3 |
| hsa-let-7c PRSS22    | 1 | 1 | 1 | 3 |
| hsa-miR-5 PRRG4      | 1 | 1 | 1 | 3 |
| hsa-miR-2 PRLR       | 1 | 1 | 1 | 3 |
| hsa-miR-1 PRKCE      | 1 | 1 | 1 | 3 |
| hsa-miR-4 PRKAR2A    | 1 | 1 | 1 | 3 |
| hsa-miR-1 PRKAA1     | 1 | 1 | 1 | 3 |
| hsa-miR-1 PRKAA1     | 1 | 1 | 1 | 3 |
| hsa-miR-4 PRKAA1     | 1 | 1 | 1 | 3 |
| hsa-miR-4 PRDM4      | 1 | 1 | 1 | 3 |
| hsa-miR-2 PRDM2      | 1 | 1 | 1 | 3 |
| hsa-miR-1 PRDM2      | 1 | 1 | 1 | 3 |
| hsa-miR-1 PRDM1      | 1 | 1 | 1 | 3 |
| hsa-miR-1 PRDM1      | 1 | 1 | 1 | 3 |
| hsa-miR-2 PPP3R1     | 1 | 1 | 1 | 3 |
| hsa-miR-1 PPP3CA     | 1 | 1 | 1 | 3 |
| hsa-miR-1 PPP2R5E    | 1 | 1 | 1 | 3 |
| hsa-let-7c PPP1R15B  | 1 | 1 | 1 | 3 |
| hsa-miR-5 PPP1R15B   | 1 | 1 | 1 | 3 |
| hsa-miR-2 PPP1R13B   | 1 | 1 | 1 | 3 |
| hsa-miR-4 PPP1R11    | 1 | 1 | 1 | 3 |
| hsa-miR-2 PPM1D      | 1 | 1 | 1 | 3 |
| hsa-miR-4 PPM1A      | 1 | 1 | 1 | 3 |
| hsa-miR-4 PPIL1      | 1 | 1 | 1 | 3 |
| hsa-miR-1 PPIB       | 1 | 1 | 1 | 3 |
| hsa-miR-1 PPAT       | 1 | 1 | 1 | 3 |
| hsa-miR-3 POLR1B     | 1 | 1 | 1 | 3 |
| hsa-miR-1 POGK       | 1 | 1 | 1 | 3 |
| hsa-miR-5 PNRC1      | 1 | 1 | 1 | 3 |
| hsa-miR-5 PNRC1      | 1 | 1 | 1 | 3 |
| hsa-miR-4 PNPLA6     | 1 | 1 | 1 | 3 |
| hsa-miR-4 PNISR      | 1 | 1 | 1 | 3 |
| hsa-miR-2 PMP22      | 1 | 1 | 1 | 3 |
| hsa-let-7c PLXND1    | 1 | 1 | 1 | 3 |
| hsa-miR-4 PLRG1      | 1 | 1 | 1 | 3 |
| hsa-miR-1 PLEKHM3    | 1 | 1 | 1 | 3 |
| hsa-miR-1 PLEKHG2    | 1 | 1 | 1 | 3 |
| hsa-miR-4 PLEKHA1    | 1 | 1 | 1 | 3 |
| hsa-miR-1 PLAGL2     | 1 | 1 | 1 | 3 |

|                    |   |   |   |   |
|--------------------|---|---|---|---|
| hsa-let-7c PLAGL2  | 1 | 1 | 1 | 3 |
| hsa-miR-4 PLAG1    | 1 | 1 | 1 | 3 |
| hsa-miR-4 PITPNC1  | 1 | 1 | 1 | 3 |
| hsa-miR-4 PISD     | 1 | 1 | 1 | 3 |
| hsa-miR-1 PIP5K1C  | 1 | 1 | 1 | 3 |
| hsa-miR-4 PIM1     | 1 | 1 | 1 | 3 |
| hsa-miR-4 PIK3R1   | 1 | 1 | 1 | 3 |
| hsa-miR-1 PIK3C2B  | 1 | 1 | 1 | 3 |
| hsa-miR-2 PIGN     | 1 | 1 | 1 | 3 |
| hsa-miR-4 PHLPP2   | 1 | 1 | 1 | 3 |
| hsa-miR-4 PHKA1    | 1 | 1 | 1 | 3 |
| hsa-miR-4 PHF19    | 1 | 1 | 1 | 3 |
| hsa-miR-2 PHF13    | 1 | 1 | 1 | 3 |
| hsa-miR-4 PHC3     | 1 | 1 | 1 | 3 |
| hsa-miR-1 PHACTR2  | 1 | 1 | 1 | 3 |
| hsa-let-7c PGRMC1  | 1 | 1 | 1 | 3 |
| hsa-miR-1 PGM2     | 1 | 1 | 1 | 3 |
| hsa-miR-1 PGD      | 1 | 1 | 1 | 3 |
| hsa-miR-4 PGAM5    | 1 | 1 | 1 | 3 |
| hsa-miR-1 PFDN1    | 1 | 1 | 1 | 3 |
| hsa-miR-5 PEX26    | 1 | 1 | 1 | 3 |
| hsa-miR-5 PEX26    | 1 | 1 | 1 | 3 |
| hsa-let-7c PEX11B  | 1 | 1 | 1 | 3 |
| hsa-miR-3 PEX11B   | 1 | 1 | 1 | 3 |
| hsa-let-7c PDP2    | 1 | 1 | 1 | 3 |
| hsa-miR-4 PDIA6    | 1 | 1 | 1 | 3 |
| hsa-miR-2 PDHX     | 1 | 1 | 1 | 3 |
| hsa-miR-1 PDGFD    | 1 | 1 | 1 | 3 |
| hsa-miR-1 PDCD10   | 1 | 1 | 1 | 3 |
| hsa-miR-1 PCTP     | 1 | 1 | 1 | 3 |
| hsa-miR-5 PCNA     | 1 | 1 | 1 | 3 |
| hsa-let-7c PCGF3   | 1 | 1 | 1 | 3 |
| hsa-miR-2 PCGF2    | 1 | 1 | 1 | 3 |
| hsa-let-7c PBX3    | 1 | 1 | 1 | 3 |
| hsa-miR-1 PAX3     | 1 | 1 | 1 | 3 |
| hsa-miR-1 PARP8    | 1 | 1 | 1 | 3 |
| hsa-miR-1 PARP1    | 1 | 1 | 1 | 3 |
| hsa-miR-1 PAQR5    | 1 | 1 | 1 | 3 |
| hsa-miR-1 PAPPB    | 1 | 1 | 1 | 3 |
| hsa-miR-3 PAPOLG   | 1 | 1 | 1 | 3 |
| hsa-miR-1 PAPD7    | 1 | 1 | 1 | 3 |
| hsa-miR-1 PAPD5    | 1 | 1 | 1 | 3 |
| hsa-miR-1 PAPD4    | 1 | 1 | 1 | 3 |
| hsa-miR-4 PAFAH1B2 | 1 | 1 | 1 | 3 |
| hsa-miR-1 PABPC4L  | 1 | 1 | 1 | 3 |
| hsa-miR-1 OTUD4    | 1 | 1 | 1 | 3 |
| hsa-miR-4 OSCAR    | 1 | 1 | 1 | 3 |
| hsa-miR-1 OSBPL7   | 1 | 1 | 1 | 3 |
| hsa-miR-4 OSBPL3   | 1 | 1 | 1 | 3 |
| hsa-miR-1 OSBPL10  | 1 | 1 | 1 | 3 |
| hsa-miR-4 OGT      | 1 | 1 | 1 | 3 |
| hsa-miR-1 NXT2     | 1 | 1 | 1 | 3 |
| hsa-miR-1 NWD1     | 1 | 1 | 1 | 3 |
| hsa-miR-5 NUS1     | 1 | 1 | 1 | 3 |
| hsa-miR-5 NUS1     | 1 | 1 | 1 | 3 |
| hsa-miR-1 NUPL2    | 1 | 1 | 1 | 3 |
| hsa-miR-1 NUP98    | 1 | 1 | 1 | 3 |
| hsa-miR-1 NUP50    | 1 | 1 | 1 | 3 |

|                   |   |   |   |   |
|-------------------|---|---|---|---|
| hsa-miR-4 NUP50   | 1 | 1 | 1 | 3 |
| hsa-miR-4 NUFIP2  | 1 | 1 | 1 | 3 |
| hsa-miR-1 NUFIP2  | 1 | 1 | 1 | 3 |
| hsa-miR-3 NUFIP2  | 1 | 1 | 1 | 3 |
| hsa-miR-4 NUCKS1  | 1 | 1 | 1 | 3 |
| hsa-miR-2 NTRK2   | 1 | 1 | 1 | 3 |
| hsa-miR-1 NRP1    | 1 | 1 | 1 | 3 |
| hsa-miR-1 NRIP1   | 1 | 1 | 1 | 3 |
| hsa-miR-1 NRAS    | 1 | 1 | 1 | 3 |
| hsa-let-7c NRAS   | 1 | 1 | 1 | 3 |
| hsa-let-7c NR6A1  | 1 | 1 | 1 | 3 |
| hsa-miR-1 NR5A2   | 1 | 1 | 1 | 3 |
| hsa-miR-1 NR4A3   | 1 | 1 | 1 | 3 |
| hsa-miR-1 NR2C2   | 1 | 1 | 1 | 3 |
| hsa-miR-2 NPTX1   | 1 | 1 | 1 | 3 |
| hsa-miR-1 NPTN    | 1 | 1 | 1 | 3 |
| hsa-miR-1 NOTCH2  | 1 | 1 | 1 | 3 |
| hsa-miR-4 NOTCH2  | 1 | 1 | 1 | 3 |
| hsa-miR-3 NOC3L   | 1 | 1 | 1 | 3 |
| hsa-let-7c NME4   | 1 | 1 | 1 | 3 |
| hsa-miR-1 NLK     | 1 | 1 | 1 | 3 |
| hsa-miR-2 NHLRC3  | 1 | 1 | 1 | 3 |
| hsa-let-7c NHLRC3 | 1 | 1 | 1 | 3 |
| hsa-miR-3 NHLRC3  | 1 | 1 | 1 | 3 |
| hsa-miR-1 NFYA    | 1 | 1 | 1 | 3 |
| hsa-miR-1 NETO2   | 1 | 1 | 1 | 3 |
| hsa-miR-1 NEK7    | 1 | 1 | 1 | 3 |
| hsa-miR-1 NEDD9   | 1 | 1 | 1 | 3 |
| hsa-miR-1 NCOR2   | 1 | 1 | 1 | 3 |
| hsa-miR-1 NCOR2   | 1 | 1 | 1 | 3 |
| hsa-miR-1 NCOA6   | 1 | 1 | 1 | 3 |
| hsa-miR-3 NCMAP   | 1 | 1 | 1 | 3 |
| hsa-miR-4 NAPG    | 1 | 1 | 1 | 3 |
| hsa-miR-3 NAP1L5  | 1 | 1 | 1 | 3 |
| hsa-miR-2 NAP1L1  | 1 | 1 | 1 | 3 |
| hsa-let-7c NAP1L1 | 1 | 1 | 1 | 3 |
| hsa-miR-1 NANOGNE | 1 | 1 | 1 | 3 |
| hsa-miR-1 NACA2   | 1 | 1 | 1 | 3 |
| hsa-miR-1 NACA    | 1 | 1 | 1 | 3 |
| hsa-miR-2 NAA40   | 1 | 1 | 1 | 3 |
| hsa-let-7c NAA30  | 1 | 1 | 1 | 3 |
| hsa-miR-4 N4BP1   | 1 | 1 | 1 | 3 |
| hsa-miR-1 N4BP1   | 1 | 1 | 1 | 3 |
| hsa-miR-1 MYRF    | 1 | 1 | 1 | 3 |
| hsa-miR-1 MYOCD   | 1 | 1 | 1 | 3 |
| hsa-miR-1 MYO6    | 1 | 1 | 1 | 3 |
| hsa-miR-1 MYO6    | 1 | 1 | 1 | 3 |
| hsa-miR-4 MYO5A   | 1 | 1 | 1 | 3 |
| hsa-miR-1 MYO5A   | 1 | 1 | 1 | 3 |
| hsa-miR-5 MYLIP   | 1 | 1 | 1 | 3 |
| hsa-miR-1 MYLIP   | 1 | 1 | 1 | 3 |
| hsa-miR-2 MYCN    | 1 | 1 | 1 | 3 |
| hsa-miR-1 MYCN    | 1 | 1 | 1 | 3 |
| hsa-miR-2 MYCN    | 1 | 1 | 1 | 3 |
| hsa-miR-4 MYB     | 1 | 1 | 1 | 3 |
| hsa-let-7c MXD1   | 1 | 1 | 1 | 3 |
| hsa-miR-2 MXD1    | 1 | 1 | 1 | 3 |
| hsa-let-7c MTUS1  | 1 | 1 | 1 | 3 |

|                    |   |   |   |   |
|--------------------|---|---|---|---|
| hsa-miR-1 MTSS1L   | 1 | 1 | 1 | 3 |
| hsa-miR-9 MTOR     | 1 | 1 | 1 | 3 |
| hsa-miR-1 MTOR     | 1 | 1 | 1 | 3 |
| hsa-miR-9 MTMR3    | 1 | 1 | 1 | 3 |
| hsa-miR-4 MTMR3    | 1 | 1 | 1 | 3 |
| hsa-miR-4 MTHFR    | 1 | 1 | 1 | 3 |
| hsa-miR-4 MTFR1L   | 1 | 1 | 1 | 3 |
| hsa-miR-1 MTF1     | 1 | 1 | 1 | 3 |
| hsa-miR-3 MSANTD4  | 1 | 1 | 1 | 3 |
| hsa-miR-2 MRPS27   | 1 | 1 | 1 | 3 |
| hsa-miR-1 MRPL42   | 1 | 1 | 1 | 3 |
| hsa-miR-1 MRGBP    | 1 | 1 | 1 | 3 |
| hsa-miR-1 MPPE1    | 1 | 1 | 1 | 3 |
| hsa-miR-2 MORF4L1  | 1 | 1 | 1 | 3 |
| hsa-miR-1 MON2     | 1 | 1 | 1 | 3 |
| hsa-miR-4 MOB4     | 1 | 1 | 1 | 3 |
| hsa-miR-1 MOB4     | 1 | 1 | 1 | 3 |
| hsa-miR-1 MNX1     | 1 | 1 | 1 | 3 |
| hsa-miR-1 MMD      | 1 | 1 | 1 | 3 |
| hsa-miR-4 MLLT6    | 1 | 1 | 1 | 3 |
| hsa-miR-1 MLEC     | 1 | 1 | 1 | 3 |
| hsa-miR-4 MKX      | 1 | 1 | 1 | 3 |
| hsa-miR-1 MKNK2    | 1 | 1 | 1 | 3 |
| hsa-miR-1 MFSD6    | 1 | 1 | 1 | 3 |
| hsa-miR-1 MFHAS1   | 1 | 1 | 1 | 3 |
| hsa-miR-1 MEST     | 1 | 1 | 1 | 3 |
| hsa-let-7c MDM4    | 1 | 1 | 1 | 3 |
| hsa-miR-1 MDM2     | 1 | 1 | 1 | 3 |
| hsa-miR-6 MDM2     | 1 | 1 | 1 | 3 |
| hsa-miR-1 MCL1     | 1 | 1 | 1 | 3 |
| hsa-miR-2 MCL1     | 1 | 1 | 1 | 3 |
| hsa-miR-2 MBNL1    | 1 | 1 | 1 | 3 |
| hsa-miR-1 MBNL1    | 1 | 1 | 1 | 3 |
| hsa-let-7c MBD2    | 1 | 1 | 1 | 3 |
| hsa-miR-1 MATR3    | 1 | 1 | 1 | 3 |
| hsa-miR-1 MAT2A    | 1 | 1 | 1 | 3 |
| hsa-miR-3 MAPT     | 1 | 1 | 1 | 3 |
| hsa-miR-2 MAPRE2   | 1 | 1 | 1 | 3 |
| hsa-miR-1 MAPRE1   | 1 | 1 | 1 | 3 |
| hsa-miR-2 MAPKBP1  | 1 | 1 | 1 | 3 |
| hsa-miR-3 MAPK9    | 1 | 1 | 1 | 3 |
| hsa-miR-5 MAPK8    | 1 | 1 | 1 | 3 |
| hsa-miR-1 MAPK7    | 1 | 1 | 1 | 3 |
| hsa-let-7c MAPK6   | 1 | 1 | 1 | 3 |
| hsa-let-7c MAP4K3  | 1 | 1 | 1 | 3 |
| hsa-miR-1 MAP3K7   | 1 | 1 | 1 | 3 |
| hsa-miR-1 MAP3K3   | 1 | 1 | 1 | 3 |
| hsa-miR-5 MAP3K1   | 1 | 1 | 1 | 3 |
| hsa-miR-4 MAP2K1   | 1 | 1 | 1 | 3 |
| hsa-miR-2 MAP1LC3E | 1 | 1 | 1 | 3 |
| hsa-miR-1 MAP10    | 1 | 1 | 1 | 3 |
| hsa-miR-1 MAML3    | 1 | 1 | 1 | 3 |
| hsa-miR-2 M6PR     | 1 | 1 | 1 | 3 |
| hsa-miR-4 LUZP1    | 1 | 1 | 1 | 3 |
| hsa-miR-8 LUZP1    | 1 | 1 | 1 | 3 |
| hsa-miR-3 LURAP1L  | 1 | 1 | 1 | 3 |
| hsa-miR-4 LURAP1L  | 1 | 1 | 1 | 3 |
| hsa-miR-4 LSM11    | 1 | 1 | 1 | 3 |

|                     |   |   |   |   |
|---------------------|---|---|---|---|
| hsa-miR-4 LRRFIP2   | 1 | 1 | 1 | 3 |
| hsa-miR-1 LRRC8A    | 1 | 1 | 1 | 3 |
| hsa-miR-1 LRRC59    | 1 | 1 | 1 | 3 |
| hsa-miR-1 LRRC2     | 1 | 1 | 1 | 3 |
| hsa-miR-1 LRRC2     | 1 | 1 | 1 | 3 |
| hsa-miR-2 LRP6      | 1 | 1 | 1 | 3 |
| hsa-let-7c LRIG3    | 1 | 1 | 1 | 3 |
| hsa-miR-4 LRIG2     | 1 | 1 | 1 | 3 |
| hsa-miR-1 LRCH2     | 1 | 1 | 1 | 3 |
| hsa-miR-2 LOX       | 1 | 1 | 1 | 3 |
| hsa-miR-1 LMNB1     | 1 | 1 | 1 | 3 |
| hsa-miR-1 LIX1L     | 1 | 1 | 1 | 3 |
| hsa-miR-1 LIPA      | 1 | 1 | 1 | 3 |
| hsa-miR-1 LIN7C     | 1 | 1 | 1 | 3 |
| hsa-miR-2 LIN52     | 1 | 1 | 1 | 3 |
| hsa-miR-3 LIN28B    | 1 | 1 | 1 | 3 |
| hsa-miR-1 LIN28B    | 1 | 1 | 1 | 3 |
| hsa-miR-1 LIN28A    | 1 | 1 | 1 | 3 |
| hsa-miR-2 LIMS1     | 1 | 1 | 1 | 3 |
| hsa-miR-5 LIMS1     | 1 | 1 | 1 | 3 |
| hsa-miR-1 LIMS1     | 1 | 1 | 1 | 3 |
| hsa-let-7c LIMD2    | 1 | 1 | 1 | 3 |
| hsa-miR-1 LEFTY1    | 1 | 1 | 1 | 3 |
| hsa-miR-4 LDLR      | 1 | 1 | 1 | 3 |
| hsa-miR-1 LCOR      | 1 | 1 | 1 | 3 |
| hsa-miR-5 LCOR      | 1 | 1 | 1 | 3 |
| hsa-miR-1 LCOR      | 1 | 1 | 1 | 3 |
| hsa-miR-1 LASP1     | 1 | 1 | 1 | 3 |
| hsa-miR-2 LAMC1     | 1 | 1 | 1 | 3 |
| hsa-miR-4 LAMC1     | 1 | 1 | 1 | 3 |
| hsa-miR-1 KRAS      | 1 | 1 | 1 | 3 |
| hsa-miR-3 KPNA6     | 1 | 1 | 1 | 3 |
| hsa-miR-4 KPNA1     | 1 | 1 | 1 | 3 |
| hsa-let-7c KMT2D    | 1 | 1 | 1 | 3 |
| hsa-miR-1 KLHL5     | 1 | 1 | 1 | 3 |
| hsa-miR-2 KLHL40    | 1 | 1 | 1 | 3 |
| hsa-miR-2 KLHL28    | 1 | 1 | 1 | 3 |
| hsa-miR-5 KLHL15    | 1 | 1 | 1 | 3 |
| hsa-let-7c KLHDC8B  | 1 | 1 | 1 | 3 |
| hsa-miR-2 KLHDC3    | 1 | 1 | 1 | 3 |
| hsa-miR-1 KLF6      | 1 | 1 | 1 | 3 |
| hsa-miR-1 KLF5      | 1 | 1 | 1 | 3 |
| hsa-miR-1 KLF13     | 1 | 1 | 1 | 3 |
| hsa-miR-5 KLF10     | 1 | 1 | 1 | 3 |
| hsa-miR-5 KLF10     | 1 | 1 | 1 | 3 |
| hsa-miR-1 KIF2A     | 1 | 1 | 1 | 3 |
| hsa-miR-4 KIF23     | 1 | 1 | 1 | 3 |
| hsa-miR-1 KIF21A    | 1 | 1 | 1 | 3 |
| hsa-miR-1 KIAA1586  | 1 | 1 | 1 | 3 |
| hsa-miR-2 KIAA1549  | 1 | 1 | 1 | 3 |
| hsa-miR-1 KIAA1462  | 1 | 1 | 1 | 3 |
| hsa-miR-8 KIAA1462  | 1 | 1 | 1 | 3 |
| hsa-let-7c KIAA0930 | 1 | 1 | 1 | 3 |
| hsa-miR-4 KIAA0930  | 1 | 1 | 1 | 3 |
| hsa-miR-1 KIAA0040  | 1 | 1 | 1 | 3 |
| hsa-miR-1 KDM6B     | 1 | 1 | 1 | 3 |
| hsa-miR-2 KDM5B     | 1 | 1 | 1 | 3 |
| hsa-miR-1 KDM3B     | 1 | 1 | 1 | 3 |



|                    |   |   |   |   |
|--------------------|---|---|---|---|
| hsa-let-7c KCTD21  | 1 | 1 | 1 | 3 |
| hsa-miR-2 KCTD15   | 1 | 1 | 1 | 3 |
| hsa-miR-1 KCNS3    | 1 | 1 | 1 | 3 |
| hsa-miR-4 KCNIP3   | 1 | 1 | 1 | 3 |
| hsa-miR-5 KCNB1    | 1 | 1 | 1 | 3 |
| hsa-miR-1 KBTBD8   | 1 | 1 | 1 | 3 |
| hsa-miR-9 KBTBD8   | 1 | 1 | 1 | 3 |
| hsa-miR-1 KBTBD2   | 1 | 1 | 1 | 3 |
| hsa-miR-1 KAT7     | 1 | 1 | 1 | 3 |
| hsa-miR-1 KAT6B    | 1 | 1 | 1 | 3 |
| hsa-miR-1 KANK4    | 1 | 1 | 1 | 3 |
| hsa-miR-1 JUN      | 1 | 1 | 1 | 3 |
| hsa-miR-5 JAZF1    | 1 | 1 | 1 | 3 |
| hsa-miR-2 JARID2   | 1 | 1 | 1 | 3 |
| hsa-miR-4 JARID2   | 1 | 1 | 1 | 3 |
| hsa-miR-4 IVNS1ABP | 1 | 1 | 1 | 3 |
| hsa-miR-1 IVNS1ABP | 1 | 1 | 1 | 3 |
| hsa-miR-2 ITPR1    | 1 | 1 | 1 | 3 |
| hsa-miR-4 ITPR1    | 1 | 1 | 1 | 3 |
| hsa-miR-1 ITGB8    | 1 | 1 | 1 | 3 |
| hsa-let-7c ITGB3   | 1 | 1 | 1 | 3 |
| hsa-miR-4 ITGA2    | 1 | 1 | 1 | 3 |
| hsa-miR-1 IRS1     | 1 | 1 | 1 | 3 |
| hsa-miR-1 IRF4     | 1 | 1 | 1 | 3 |
| hsa-miR-3 IRF1     | 1 | 1 | 1 | 3 |
| hsa-miR-4 IPPK     | 1 | 1 | 1 | 3 |
| hsa-miR-3 INSIG1   | 1 | 1 | 1 | 3 |
| hsa-miR-2 INSIG1   | 1 | 1 | 1 | 3 |
| hsa-miR-5 INSIG1   | 1 | 1 | 1 | 3 |
| hsa-miR-1 INO80D   | 1 | 1 | 1 | 3 |
| hsa-miR-5 IMPAD1   | 1 | 1 | 1 | 3 |
| hsa-miR-5 ILK      | 1 | 1 | 1 | 3 |
| hsa-miR-1 IL6R     | 1 | 1 | 1 | 3 |
| hsa-miR-2 IL11     | 1 | 1 | 1 | 3 |
| hsa-miR-1 IKZF4    | 1 | 1 | 1 | 3 |
| hsa-miR-2 IKZF2    | 1 | 1 | 1 | 3 |
| hsa-miR-1 IGFBP5   | 1 | 1 | 1 | 3 |
| hsa-let-7c IGF2BP3 | 1 | 1 | 1 | 3 |
| hsa-let-7c IGF2BP1 | 1 | 1 | 1 | 3 |
| hsa-miR-1 IGF1R    | 1 | 1 | 1 | 3 |
| hsa-let-7c IGF1R   | 1 | 1 | 1 | 3 |
| hsa-let-7c IGDCC4  | 1 | 1 | 1 | 3 |
| hsa-miR-5 IGBP1    | 1 | 1 | 1 | 3 |
| hsa-miR-1 IFT52    | 1 | 1 | 1 | 3 |
| hsa-miR-5 ID2      | 1 | 1 | 1 | 3 |
| hsa-miR-5 ICMT     | 1 | 1 | 1 | 3 |
| hsa-miR-1 ICK      | 1 | 1 | 1 | 3 |
| hsa-miR-4 IARS     | 1 | 1 | 1 | 3 |
| hsa-miR-1 HSPE1-MC | 1 | 1 | 1 | 3 |
| hsa-miR-4 HSPE1-MC | 1 | 1 | 1 | 3 |
| hsa-miR-1 HSPD1    | 1 | 1 | 1 | 3 |
| hsa-miR-4 HSPA4L   | 1 | 1 | 1 | 3 |
| hsa-miR-4 HSPA1B   | 1 | 1 | 1 | 3 |
| hsa-miR-3 HSPA13   | 1 | 1 | 1 | 3 |
| hsa-miR-4 HSPA13   | 1 | 1 | 1 | 3 |
| hsa-miR-1 HSP90B1  | 1 | 1 | 1 | 3 |
| hsa-miR-1 HSD17B11 | 1 | 1 | 1 | 3 |
| hsa-miR-1 HS3ST2   | 1 | 1 | 1 | 3 |

|                   |   |   |   |   |
|-------------------|---|---|---|---|
| hsa-let-7c HOXD1  | 1 | 1 | 1 | 3 |
| hsa-miR-2 HOXC8   | 1 | 1 | 1 | 3 |
| hsa-miR-4 HOXA3   | 1 | 1 | 1 | 3 |
| hsa-miR-4 HOXA10  | 1 | 1 | 1 | 3 |
| hsa-miR-1 HOOK1   | 1 | 1 | 1 | 3 |
| hsa-miR-1 HNRNPU  | 1 | 1 | 1 | 3 |
| hsa-miR-1 HNRNPF  | 1 | 1 | 1 | 3 |
| hsa-miR-1 HNRNPF  | 1 | 1 | 1 | 3 |
| hsa-miR-2 HNRNPC  | 1 | 1 | 1 | 3 |
| hsa-miR-1 HNRNPA3 | 1 | 1 | 1 | 3 |
| hsa-miR-1 HNRNPA3 | 1 | 1 | 1 | 3 |
| hsa-miR-4 HNRNPA3 | 1 | 1 | 1 | 3 |
| hsa-miR-2 HNRNPA2 | 1 | 1 | 1 | 3 |
| hsa-miR-2 HMGCS1  | 1 | 1 | 1 | 3 |
| hsa-miR-3 HMGCS1  | 1 | 1 | 1 | 3 |
| hsa-miR-2 HMGCR   | 1 | 1 | 1 | 3 |
| hsa-miR-1 HMGB1   | 1 | 1 | 1 | 3 |
| hsa-miR-4 HMGB1   | 1 | 1 | 1 | 3 |
| hsa-let-7c HMGA2  | 1 | 1 | 1 | 3 |
| hsa-let-7c HMGA1  | 1 | 1 | 1 | 3 |
| hsa-miR-1 HIPK3   | 1 | 1 | 1 | 3 |
| hsa-miR-1 HIGD1A  | 1 | 1 | 1 | 3 |
| hsa-miR-8 HDGF    | 1 | 1 | 1 | 3 |
| hsa-miR-2 HCAR2   | 1 | 1 | 1 | 3 |
| hsa-miR-1 HBS1L   | 1 | 1 | 1 | 3 |
| hsa-miR-3 HBP1    | 1 | 1 | 1 | 3 |
| hsa-miR-5 HBP1    | 1 | 1 | 1 | 3 |
| hsa-miR-1 HAS3    | 1 | 1 | 1 | 3 |
| hsa-miR-2 HAS2    | 1 | 1 | 1 | 3 |
| hsa-miR-2 HAS2    | 1 | 1 | 1 | 3 |
| hsa-let-7c HAND1  | 1 | 1 | 1 | 3 |
| hsa-miR-1 H3F3B   | 1 | 1 | 1 | 3 |
| hsa-miR-6 H3F3B   | 1 | 1 | 1 | 3 |
| hsa-miR-1 H3F3B   | 1 | 1 | 1 | 3 |
| hsa-miR-1 H2AFX   | 1 | 1 | 1 | 3 |
| hsa-miR-1 GXYLT1  | 1 | 1 | 1 | 3 |
| hsa-miR-5 GTF2H1  | 1 | 1 | 1 | 3 |
| hsa-miR-5 GTF2E2  | 1 | 1 | 1 | 3 |
| hsa-let-7c GRPEL2 | 1 | 1 | 1 | 3 |
| hsa-miR-4 GRAMD3  | 1 | 1 | 1 | 3 |
| hsa-miR-3 GPRC5B  | 1 | 1 | 1 | 3 |
| hsa-miR-1 GPR137C | 1 | 1 | 1 | 3 |
| hsa-miR-6 GPM6B   | 1 | 1 | 1 | 3 |
| hsa-miR-1 GPD2    | 1 | 1 | 1 | 3 |
| hsa-miR-4 GPATCH8 | 1 | 1 | 1 | 3 |
| hsa-miR-4 GOLPH3  | 1 | 1 | 1 | 3 |
| hsa-miR-1 GOLM1   | 1 | 1 | 1 | 3 |
| hsa-miR-1 GNPDA2  | 1 | 1 | 1 | 3 |
| hsa-let-7c GNG5   | 1 | 1 | 1 | 3 |
| hsa-miR-2 GNB4    | 1 | 1 | 1 | 3 |
| hsa-miR-1 GNB1    | 1 | 1 | 1 | 3 |
| hsa-miR-1 GNAQ    | 1 | 1 | 1 | 3 |
| hsa-miR-4 GNAL    | 1 | 1 | 1 | 3 |
| hsa-miR-1 GLRX5   | 1 | 1 | 1 | 3 |
| hsa-miR-1 GLCE    | 1 | 1 | 1 | 3 |
| hsa-miR-1 GJA1    | 1 | 1 | 1 | 3 |
| hsa-miR-8 GID4    | 1 | 1 | 1 | 3 |
| hsa-miR-5 GFRA1   | 1 | 1 | 1 | 3 |

|                    |   |   |   |   |
|--------------------|---|---|---|---|
| hsa-miR-1 GCH1     | 1 | 1 | 1 | 3 |
| hsa-miR-4 GALNT1   | 1 | 1 | 1 | 3 |
| hsa-miR-1 GALNT1   | 1 | 1 | 1 | 3 |
| hsa-miR-4 GABPA    | 1 | 1 | 1 | 3 |
| hsa-miR-1 GABBR2   | 1 | 1 | 1 | 3 |
| hsa-miR-4 GABBR2   | 1 | 1 | 1 | 3 |
| hsa-miR-4 GABARAPL | 1 | 1 | 1 | 3 |
| hsa-miR-1 G6PD     | 1 | 1 | 1 | 3 |
| hsa-miR-1 FZD7     | 1 | 1 | 1 | 3 |
| hsa-miR-1 FZD7     | 1 | 1 | 1 | 3 |
| hsa-miR-1 FZD6     | 1 | 1 | 1 | 3 |
| hsa-miR-5 FUT1     | 1 | 1 | 1 | 3 |
| hsa-miR-1 FUBP1    | 1 | 1 | 1 | 3 |
| hsa-miR-1 FSCN1    | 1 | 1 | 1 | 3 |
| hsa-miR-1 FRS2     | 1 | 1 | 1 | 3 |
| hsa-miR-4 FRK      | 1 | 1 | 1 | 3 |
| hsa-miR-1 FRK      | 1 | 1 | 1 | 3 |
| hsa-miR-2 FREM2    | 1 | 1 | 1 | 3 |
| hsa-miR-1 FOXP1    | 1 | 1 | 1 | 3 |
| hsa-miR-1 FOXL2    | 1 | 1 | 1 | 3 |
| hsa-miR-4 FOXK1    | 1 | 1 | 1 | 3 |
| hsa-miR-2 FOXC1    | 1 | 1 | 1 | 3 |
| hsa-miR-1 FOS      | 1 | 1 | 1 | 3 |
| hsa-miR-2 FOS      | 1 | 1 | 1 | 3 |
| hsa-miR-1 FOS      | 1 | 1 | 1 | 3 |
| hsa-miR-1 FNIP2    | 1 | 1 | 1 | 3 |
| hsa-miR-1 FNDC3B   | 1 | 1 | 1 | 3 |
| hsa-miR-1 FNDC3B   | 1 | 1 | 1 | 3 |
| hsa-miR-1 FNDC3A   | 1 | 1 | 1 | 3 |
| hsa-let-7c FNDC3A  | 1 | 1 | 1 | 3 |
| hsa-miR-1 FN1      | 1 | 1 | 1 | 3 |
| hsa-miR-1 FMR1     | 1 | 1 | 1 | 3 |
| hsa-miR-1 FLI1     | 1 | 1 | 1 | 3 |
| hsa-miR-4 FLCN     | 1 | 1 | 1 | 3 |
| hsa-miR-4 FKBP1A   | 1 | 1 | 1 | 3 |
| hsa-let-7c FIGN    | 1 | 1 | 1 | 3 |
| hsa-miR-1 FHIT     | 1 | 1 | 1 | 3 |
| hsa-miR-1 FGFR3    | 1 | 1 | 1 | 3 |
| hsa-miR-9 FGFR3    | 1 | 1 | 1 | 3 |
| hsa-miR-4 FGFR1    | 1 | 1 | 1 | 3 |
| hsa-miR-4 FGF2     | 1 | 1 | 1 | 3 |
| hsa-miR-2 FEM1B    | 1 | 1 | 1 | 3 |
| hsa-miR-1 FBXW7    | 1 | 1 | 1 | 3 |
| hsa-miR-1 FBXO33   | 1 | 1 | 1 | 3 |
| hsa-miR-4 FBXL20   | 1 | 1 | 1 | 3 |
| hsa-miR-1 FBN2     | 1 | 1 | 1 | 3 |
| hsa-miR-2 FBN1     | 1 | 1 | 1 | 3 |
| hsa-miR-4 FASN     | 1 | 1 | 1 | 3 |
| hsa-miR-2 FARP1    | 1 | 1 | 1 | 3 |
| hsa-miR-1 FAR1     | 1 | 1 | 1 | 3 |
| hsa-miR-1 FAM45A   | 1 | 1 | 1 | 3 |
| hsa-miR-1 FAM35A   | 1 | 1 | 1 | 3 |
| hsa-miR-1 FAM160B1 | 1 | 1 | 1 | 3 |
| hsa-miR-4 FAM122B  | 1 | 1 | 1 | 3 |
| hsa-miR-1 FAM120AC | 1 | 1 | 1 | 3 |
| hsa-let-7c FAM104A | 1 | 1 | 1 | 3 |
| hsa-miR-1 FAM103A1 | 1 | 1 | 1 | 3 |
| hsa-miR-1 FAIM     | 1 | 1 | 1 | 3 |

|                    |   |   |   |   |
|--------------------|---|---|---|---|
| hsa-miR-2 EZR      | 1 | 1 | 1 | 3 |
| hsa-miR-1 EZH2     | 1 | 1 | 1 | 3 |
| hsa-miR-1 EXPH5    | 1 | 1 | 1 | 3 |
| hsa-miR-1 ETV6     | 1 | 1 | 1 | 3 |
| hsa-miR-1 ETS1     | 1 | 1 | 1 | 3 |
| hsa-miR-1 ETS1     | 1 | 1 | 1 | 3 |
| hsa-let-7c ESPL1   | 1 | 1 | 1 | 3 |
| hsa-miR-1 ESCO1    | 1 | 1 | 1 | 3 |
| hsa-miR-1 ERG      | 1 | 1 | 1 | 3 |
| hsa-miR-4 EPHB1    | 1 | 1 | 1 | 3 |
| hsa-miR-1 EPHA4    | 1 | 1 | 1 | 3 |
| hsa-miR-1 EPHA4    | 1 | 1 | 1 | 3 |
| hsa-miR-4 ENTPD1   | 1 | 1 | 1 | 3 |
| hsa-miR-2 ENPP2    | 1 | 1 | 1 | 3 |
| hsa-miR-1 ENPEP    | 1 | 1 | 1 | 3 |
| hsa-miR-1 ENO4     | 1 | 1 | 1 | 3 |
| hsa-miR-1 EML3     | 1 | 1 | 1 | 3 |
| hsa-miR-2 ELOVL6   | 1 | 1 | 1 | 3 |
| hsa-miR-2 ELMSAN1  | 1 | 1 | 1 | 3 |
| hsa-miR-4 ELK4     | 1 | 1 | 1 | 3 |
| hsa-miR-1 EIF5A2   | 1 | 1 | 1 | 3 |
| hsa-miR-4 EIF5A    | 1 | 1 | 1 | 3 |
| hsa-let-7c EIF4G2  | 1 | 1 | 1 | 3 |
| hsa-miR-4 EIF4G2   | 1 | 1 | 1 | 3 |
| hsa-miR-1 EIF4EBP1 | 1 | 1 | 1 | 3 |
| hsa-miR-1 EIF4E    | 1 | 1 | 1 | 3 |
| hsa-miR-4 EIF2B2   | 1 | 1 | 1 | 3 |
| hsa-miR-1 EIF1AX   | 1 | 1 | 1 | 3 |
| hsa-miR-1 EIF1AD   | 1 | 1 | 1 | 3 |
| hsa-miR-1 EI24     | 1 | 1 | 1 | 3 |
| hsa-miR-8 EGLN3    | 1 | 1 | 1 | 3 |
| hsa-miR-1 EGFR     | 1 | 1 | 1 | 3 |
| hsa-miR-5 EE2      | 1 | 1 | 1 | 3 |
| hsa-miR-1 EED      | 1 | 1 | 1 | 3 |
| hsa-miR-1 EDN1     | 1 | 1 | 1 | 3 |
| hsa-let-7c EDN1    | 1 | 1 | 1 | 3 |
| hsa-miR-3 EDN1     | 1 | 1 | 1 | 3 |
| hsa-miR-3 EDEM3    | 1 | 1 | 1 | 3 |
| hsa-let-7c EDEM3   | 1 | 1 | 1 | 3 |
| hsa-miR-2 EDEM1    | 1 | 1 | 1 | 3 |
| hsa-miR-1 EDEM1    | 1 | 1 | 1 | 3 |
| hsa-miR-1 EBF1     | 1 | 1 | 1 | 3 |
| hsa-miR-4 E2F7     | 1 | 1 | 1 | 3 |
| hsa-let-7c E2F6    | 1 | 1 | 1 | 3 |
| hsa-miR-1 E2F5     | 1 | 1 | 1 | 3 |
| hsa-let-7c E2F5    | 1 | 1 | 1 | 3 |
| hsa-miR-1 E2F2     | 1 | 1 | 1 | 3 |
| hsa-miR-1 DYRK1A   | 1 | 1 | 1 | 3 |
| hsa-miR-5 DYNLL2   | 1 | 1 | 1 | 3 |
| hsa-miR-1 DVL3     | 1 | 1 | 1 | 3 |
| hsa-miR-1 DUSP6    | 1 | 1 | 1 | 3 |
| hsa-miR-6 DUSP3    | 1 | 1 | 1 | 3 |
| hsa-miR-2 DUSP2    | 1 | 1 | 1 | 3 |
| hsa-miR-1 DUSP10   | 1 | 1 | 1 | 3 |
| hsa-miR-4 DUSP10   | 1 | 1 | 1 | 3 |
| hsa-miR-2 DUSP1    | 1 | 1 | 1 | 3 |
| hsa-miR-1 DUSP1    | 1 | 1 | 1 | 3 |
| hsa-miR-2 DSC2     | 1 | 1 | 1 | 3 |

|                    |   |   |   |   |
|--------------------|---|---|---|---|
| hsa-miR-2 DNMT3B   | 1 | 1 | 1 | 3 |
| hsa-miR-1 DNMT3A   | 1 | 1 | 1 | 3 |
| hsa-miR-2 DNMT3A   | 1 | 1 | 1 | 3 |
| hsa-miR-5 DNAJC15  | 1 | 1 | 1 | 3 |
| hsa-miR-1 DNAJC15  | 1 | 1 | 1 | 3 |
| hsa-let-7c DNA2    | 1 | 1 | 1 | 3 |
| hsa-miR-4 DMTF1    | 1 | 1 | 1 | 3 |
| hsa-miR-1 DIS3     | 1 | 1 | 1 | 3 |
| hsa-miR-3 DIO1     | 1 | 1 | 1 | 3 |
| hsa-miR-2 DICER1   | 1 | 1 | 1 | 3 |
| hsa-miR-1 DHX33    | 1 | 1 | 1 | 3 |
| hsa-miR-1 DHX15    | 1 | 1 | 1 | 3 |
| hsa-miR-1 DGKH     | 1 | 1 | 1 | 3 |
| hsa-miR-1 DEK      | 1 | 1 | 1 | 3 |
| hsa-miR-1 DDX5     | 1 | 1 | 1 | 3 |
| hsa-miR-4 DDX3X    | 1 | 1 | 1 | 3 |
| hsa-miR-1 DDIT4    | 1 | 1 | 1 | 3 |
| hsa-miR-1 DDC      | 1 | 1 | 1 | 3 |
| hsa-miR-5 DDAH1    | 1 | 1 | 1 | 3 |
| hsa-miR-3 DCTN5    | 1 | 1 | 1 | 3 |
| hsa-miR-2 DCTN4    | 1 | 1 | 1 | 3 |
| hsa-miR-1 DAZAP2   | 1 | 1 | 1 | 3 |
| hsa-miR-1 DAB2     | 1 | 1 | 1 | 3 |
| hsa-miR-4 CYP26B1  | 1 | 1 | 1 | 3 |
| hsa-miR-1 CYP24A1  | 1 | 1 | 1 | 3 |
| hsa-miR-4 CUL2     | 1 | 1 | 1 | 3 |
| hsa-miR-1 CTNND1   | 1 | 1 | 1 | 3 |
| hsa-miR-2 CTNNBIP1 | 1 | 1 | 1 | 3 |
| hsa-miR-1 CTNNBIP1 | 1 | 1 | 1 | 3 |
| hsa-miR-1 CTGF     | 1 | 1 | 1 | 3 |
| hsa-miR-9 CTDSPL   | 1 | 1 | 1 | 3 |
| hsa-miR-1 CTDSPL   | 1 | 1 | 1 | 3 |
| hsa-miR-1 CSRNP3   | 1 | 1 | 1 | 3 |
| hsa-miR-2 CSRNP2   | 1 | 1 | 1 | 3 |
| hsa-miR-1 CSNK2A1  | 1 | 1 | 1 | 3 |
| hsa-let-7c CRY2    | 1 | 1 | 1 | 3 |
| hsa-miR-1 CRLF3    | 1 | 1 | 1 | 3 |
| hsa-miR-4 CRKL     | 1 | 1 | 1 | 3 |
| hsa-miR-4 CRIM1    | 1 | 1 | 1 | 3 |
| hsa-miR-4 CREBRF   | 1 | 1 | 1 | 3 |
| hsa-miR-3 CREBRF   | 1 | 1 | 1 | 3 |
| hsa-miR-2 CREB5    | 1 | 1 | 1 | 3 |
| hsa-miR-4 CPSF7    | 1 | 1 | 1 | 3 |
| hsa-miR-4 CPEB3    | 1 | 1 | 1 | 3 |
| hsa-let-7c CPA4    | 1 | 1 | 1 | 3 |
| hsa-miR-1 CORO1C   | 1 | 1 | 1 | 3 |
| hsa-miR-1 COMMD3   | 1 | 1 | 1 | 3 |
| hsa-miR-2 COMMD2   | 1 | 1 | 1 | 3 |
| hsa-miR-1 COMMD2   | 1 | 1 | 1 | 3 |
| hsa-miR-2 COL7A1   | 1 | 1 | 1 | 3 |
| hsa-miR-2 COL6A2   | 1 | 1 | 1 | 3 |
| hsa-miR-2 COL5A3   | 1 | 1 | 1 | 3 |
| hsa-miR-2 COL5A2   | 1 | 1 | 1 | 3 |
| hsa-miR-1 COL5A2   | 1 | 1 | 1 | 3 |
| hsa-miR-2 COL4A2   | 1 | 1 | 1 | 3 |
| hsa-miR-2 COL4A1   | 1 | 1 | 1 | 3 |
| hsa-miR-2 COL3A1   | 1 | 1 | 1 | 3 |
| hsa-miR-2 COL21A1  | 1 | 1 | 1 | 3 |

|                    |   |   |   |   |
|--------------------|---|---|---|---|
| hsa-miR-1 COL1A1   | 1 | 1 | 1 | 3 |
| hsa-miR-2 COL15A1  | 1 | 1 | 1 | 3 |
| hsa-let-7c COIL    | 1 | 1 | 1 | 3 |
| hsa-miR-1 COIL     | 1 | 1 | 1 | 3 |
| hsa-miR-2 COIL     | 1 | 1 | 1 | 3 |
| hsa-miR-1 CNTLN    | 1 | 1 | 1 | 3 |
| hsa-miR-1 CNN3     | 1 | 1 | 1 | 3 |
| hsa-miR-1 CNN2     | 1 | 1 | 1 | 3 |
| hsa-miR-4 CNEP1R1  | 1 | 1 | 1 | 3 |
| hsa-miR-1 CLTC     | 1 | 1 | 1 | 3 |
| hsa-miR-4 CLSPN    | 1 | 1 | 1 | 3 |
| hsa-miR-1 CLOCK    | 1 | 1 | 1 | 3 |
| hsa-miR-5 CLOCK    | 1 | 1 | 1 | 3 |
| hsa-miR-1 CLINT1   | 1 | 1 | 1 | 3 |
| hsa-let-7c CLDN12  | 1 | 1 | 1 | 3 |
| hsa-miR-1 CLCN3    | 1 | 1 | 1 | 3 |
| hsa-miR-1 CIAPIN1  | 1 | 1 | 1 | 3 |
| hsa-miR-1 CHSY1    | 1 | 1 | 1 | 3 |
| hsa-miR-1 CHST10   | 1 | 1 | 1 | 3 |
| hsa-miR-2 CHRDL1   | 1 | 1 | 1 | 3 |
| hsa-miR-2 CHORDC1  | 1 | 1 | 1 | 3 |
| hsa-miR-2 CHIC2    | 1 | 1 | 1 | 3 |
| hsa-miR-4 CHIC1    | 1 | 1 | 1 | 3 |
| hsa-miR-4 CHEK1    | 1 | 1 | 1 | 3 |
| hsa-miR-1 CGN      | 1 | 1 | 1 | 3 |
| hsa-miR-1 CERS2    | 1 | 1 | 1 | 3 |
| hsa-miR-1 CERS2    | 1 | 1 | 1 | 3 |
| hsa-miR-4 CEP55    | 1 | 1 | 1 | 3 |
| hsa-miR-3 CEP170   | 1 | 1 | 1 | 3 |
| hsa-let-7c CEP135  | 1 | 1 | 1 | 3 |
| hsa-miR-4 CENPK    | 1 | 1 | 1 | 3 |
| hsa-miR-1 CEBPZ    | 1 | 1 | 1 | 3 |
| hsa-miR-1 CDKN1A   | 1 | 1 | 1 | 3 |
| hsa-let-7c CDKN1A  | 1 | 1 | 1 | 3 |
| hsa-miR-1 CDK6     | 1 | 1 | 1 | 3 |
| hsa-miR-2 CDK6     | 1 | 1 | 1 | 3 |
| hsa-miR-1 CDK6     | 1 | 1 | 1 | 3 |
| hsa-miR-4 CDK17    | 1 | 1 | 1 | 3 |
| hsa-miR-1 CDK14    | 1 | 1 | 1 | 3 |
| hsa-miR-1 CDK13    | 1 | 1 | 1 | 3 |
| hsa-miR-1 CDH5     | 1 | 1 | 1 | 3 |
| hsa-miR-1 CDH5     | 1 | 1 | 1 | 3 |
| hsa-miR-4 CDH2     | 1 | 1 | 1 | 3 |
| hsa-miR-2 CDH2     | 1 | 1 | 1 | 3 |
| hsa-miR-2 CDCA7    | 1 | 1 | 1 | 3 |
| hsa-miR-4 CDCA4    | 1 | 1 | 1 | 3 |
| hsa-miR-5 CDC5L    | 1 | 1 | 1 | 3 |
| hsa-miR-4 CDC42SE2 | 1 | 1 | 1 | 3 |
| hsa-miR-2 CDC42SE1 | 1 | 1 | 1 | 3 |
| hsa-miR-1 CDC42SE1 | 1 | 1 | 1 | 3 |
| hsa-miR-2 CDC42    | 1 | 1 | 1 | 3 |
| hsa-miR-4 CDC37L1  | 1 | 1 | 1 | 3 |
| hsa-miR-4 CDC25A   | 1 | 1 | 1 | 3 |
| hsa-miR-3 CD59     | 1 | 1 | 1 | 3 |
| hsa-miR-1 CD2AP    | 1 | 1 | 1 | 3 |
| hsa-miR-4 CD2AP    | 1 | 1 | 1 | 3 |
| hsa-miR-2 CD276    | 1 | 1 | 1 | 3 |
| hsa-miR-1 CCP110   | 1 | 1 | 1 | 3 |

|                     |   |   |   |   |
|---------------------|---|---|---|---|
| hsa-miR-2 CCNT2     | 1 | 1 | 1 | 3 |
| hsa-miR-5 CCNT2     | 1 | 1 | 1 | 3 |
| hsa-miR-2 CCNT2     | 1 | 1 | 1 | 3 |
| hsa-miR-1 CCNJ      | 1 | 1 | 1 | 3 |
| hsa-let-7c CCNF     | 1 | 1 | 1 | 3 |
| hsa-miR-4 CCNE1     | 1 | 1 | 1 | 3 |
| hsa-miR-2 CCND2     | 1 | 1 | 1 | 3 |
| hsa-miR-2 CCND1     | 1 | 1 | 1 | 3 |
| hsa-miR-4 CCND1     | 1 | 1 | 1 | 3 |
| hsa-miR-2 CCNA2     | 1 | 1 | 1 | 3 |
| hsa-miR-5 CCL22     | 1 | 1 | 1 | 3 |
| hsa-miR-1 CCL2      | 1 | 1 | 1 | 3 |
| hsa-miR-4 CCDC88C   | 1 | 1 | 1 | 3 |
| hsa-miR-1 CCDC170   | 1 | 1 | 1 | 3 |
| hsa-miR-2 CCDC117   | 1 | 1 | 1 | 3 |
| hsa-miR-1 CCDC117   | 1 | 1 | 1 | 3 |
| hsa-miR-1 CBX6      | 1 | 1 | 1 | 3 |
| hsa-let-7c CBX5     | 1 | 1 | 1 | 3 |
| hsa-miR-4 CBX4      | 1 | 1 | 1 | 3 |
| hsa-miR-1 CBX4      | 1 | 1 | 1 | 3 |
| hsa-miR-5 CBX4      | 1 | 1 | 1 | 3 |
| hsa-miR-4 CBX2      | 1 | 1 | 1 | 3 |
| hsa-let-7c CBL      | 1 | 1 | 1 | 3 |
| hsa-miR-1 CBF3      | 1 | 1 | 1 | 3 |
| hsa-miR-1 CBFA2T2   | 1 | 1 | 1 | 3 |
| hsa-miR-8 CASP2     | 1 | 1 | 1 | 3 |
| hsa-miR-2 CASP1     | 1 | 1 | 1 | 3 |
| hsa-miR-4 CASK      | 1 | 1 | 1 | 3 |
| hsa-miR-3 CARD8     | 1 | 1 | 1 | 3 |
| hsa-miR-4 CARD10    | 1 | 1 | 1 | 3 |
| hsa-miR-4 CAPZA2    | 1 | 1 | 1 | 3 |
| hsa-miR-2 CAPRN1    | 1 | 1 | 1 | 3 |
| hsa-miR-1 CAPN2     | 1 | 1 | 1 | 3 |
| hsa-miR-6 CAP2      | 1 | 1 | 1 | 3 |
| hsa-miR-2 CAND1     | 1 | 1 | 1 | 3 |
| hsa-miR-4 CAMSAP1   | 1 | 1 | 1 | 3 |
| hsa-miR-2 CALU      | 1 | 1 | 1 | 3 |
| hsa-miR-4 CALU      | 1 | 1 | 1 | 3 |
| hsa-miR-1 CALM1     | 1 | 1 | 1 | 3 |
| hsa-miR-4 CALM1     | 1 | 1 | 1 | 3 |
| hsa-miR-1 CADM1     | 1 | 1 | 1 | 3 |
| hsa-miR-1 CADM1     | 1 | 1 | 1 | 3 |
| hsa-miR-4 CACUL1    | 1 | 1 | 1 | 3 |
| hsa-miR-1 CABLES1   | 1 | 1 | 1 | 3 |
| hsa-let-7c C9orf40  | 1 | 1 | 1 | 3 |
| hsa-miR-1 C1S       | 1 | 1 | 1 | 3 |
| hsa-miR-1 C1orf52   | 1 | 1 | 1 | 3 |
| hsa-let-7c C19orf47 | 1 | 1 | 1 | 3 |
| hsa-miR-1 C12orf49  | 1 | 1 | 1 | 3 |
| hsa-miR-4 C11orf24  | 1 | 1 | 1 | 3 |
| hsa-miR-3 C10orf111 | 1 | 1 | 1 | 3 |
| hsa-miR-4 BZW1      | 1 | 1 | 1 | 3 |
| hsa-let-7c BZW1     | 1 | 1 | 1 | 3 |
| hsa-miR-3 BTG2      | 1 | 1 | 1 | 3 |
| hsa-miR-1 BTG2      | 1 | 1 | 1 | 3 |
| hsa-miR-5 BTG1      | 1 | 1 | 1 | 3 |
| hsa-miR-1 BSCL2     | 1 | 1 | 1 | 3 |
| hsa-miR-5 BRWD3     | 1 | 1 | 1 | 3 |

|                    |   |   |   |   |
|--------------------|---|---|---|---|
| hsa-miR-5 BRD4     | 1 | 1 | 1 | 3 |
| hsa-miR-1 BNIP3    | 1 | 1 | 1 | 3 |
| hsa-miR-5 BNC2     | 1 | 1 | 1 | 3 |
| hsa-miR-5 BNC2     | 1 | 1 | 1 | 3 |
| hsa-miR-1 BMPR2    | 1 | 1 | 1 | 3 |
| hsa-miR-1 BMPR1B   | 1 | 1 | 1 | 3 |
| hsa-miR-1 BMF      | 1 | 1 | 1 | 3 |
| hsa-miR-1 BLMH     | 1 | 1 | 1 | 3 |
| hsa-miR-5 BIRC5    | 1 | 1 | 1 | 3 |
| hsa-miR-2 BIRC2    | 1 | 1 | 1 | 3 |
| hsa-miR-1 BICD2    | 1 | 1 | 1 | 3 |
| hsa-miR-2 BEND4    | 1 | 1 | 1 | 3 |
| hsa-miR-1 BDNF     | 1 | 1 | 1 | 3 |
| hsa-miR-6 BCL9     | 1 | 1 | 1 | 3 |
| hsa-miR-1 BCL9     | 1 | 1 | 1 | 3 |
| hsa-miR-5 BCL7A    | 1 | 1 | 1 | 3 |
| hsa-miR-1 BCL2L11  | 1 | 1 | 1 | 3 |
| hsa-miR-2 BCL2     | 1 | 1 | 1 | 3 |
| hsa-miR-3 BCL11B   | 1 | 1 | 1 | 3 |
| hsa-miR-1 BCKDHB   | 1 | 1 | 1 | 3 |
| hsa-miR-4 BAG4     | 1 | 1 | 1 | 3 |
| hsa-miR-2 BACH2    | 1 | 1 | 1 | 3 |
| hsa-miR-5 BACH2    | 1 | 1 | 1 | 3 |
| hsa-miR-3 BACH1    | 1 | 1 | 1 | 3 |
| hsa-let-7c BACH1   | 1 | 1 | 1 | 3 |
| hsa-miR-1 B2M      | 1 | 1 | 1 | 3 |
| hsa-miR-4 AXIN2    | 1 | 1 | 1 | 3 |
| hsa-miR-4 AVL9     | 1 | 1 | 1 | 3 |
| hsa-miR-4 ATXN7L3B | 1 | 1 | 1 | 3 |
| hsa-miR-1 ATXN1L   | 1 | 1 | 1 | 3 |
| hsa-miR-5 ATXN1    | 1 | 1 | 1 | 3 |
| hsa-miR-1 ATXN1    | 1 | 1 | 1 | 3 |
| hsa-miR-1 ATXN1    | 1 | 1 | 1 | 3 |
| hsa-miR-1 ATP6V1A  | 1 | 1 | 1 | 3 |
| hsa-miR-4 ATP5G3   | 1 | 1 | 1 | 3 |
| hsa-miR-4 ATG9A    | 1 | 1 | 1 | 3 |
| hsa-miR-4 ATG14    | 1 | 1 | 1 | 3 |
| hsa-miR-4 ATF6     | 1 | 1 | 1 | 3 |
| hsa-miR-1 ASH2L    | 1 | 1 | 1 | 3 |
| hsa-miR-4 ASH1L    | 1 | 1 | 1 | 3 |
| hsa-miR-1 ARSK     | 1 | 1 | 1 | 3 |
| hsa-miR-1 ARL6IP5  | 1 | 1 | 1 | 3 |
| hsa-miR-1 ARL5B    | 1 | 1 | 1 | 3 |
| hsa-miR-2 ARL5A    | 1 | 1 | 1 | 3 |
| hsa-miR-4 ARIH1    | 1 | 1 | 1 | 3 |
| hsa-miR-1 ARID3B   | 1 | 1 | 1 | 3 |
| hsa-miR-1 ARID2    | 1 | 1 | 1 | 3 |
| hsa-miR-1 ARID1A   | 1 | 1 | 1 | 3 |
| hsa-miR-1 ARHGEF18 | 1 | 1 | 1 | 3 |
| hsa-miR-4 ARHGDI   | 1 | 1 | 1 | 3 |
| hsa-miR-4 ARHGAP3  | 1 | 1 | 1 | 3 |
| hsa-miR-2 ARHGAP2  | 1 | 1 | 1 | 3 |
| hsa-miR-4 ARHGAP1  | 1 | 1 | 1 | 3 |
| hsa-miR-1 ARF6     | 1 | 1 | 1 | 3 |
| hsa-miR-1 ARF3     | 1 | 1 | 1 | 3 |
| hsa-miR-1 ARCN1    | 1 | 1 | 1 | 3 |
| hsa-miR-1 ARAP2    | 1 | 1 | 1 | 3 |
| hsa-miR-2 ARAP2    | 1 | 1 | 1 | 3 |



|                    |   |   |   |   |
|--------------------|---|---|---|---|
| hsa-miR-1 APC      | 1 | 1 | 1 | 3 |
| hsa-miR-1 AP3D1    | 1 | 1 | 1 | 3 |
| hsa-miR-1 AP1S3    | 1 | 1 | 1 | 3 |
| hsa-miR-2 AP1S2    | 1 | 1 | 1 | 3 |
| hsa-miR-1 AP1S1    | 1 | 1 | 1 | 3 |
| hsa-miR-2 AP1S1    | 1 | 1 | 1 | 3 |
| hsa-let-7c AP1S1   | 1 | 1 | 1 | 3 |
| hsa-miR-1 AP1G1    | 1 | 1 | 1 | 3 |
| hsa-miR-8 AOC3     | 1 | 1 | 1 | 3 |
| hsa-miR-3 AOC3     | 1 | 1 | 1 | 3 |
| hsa-miR-1 ANXA2    | 1 | 1 | 1 | 3 |
| hsa-miR-5 ANKS1A   | 1 | 1 | 1 | 3 |
| hsa-miR-4 ANKRD50  | 1 | 1 | 1 | 3 |
| hsa-let-7c ANKRD46 | 1 | 1 | 1 | 3 |
| hsa-miR-1 ANKRD33E | 1 | 1 | 1 | 3 |
| hsa-miR-6 ANKRD33E | 1 | 1 | 1 | 3 |
| hsa-miR-1 ANKRD29  | 1 | 1 | 1 | 3 |
| hsa-miR-1 ANKRD28  | 1 | 1 | 1 | 3 |
| hsa-miR-1 ANKRD17  | 1 | 1 | 1 | 3 |
| hsa-miR-2 ANKRD13C | 1 | 1 | 1 | 3 |
| hsa-miR-2 ANKRD13A | 1 | 1 | 1 | 3 |
| hsa-miR-1 ANKRD11  | 1 | 1 | 1 | 3 |
| hsa-miR-1 ANKRD11  | 1 | 1 | 1 | 3 |
| hsa-miR-1 ANKIB1   | 1 | 1 | 1 | 3 |
| hsa-miR-2 ANKIFY1  | 1 | 1 | 1 | 3 |
| hsa-miR-2 ANGPTL2  | 1 | 1 | 1 | 3 |
| hsa-miR-1 ANGPT2   | 1 | 1 | 1 | 3 |
| hsa-miR-5 ANGPT2   | 1 | 1 | 1 | 3 |
| hsa-miR-1 ANAPC16  | 1 | 1 | 1 | 3 |
| hsa-miR-1 AMOTL1   | 1 | 1 | 1 | 3 |
| hsa-miR-4 AMOTL1   | 1 | 1 | 1 | 3 |
| hsa-miR-2 AMER1    | 1 | 1 | 1 | 3 |
| hsa-miR-2 ALPL     | 1 | 1 | 1 | 3 |
| hsa-miR-4 AKT3     | 1 | 1 | 1 | 3 |
| hsa-miR-2 AKT3     | 1 | 1 | 1 | 3 |
| hsa-miR-1 AKAP12   | 1 | 1 | 1 | 3 |
| hsa-miR-1 AKAP10   | 1 | 1 | 1 | 3 |
| hsa-miR-4 AKAP10   | 1 | 1 | 1 | 3 |
| hsa-miR-2 AKAP1    | 1 | 1 | 1 | 3 |
| hsa-miR-5 AKAP1    | 1 | 1 | 1 | 3 |
| hsa-miR-1 AIMP1    | 1 | 1 | 1 | 3 |
| hsa-miR-4 AGO4     | 1 | 1 | 1 | 3 |
| hsa-miR-9 AGO2     | 1 | 1 | 1 | 3 |
| hsa-miR-1 AEBP2    | 1 | 1 | 1 | 3 |
| hsa-miR-3 ADSS     | 1 | 1 | 1 | 3 |
| hsa-miR-1 ADPGK    | 1 | 1 | 1 | 3 |
| hsa-miR-2 ADIPOR2  | 1 | 1 | 1 | 3 |
| hsa-miR-1 ADD3     | 1 | 1 | 1 | 3 |
| hsa-miR-1 ADD3     | 1 | 1 | 1 | 3 |
| hsa-miR-1 ADAR     | 1 | 1 | 1 | 3 |
| hsa-miR-1 ADAM17   | 1 | 1 | 1 | 3 |
| hsa-miR-1 ADAM12   | 1 | 1 | 1 | 3 |
| hsa-miR-4 ACVR2A   | 1 | 1 | 1 | 3 |
| hsa-miR-4 ACTR2    | 1 | 1 | 1 | 3 |
| hsa-miR-1 ACTB     | 1 | 1 | 1 | 3 |
| hsa-miR-4 ACSL4    | 1 | 1 | 1 | 3 |
| hsa-miR-1 ACSL4    | 1 | 1 | 1 | 3 |
| hsa-miR-3 ACPP     | 1 | 1 | 1 | 3 |

|                    |   |   |   |   |
|--------------------|---|---|---|---|
| hsa-miR-1 ACER2    | 1 | 1 | 1 | 3 |
| hsa-let-7c ACER2   | 1 | 1 | 1 | 3 |
| hsa-miR-5 ACBD3    | 1 | 1 | 1 | 3 |
| hsa-miR-1 ABTB1    | 1 | 1 | 1 | 3 |
| hsa-miR-1 ABRACL   | 1 | 1 | 1 | 3 |
| hsa-miR-1 ABRACL   | 1 | 1 | 1 | 3 |
| hsa-miR-4 ABL2     | 1 | 1 | 1 | 3 |
| hsa-miR-4 ABHD2    | 1 | 1 | 1 | 3 |
| hsa-miR-1 ABHD17C  | 1 | 1 | 1 | 3 |
| hsa-miR-1 ABHD17C  | 1 | 1 | 1 | 3 |
| hsa-miR-2 ABCE1    | 1 | 1 | 1 | 3 |
| hsa-miR-1 ABCC5    | 1 | 1 | 1 | 3 |
| hsa-miR-1 ABCB7    | 1 | 1 | 1 | 3 |
| hsa-miR-1 AASDHPP1 | 1 | 1 | 1 | 3 |

**Supplemental Table 3** The top eight significant prognostic genes revealed by univariate Cox proportional hazards regression

| Gene   | Hazard ratio | 95% Confidence interval | pvalue |
|--------|--------------|-------------------------|--------|
| ESPL1  | 1.430        | (1.155, 1.770)          | 0.001  |
| NR3C1  | 1.332        | (1.117, 1.589)          | 0.001  |
| CCNE1  | 1.243        | (1.083, 1.426)          | 0.002  |
| GATA4  | 1.109        | (1.036, 1.188)          | 0.003  |
| KIF23  | 1.409        | (1.113, 1.784)          | 0.004  |
| EZH2   | 1.479        | (1.118, 1.957)          | 0.006  |
| CDC25A | 1.304        | (1.039, 1.636)          | 0.022  |
| BIRC5  | 1.238        | (1.027, 1.493)          | 0.025  |
